# Supplementary material for: Highly facile and regio-selective synthesis of pyrazolo[1,5-a]pyrimidines via reactions of 1,2-allenic ketones with aminopyrazoles
Source: Royal Society of Chemistry journal article supplement (doi:10.1039/c3ob42445f), 2014-01-01
Supplement: c3ob42445f1.pdf [file c3ob42445f1.pdf]

## Supporting Information

### **Highly Facile and Regio-Selective Synthesis of Pyrazolo[1,5-*a*]pyrimidines via Reactions of 1,2-Allenic Ketones with Aminopyrazoles**

Xinying Zhang,\* Yunping Song, Lin Gao, Xiaojie Guo and Xuesen Fan\*

*School of Chemistry and Chemical Engineering, Key Laboratory of Green Chemical Media and  
Reactions, Ministry of Education, Collaborative Innovation Center of Henan Province for Green  
Manufacturing of Fine Chemicals, Henan Normal University, Xinxiang, Henan 453007, P. R. China.*

*E-mail: xinyingzhang@htu.cn; xuesen.fan@htu.cn*

#### **I. General Experimental Information**

#### **II. Experimental Procedures and Spectroscopic Data**

#### **III. Copies of <sup>1</sup>H and <sup>13</sup>C NMR spectra of 3a-3l, 4ii-4ll, 7, 8, 11, 12**

#### **IV. X-ray crystal structures and crystal data of 3jj and 4jj**

## I. General Experimental Information

All the commercial reagents and solvents were used without further purification.  $^1\text{H}$  and  $^{13}\text{C}$  NMR spectra were recorded at 400 and 100 MHz, respectively. Splitting patterns are designated as s (singlet), d (doublet), t (triplet), q (quartet), m (multiplet), and br. (broad). High-resolution mass spectra (HRMS) were obtained by using a MicroTOF mass spectrometer. All reactions were monitored by thin-layer chromatography (TLC) using silica gel plates (silica gel 60 F254 0.25 mm) and components were visualized by observation under UV light.

## II. Experimental Procedures and Spectroscopic Data

### 2.1 General procedure for the preparation of pyrazolo[1,5-*a*]pyrimidines **3**, **4**, **7** and **11**

A mixture of 1,2-allenic ketone (1 mmol) and aminopyrazole **2** (1 mmol) in acetone (4 mL) was stirred at rt. Upon completion as indicated by TLC, the resulting mixture was concentrated under vacuum. The residue was purified by chromatography on silica gel to afford the title product.

**5-methyl-7-phenylpyrazolo[1,5-*a*]pyrimidine (3a)**: yellow solid.  $^1\text{H}$  NMR (400MHz,  $\text{CDCl}_3$ )  $\delta$ : 2.60 (s, 3H), 6.61 (d,  $J = 2.0$  Hz, 1H), 6.71 (s, 1H), 7.51 (t,  $J = 3.2$  Hz, 3H), 7.94-7.97 (m, 2H), 8.07 (d,  $J = 2.0$  Hz, 1H);  $^{13}\text{C}$  NMR (100MHz,  $\text{CDCl}_3$ )  $\delta$ : 24.8, 95.9, 108.3, 128.7, 129.2, 130.9, 131.2, 144.7, 146.1, 149.5, 158.7. HRMS calcd for  $\text{C}_{13}\text{H}_{12}\text{N}_3$ : 210.1031 [M+H], found: 210.1037.

**5-methyl-7-(4-(trifluoromethyl)phenyl)pyrazolo[1,5-*a*]pyrimidine (3b)**: yellow solid.  $^1\text{H}$  NMR (400MHz,  $\text{CDCl}_3$ )  $\delta$ : 2.58 (s, 3H), 6.59 (d,  $J = 2.4$  Hz, 1H), 6.70 (s, 1H), 7.73 (d,  $J = 8.4$  Hz, 2H), 8.02-8.06 (m, 3H);  $^{13}\text{C}$  NMR (100MHz,  $\text{CDCl}_3$ )  $\delta$ : 24.7, 96.2, 108.6, 119.6, 122.3, 125.0, 125.5, 125.5, 125.6, 125.6, 127.8, 129.6, 132.0, 132.3, 132.6, 132.9, 134.6, 144.4, 144.7, 149.4, 158.8. HRMS calcd for  $\text{C}_{14}\text{H}_{11}\text{F}_3\text{N}_3$ : 278.0905 [M+H], found: 278.0911.

**7-(4-bromophenyl)-5-methylpyrazolo[1,5-*a*]pyrimidine (3c)**: yellow solid.  $^1\text{H}$  NMR (400MHz,  $\text{CDCl}_3$ )  $\delta$ : 2.57 (s, 3H), 6.58 (d,  $J = 2.0$  Hz, 1H), 6.66 (s, 1H), 7.59 (dd,  $J_1 = 6.4$  Hz,  $J_2 = 2.0$  Hz, 2H), 7.82 (dd,  $J_1 = 6.4$  Hz,  $J_2 = 2.0$  Hz, 2H), 8.02 (d,  $J = 2.4$  Hz, 1H);  $^{13}\text{C}$  NMR (100MHz,  $\text{CDCl}_3$ )  $\delta$ : 24.8, 96.0, 108.1, 125.4, 129.9, 130.7, 131.9, 144.6, 144.8, 149.5, 158.6. HRMS calcd for  $\text{C}_{13}\text{H}_{11}\text{BrN}_3$ : 288.0136 [M+H], found: 288.0145.

**7-(4-methoxyphenyl)-5-methylpyrazolo[1,5-*a*]pyrimidine (3d)**: yellow solid.  $^1\text{H}$  NMR (400MHz,  $\text{CDCl}_3$ )  $\delta$ : 2.53 (s, 3H), 3.78 (s, 3H), 6.54 (d,  $J = 2.0$  Hz, 1H), 6.63 (s, 1H), 6.95 (d,  $J = 8.8$  Hz, 2H), 7.93 (d,  $J = 8.8$  Hz, 2H), 8.02 (d,  $J = 2.4$  Hz, 1H);  $^{13}\text{C}$  NMR (100MHz,  $\text{CDCl}_3$ )  $\delta$ : 24.7, 55.4, 95.6, 107.4,

114.0, 123.2, 130.9, 144.4, 145.8, 149.6, 158.6, 161.6. HRMS calcd for C<sub>14</sub>H<sub>14</sub>N<sub>3</sub>O: 240.1137 [M+H], found: 240.1131.

**5-methyl-7-*p*-tolylpyrazolo[1,5-*a*]pyrimidine (3e):** yellow solid. <sup>1</sup>H NMR (400MHz, CDCl<sub>3</sub>) δ: 2.42 (s, 3H), 2.60 (s, 3H), 6.61 (d, *J* = 2.0 Hz, 1H), 6.71 (s, 1H), 7.32 (d, *J* = 8.0 Hz, 2H), 7.88 (d, *J* = 8.0 Hz, 2H), 8.07 (d, *J* = 2.0 Hz, 1H); <sup>13</sup>C NMR (100MHz, CDCl<sub>3</sub>) δ: 21.6, 24.7, 95.7, 108.0, 128.2, 129.1, 129.3, 141.3, 144.6, 146.3, 149.5, 158.7. HRMS calcd for C<sub>14</sub>H<sub>14</sub>N<sub>3</sub>: 224.1188 [M+H], found: 224.1181.

**7-(3-chlorophenyl)-5-methylpyrazolo[1,5-*a*]pyrimidine (3f):** yellow solid. <sup>1</sup>H NMR (400MHz, CDCl<sub>3</sub>) δ: 2.56 (s, 3H), 6.58 (d, *J* = 2.4 Hz, 1H), 6.67 (s, 1H), 7.38-7.44 (m, 2H), 7.82 (d, *J* = 7.6 Hz, 1H), 7.93 (s, 1H), 8.03 (d, *J* = 2.0 Hz, 1H); <sup>13</sup>C NMR (100MHz, CDCl<sub>3</sub>) δ: 24.8, 96.1, 108.4, 127.3, 129.2, 129.9, 130.9, 132.7, 134.6, 144.4, 144.7, 149.5, 158.7. HRMS calcd for C<sub>13</sub>H<sub>11</sub>ClN<sub>3</sub>: 244.0642 [M+H], found: 244.0651.

**7-(2-fluorophenyl)-5-methylpyrazolo[1,5-*a*]pyrimidine (3g):** yellow solid. <sup>1</sup>H NMR (400MHz, CDCl<sub>3</sub>) δ: 2.63 (s, 3H), 6.64 (d, *J* = 2.4 Hz, 1H), 6.76 (s, 1H), 7.26 (t, *J* = 9.2 Hz, 1H), 7.31 (t, *J* = 7.2 Hz, 1H), 7.50-7.54 (m, 1H), 7.75 (td, *J*<sub>1</sub> = 7.6 Hz, *J*<sub>2</sub> = 1.6 Hz, 1H), 8.07 (d, *J* = 2.4 Hz, 1H); <sup>13</sup>C NMR (100MHz, CDCl<sub>3</sub>) δ: 24.8, 96.1, 110.2, 110.2, 116.3, 116.6, 119.2, 124.4, 124.4, 131.1, 131.1, 132.6, 132.6, 141.3, 144.7, 149.1, 158.4, 158.7, 161.2. HRMS calcd for C<sub>13</sub>H<sub>11</sub>FN<sub>3</sub>: 228.0937 [M+H], found: 228.0945.

**5-methyl-7-(naphthalen-1-yl)pyrazolo[1,5-*a*]pyrimidine (3h):** yellow solid. <sup>1</sup>H NMR (400MHz, CDCl<sub>3</sub>) δ: 2.63 (s, 3H), 6.69 (d, *J* = 2.0 Hz, 1H), 6.72 (s, 1H), 7.36-7.38 (m, 2H), 7.45-7.49 (m, 1H), 7.55 (t, *J* = 7.2 Hz, 1H), 7.63 (d, *J* = 6.4 Hz, 1H), 7.89 (d, *J* = 8.4 Hz, 1H), 7.98 (s, 1H), 8.01 (d, *J* = 2.0 Hz, 1H); <sup>13</sup>C NMR (100MHz, CDCl<sub>3</sub>) δ: 24.8, 95.9, 110.6, 125.1, 125.2, 126.5, 127.0, 127.9, 128.7, 129.3, 130.7, 131.0, 133.6, 144.9, 146.0, 149.3, 158.6. HRMS calcd for C<sub>17</sub>H<sub>14</sub>N<sub>3</sub>: 260.1188 [M+H], found: 260.1182.

**5-methyl-7-(thiophen-2-yl)pyrazolo[1,5-*a*]pyrimidine (3i):** yellow solid.  $^1\text{H}$  NMR (400MHz,  $\text{CDCl}_3$ )  $\delta$ : 2.61 (s, 3H), 6.61 (d,  $J = 2.0$  Hz, 1H), 7.05 (s, 1H), 7.21 (t,  $J = 4.4$  Hz, 1H), 7.66 (d,  $J = 4.8$  Hz, 1H), 8.17 (d,  $J = 1.6$  Hz, 1H), 8.26 (d,  $J = 2.4$  Hz, 1H);  $^{13}\text{C}$  NMR (100MHz,  $\text{CDCl}_3$ )  $\delta$ : 24.7, 95.8, 104.7, 127.6, 131.2, 131.5, 131.9, 139.4, 144.3, 149.5, 158.0. HRMS calcd for  $\text{C}_{11}\text{H}_{10}\text{N}_3\text{S}$ : 216.0595 [M+H], found: 216.0587.

**7-benzyl-5-methylpyrazolo[1,5-*a*]pyrimidine (3j):** yellow solid.  $^1\text{H}$  NMR (400MHz,  $\text{CDCl}_3$ )  $\delta$ : 2.45 (s, 3H), 4.42 (s, 2H), 6.19 (s, 1H), 6.56 (d,  $J = 2.4$  Hz, 1H), 7.27-7.33 (m, 5H), 8.06 (d,  $J = 2.0$  Hz, 1H);  $^{13}\text{C}$  NMR (100MHz,  $\text{CDCl}_3$ )  $\delta$ : 24.7, 36.2, 95.9, 107.7, 127.4, 128.9, 129.7, 134.8, 144.3, 148.1, 148.6, 158.5. HRMS calcd for  $\text{C}_{14}\text{H}_{14}\text{N}_3$ : 224.1188 [M+H], found: 224.1192.

**5-methyl-7-phenethylpyrazolo[1,5-*a*]pyrimidine (3k):** yellow solid.  $^1\text{H}$  NMR (400MHz,  $\text{CDCl}_3$ )  $\delta$ : 2.46 (s, 3H), 3.10 (t,  $J = 7.6$  Hz, 2H), 3.35 (t,  $J = 7.6$  Hz, 2H), 6.36 (s, 1H), 6.53 (d,  $J = 2.4$  Hz, 1H), 7.13-7.23 (m, 5H), 8.04 (d,  $J = 2.0$  Hz, 1H);  $^{13}\text{C}$  NMR (100MHz,  $\text{CDCl}_3$ )  $\delta$ : 24.7, 31.9, 32.2, 95.7, 107.4, 126.4, 128.4, 128.6, 140.1, 144.2, 147.8, 148.6, 158.3. HRMS calcd for  $\text{C}_{15}\text{H}_{16}\text{N}_3$ : 238.1344 [M+H], found: 238.1341.

**5-ethyl-7-phenylpyrazolo[1,5-*a*]pyrimidine (3l):** yellow solid.  $^1\text{H}$  NMR (400MHz,  $\text{CDCl}_3$ )  $\delta$ : 1.41 (t,  $J = 8.0$  Hz, 3H), 2.93 (q,  $J = 7.6$  Hz, 2H), 6.68 (s, 1H), 6.79 (s, 1H), 7.56 (s, 3H), 8.01 (d,  $J = 3.6$  Hz, 2H), 8.12 (s, 1H);  $^{13}\text{C}$  NMR (100MHz,  $\text{CDCl}_3$ )  $\delta$ : 13.1, 31.5, 96.0, 107.4, 128.7, 129.2, 130.9, 131.4, 144.7, 144.8, 149.6, 163.6. HRMS calcd for  $\text{C}_{14}\text{H}_{14}\text{N}_3$ : 224.1188 [M+H], found: 224.1185.

**2,5-dimethyl-7-phenylpyrazolo[1,5-*a*]pyrimidine (3m):** yellow solid.  $^1\text{H}$  NMR (400 MHz,  $\text{CDCl}_3$ )  $\delta$ : 2.49 (s, 3H), 2.60 (s, 3H), 6.41 (s, 1H), 6.66 (s, 1H), 7.53 (t,  $J = 2.8$  Hz, 3H), 8.00-8.03 (m, 2H);  $^{13}\text{C}$  NMR (100 MHz,  $\text{CDCl}_3$ )  $\delta$ : 14.8, 24.6, 95.2, 107.5, 128.6, 129.3, 130.8, 131.4, 145.6, 150.3, 154.9, 158.2. HRMS calcd for  $\text{C}_{14}\text{H}_{14}\text{N}_3$ : 224.1188 [M+H], found: 224.1185.

**7-(2-fluorophenyl)-2,5-dimethylpyrazolo[1,5-*a*]pyrimidine (3n):** yellow solid. <sup>1</sup>H NMR (400 MHz, CDCl<sub>3</sub>) δ: 2.44 (s, 3H), 2.57 (s, 3H), 6.40 (s, 1H), 6.64 (s, 1H), 7.20 (t, *J*=9.2 Hz, 1H), 7.26 (t, *J*=8.0 Hz, 1H), 7.44-7.48 (m, 1H), 7.75-7.78 (m, 1H); <sup>13</sup>C NMR (100 MHz, CDCl<sub>3</sub>) δ: 14.8, 24.7, 95.4, 109.3, 109.3, 116.3, 116.5, 119.4, 119.5, 124.3, 124.3, 131.2, 131.2, 132.4, 132.4, 140.6, 149.9, 154.9, 157.9, 158.7, 161.2. HRMS calcd for C<sub>14</sub>H<sub>13</sub>FN<sub>3</sub>: 242.1094 [M+H], found: 242.1099.

**7-(3-chlorophenyl)-2,5-dimethylpyrazolo[1,5-*a*]pyrimidine (3o):** yellow solid. <sup>1</sup>H NMR (400 MHz, CDCl<sub>3</sub>) δ: 2.50 (s, 3H), 2.61 (s, 3H), 6.43 (s, 1H), 6.66 (s, 1H), 7.47-7.51 (m, 2H), 7.92 (d, *J*=7.2 Hz, 1H), 8.01 (s, 1H); <sup>13</sup>C NMR (100 MHz, CDCl<sub>3</sub>) δ: 14.8, 24.7, 95.5, 107.6, 127.4, 129.3, 129.9, 130.9, 133.0, 134.7, 144.1, 150.2, 155.2, 158.3. HRMS calcd for C<sub>14</sub>H<sub>13</sub>ClN<sub>3</sub>: 258.0798 [M+H], found: 258.0805.

**7-(4-bromophenyl)-2,5-dimethylpyrazolo[1,5-*a*]pyrimidine (3p):** yellow solid. <sup>1</sup>H NMR (400 MHz, CDCl<sub>3</sub>) δ: 2.42 (s, 3H), 2.52 (s, 3H), 6.35 (s, 1H), 6.56 (s, 1H), 7.57 (d, *J* = 8.4 Hz, 2H), 7.84 (d, *J* = 8.8 Hz, 2H); <sup>13</sup>C NMR (100 MHz, CDCl<sub>3</sub>) δ: 14.8, 24.7, 95.4, 107.2, 125.3, 130.1, 130.8, 131.8, 144.2, 150.2, 154.9, 158.2. HRMS calcd for C<sub>14</sub>H<sub>13</sub>BrN<sub>3</sub>: 302.0293 [M+H], found: 302.0299.

**2,5-dimethyl-7-(4-(trifluoromethyl)phenyl)pyrazolo[1,5-*a*]pyrimidine (3q):** yellow solid. <sup>1</sup>H NMR (400 MHz, CDCl<sub>3</sub>) δ: 2.46 (s, 3H), 2.58 (s, 3H), 6.41 (s, 1H), 6.64 (s, 1H), 7.76 (d, *J* = 8.4 Hz, 2H), 8.11 (d, *J* = 8.4 Hz, 2H); <sup>13</sup>C NMR (100 MHz, CDCl<sub>3</sub>) δ: 14.7, 24.7, 95.6, 107.8, 119.7, 122.4, 125.1, 125.5, 125.6, 125.6, 125.6, 127.9, 129.7, 131.9, 132.2, 132.6, 132.9, 134.8, 143.9, 150.3, 155.1, 158.3. HRMS calcd for C<sub>14</sub>H<sub>13</sub>F<sub>3</sub>N<sub>3</sub>: 292.1062 [M+H], found: 292.1068.

**2,5-dimethyl-7-*p*-tolylpyrazolo[1,5-*a*]pyrimidine (3r):** yellow solid. <sup>1</sup>H NMR (400 MHz, CDCl<sub>3</sub>) δ: 2.42 (s, 3H), 2.48 (s, 3H), 2.58 (s, 3H), 6.39 (s, 1H), 6.63 (s, 1H), 7.32 (d, *J* = 7.6 Hz, 2H), 7.91 (d, *J* = 8.4 Hz, 2H); <sup>13</sup>C NMR (100 MHz, CDCl<sub>3</sub>) δ: 14.9, 21.6, 24.7, 95.1, 107.1, 128.4, 129.2, 129.3, 141.2, 145.7, 150.3, 154.8, 158.2. HRMS calcd for C<sub>15</sub>H<sub>16</sub>N<sub>3</sub>: 238.1344 [M+H], found: 238.1341.

**7-(3,4-dimethoxyphenyl)-2,5-dimethylpyrazolo[1,5-*a*]pyrimidine (3s):** yellow solid. <sup>1</sup>H NMR (400 MHz, CDCl<sub>3</sub>) δ: 2.44 (s, 3H), 2.53 (s, 3H), 3.89 (s, 3H), 3.90 (s, 3H), 6.34 (s, 1H), 6.60 (s, 1H), 6.93 (d, *J* = 8.4 Hz, 1H), 7.59 (dd, *J*<sub>1</sub> = 8.4 Hz, *J*<sub>2</sub> = 1.6 Hz, 1H), 7.64 (d, *J*<sub>1</sub> = 1.2 Hz, 1H); <sup>13</sup>C NMR (100 MHz, CDCl<sub>3</sub>) δ: 14.8, 24.6, 55.9, 56.0, 94.9, 106.7, 110.8, 112.1, 122.6, 123.5, 145.2, 148.5, 150.4, 151.1, 154.6, 158.1. HRMS calcd for C<sub>16</sub>H<sub>18</sub>N<sub>3</sub>O<sub>2</sub>: 284.1399 [M+H], found: 284.1403.

**2,5-dimethyl-7-(naphthalen-1-yl)pyrazolo[1,5-*a*]pyrimidine (3t):** yellow solid. <sup>1</sup>H NMR (400 MHz, CDCl<sub>3</sub>) δ: 2.37 (s, 3H), 2.59 (s, 3H), 6.48 (s, 1H), 6.60 (s, 1H), 7.33-7.37 (m, 1H), 7.42-7.47 (m, 2H), 7.53 (t, *J* = 8.0 Hz, 1H), 7.64 (d, *J* = 6.4 Hz, 1H), 7.87 (d, *J* = 8.4 Hz, 1H), 7.96 (d, *J* = 8.0 Hz, 1H); <sup>13</sup>C NMR (100 MHz, CDCl<sub>3</sub>) δ: 14.9, 24.7, 95.4, 109.9, 125.3, 125.3, 126.4, 126.9, 127.9, 128.6, 129.4, 130.7, 130.8, 133.6, 145.3, 150.0, 155.1, 158.1. HRMS calcd for C<sub>18</sub>H<sub>16</sub>N<sub>3</sub>: 274.1344 [M+H], found: 274.1341.

**2,5-dimethyl-7-(thiophen-2-yl)pyrazolo[1,5-*a*]pyrimidine (3u):** yellow solid. <sup>1</sup>H NMR (400MHz, CDCl<sub>3</sub>) δ: 2.55 (s, 3H), 2.60 (s, 3H), 6.40 (s, 1H), 6.98 (s, 1H), 7.21-7.23 (m, 1H), 7.65 (d, *J* = 4.4 Hz, 1H), 8.31 (d, *J* = 2.0 Hz, 1H); <sup>13</sup>C NMR (100MHz, CDCl<sub>3</sub>) δ: 14.9, 24.7, 95.1, 103.9, 127.6, 131.3, 131.6, 131.8, 138.8, 150.3, 154.8, 157.5. HRMS calcd for C<sub>12</sub>H<sub>12</sub>N<sub>3</sub>S: 230.0752 [M+H], found: 230.0758.

**7-benzyl-2,5-dimethylpyrazolo[1,5-*a*]pyrimidine (3v):** yellow solid. <sup>1</sup>H NMR (400MHz, CDCl<sub>3</sub>) δ: 2.37 (s, 3H), 2.47 (s, 3H), 4.36 (s, 2H), 6.03 (s, 1H), 6.32 (s, 1H), 7.22-7.30 (m, 5H); <sup>13</sup>C NMR (100MHz, CDCl<sub>3</sub>) δ: 14.7, 24.6, 36.1, 95.2, 106.7, 127.3, 128.8, 129.8, 134.9, 147.6, 149.3, 154.4, 158.1. HRMS calcd for C<sub>15</sub>H<sub>16</sub>N<sub>3</sub>: 238.1344 [M+H], found: 238.1345.

**2,5-dimethyl-7-phenethylpyrazolo[1,5-*a*]pyrimidine (3w):** yellow solid. <sup>1</sup>H NMR (400MHz, CDCl<sub>3</sub>) δ: 2.42 (s, 3H), 2.46 (s, 3H), 3.08 (t, *J* = 8.0 Hz, 2H), 3.31 (t, *J* = 8.0 Hz, 2H), 6.26 (s, 1H), 6.31 (s, 1H), 7.13-7.24 (m, 5H); <sup>13</sup>C NMR (100MHz, CDCl<sub>3</sub>) δ: 14.7, 24.6, 31.8, 32.0, 95.0, 106.3, 126.4, 128.4, 128.5, 140.2, 147.3, 149.3, 154.3, 157.9. HRMS calcd for C<sub>16</sub>H<sub>18</sub>N<sub>3</sub>: 252.1501 [M+H], found: 252.1509.

**5-ethyl-2-methyl-7-phenylpyrazolo[1,5-*a*]pyrimidine (3x):** yellow solid.  $^1\text{H}$  NMR (400MHz,  $\text{CDCl}_3$ )  $\delta$ : 1.38 (t,  $J = 8.0$  Hz, 3H), 2.50 (s, 3H), 2.87 (q,  $J = 8.0$  Hz, 2H), 6.44 (s, 1H), 6.69 (s, 1H), 7.54 (t,  $J = 3.2$  Hz, 3H), 8.02 (d,  $J = 4.0$  Hz, 2H);  $^{13}\text{C}$  NMR (100MHz,  $\text{CDCl}_3$ )  $\delta$ : 13.2, 14.8, 31.5, 95.3, 106.5, 128.6, 129.2, 130.8, 131.5, 145.9, 150.3, 154.9, 163.2. HRMS calcd for  $\text{C}_{15}\text{H}_{16}\text{N}_3$ : 238.1344 [M+H], found: 238.1348.

**2-cyclopropyl-5-methyl-7-phenylpyrazolo[1,5-*a*]pyrimidine (3y):** yellow solid.  $^1\text{H}$  NMR (400MHz,  $\text{CDCl}_3$ )  $\delta$ : 0.85-0.87 (m, 2H), 0.95-0.99 (m, 2H), 2.06-2.10 (m, 1H), 2.50 (s, 3H), 6.20 (s, 1H), 6.56 (s, 1H), 7.44 (d,  $J = 2.4$  Hz, 3H), 7.97-7.98 (m, 2H);  $^{13}\text{C}$  NMR (100MHz,  $\text{CDCl}_3$ )  $\delta$ : 9.3, 10.2, 24.6, 91.2, 107.2, 128.4, 129.3, 130.7, 131.3, 145.2, 150.4, 158.2, 161.3. HRMS calcd for  $\text{C}_{16}\text{H}_{16}\text{N}_3$ : 250.1344 [M+H], found: 250.1341.

**7-(3-chlorophenyl)-2-cyclopropyl-5-methylpyrazolo[1,5-*a*]pyrimidine (3z):** yellow solid.  $^1\text{H}$  NMR (400MHz,  $\text{CDCl}_3$ )  $\delta$ : 0.81-0.85 (m, 2H), 0.96-1.00 (m, 2H), 2.04-2.08 (m, 1H), 2.51 (s, 3H), 6.18 (s, 1H), 6.55 (s, 1H), 7.33-7.41 (m, 2H), 7.84 (d,  $J = 7.2$  Hz, 1H), 7.98 (s, 1H);  $^{13}\text{C}$  NMR (100MHz,  $\text{CDCl}_3$ )  $\delta$ : 9.5, 10.2, 24.6, 91.4, 107.3, 127.4, 129.3, 129.7, 130.7, 132.9, 134.4, 143.6, 150.2, 158.2, 161.5. HRMS calcd for  $\text{C}_{16}\text{H}_{15}\text{ClN}_3$ : 284.0955 [M+H], found: 284.0953.

**2-cyclopropyl-7-(4-methoxyphenyl)-5-methylpyrazolo[1,5-*a*]pyrimidine (3aa):** yellow solid.  $^1\text{H}$  NMR (400MHz,  $\text{CDCl}_3$ )  $\delta$ : 0.81-0.84 (m, 2H), 0.93-0.97 (m, 2H), 2.03-2.08 (m, 1H), 2.46 (s, 3H), 3.75 (s, 3H), 6.14 (s, 1H), 6.50 (s, 1H), 6.91 (d,  $J = 8.8$  Hz, 2H), 7.97 (d,  $J = 8.8$  Hz, 2H);  $^{13}\text{C}$  NMR (100MHz,  $\text{CDCl}_3$ )  $\delta$ : 9.3, 10.2, 24.6, 55.3, 90.9, 106.3, 113.8, 123.3, 130.9, 144.9, 150.4, 158.0, 161.1, 161.5. HRMS calcd for  $\text{C}_{17}\text{H}_{18}\text{N}_3\text{O}$ : 280.1450 [M+H], found: 280.1453.

**4-(2-cyclopropyl-5-methylpyrazolo[1,5-*a*]pyrimidin-7-yl)benzotrile (3bb):** yellow solid.  $^1\text{H}$  NMR (400MHz,  $\text{CDCl}_3$ )  $\delta$ : 0.81-0.83 (m, 2H), 0.97-1.01 (m, 2H), 2.03-2.07 (m, 1H), 2.56 (s, 3H), 6.20 (s, 1H), 6.64 (s, 1H), 7.76 (d,  $J = 7.6$  Hz, 2H), 8.13 (d,  $J = 8.0$  Hz, 2H);  $^{13}\text{C}$  NMR (100MHz,  $\text{CDCl}_3$ )  $\delta$ : 9.5, 10.2,



24.7, 91.8, 107.7, 114.2, 118.2, 129.9, 132.2, 135.6, 143.0, 143.0, 150.2, 158.3, 161.8, 161.8. HRMS calcd for C<sub>17</sub>H<sub>15</sub>N<sub>4</sub>: 275.1297 [M+H], found: 275.1295.

**2-cyclopropyl-5-methyl-7-(thiophen-2-yl)pyrazolo[1,5-*a*]pyrimidine (3cc):** yellow solid; <sup>1</sup>H NMR (400MHz, CDCl<sub>3</sub>) δ: 0.98-1.07 (m, 4H), 2.12-2.15 (m, 1H), 2.53 (s, 3H), 6.27 (s, 1H), 6.91 (s, 1H), 7.15 (t, *J* = 4.0 Hz, 1H), 7.60 (d, *J* = 4.8 Hz, 1H), 8.19 (d, *J* = 4.0 Hz, 1H); <sup>13</sup>C NMR (100MHz, CDCl<sub>3</sub>) δ: 9.7, 10.2, 24.7, 92.0, 103.3, 127.3, 130.9, 131.6, 131.9, 138.5, 150.1, 157.4, 161.0. HRMS calcd for C<sub>14</sub>H<sub>14</sub>N<sub>3</sub>S: 256.0908 [M+H], found: 256.0903.

**7-benzyl-2-cyclopropyl-5-methylpyrazolo[1,5-*a*]pyrimidine (3dd):** yellow solid. <sup>1</sup>H NMR (400MHz, CDCl<sub>3</sub>) δ: 0.90-0.94 (m, 2H), 1.01-1.06 (m, 2H), 2.11-2.15 (m, 1H), 2.41 (s, 3H), 4.38 (s, 2H), 6.06 (s, 1H), 6.20 (s, 1H), 7.26-7.35 (m, 5H); <sup>13</sup>C NMR (100MHz, CDCl<sub>3</sub>) δ: 9.3, 10.2, 24.6, 36.1, 91.5, 106.5, 127.3, 128.8, 129.9, 135.0, 147.6, 149.2, 158.1, 161.0. HRMS calcd for C<sub>17</sub>H<sub>18</sub>N<sub>3</sub>: 264.1501 [M+H], found: 264.1505.

**2-cyclopropyl-5-methyl-7-phenethylpyrazolo[1,5-*a*]pyrimidine (3ee):** yellow solid. <sup>1</sup>H NMR (400MHz, CDCl<sub>3</sub>) δ: 0.90-0.91 (m, 2H), 1.02 (d, *J* = 8.4 Hz, 2H), 2.09-2.12 (m, 1H), 2.44 (s, 3H), 3.10 (t, *J* = 8.4 Hz, 2H), 3.31 (t, *J* = 8.0 Hz, 2H), 6.18 (s, 1H), 6.28 (s, 1H), 7.17 (d, *J* = 6.8 Hz, 2H), 7.25 (t, *J* = 6.8 Hz, 3H); <sup>13</sup>C NMR (100MHz, CDCl<sub>3</sub>) δ: 9.4, 10.2, 24.6, 31.8, 32.1, 91.3, 106.2, 126.4, 128.4, 128.5, 140.4, 147.2, 149.3, 157.9, 160.9. HRMS calcd for C<sub>18</sub>H<sub>19</sub>N<sub>3</sub>: 278.1657 [M+H], found: 278.1653.

**2-cyclopropyl-5-ethyl-7-phenylpyrazolo[1,5-*a*]pyrimidine (3ff):** yellow solid; <sup>1</sup>H NMR (400MHz, CDCl<sub>3</sub>) δ: 0.86-0.90 (m, 2H), 1.01-1.06 (m, 2H), 1.37 (t, *J* = 7.6 Hz, 3H), 2.11-2.15 (m, 1H), 2.86 (q, *J* = 7.6 Hz, 2H), 6.24 (s, 1H), 6.68 (s, 1H), 7.54 (t, *J* = 7.6 Hz, 3H), 8.04-8.06 (m, 2H); <sup>13</sup>C NMR (100MHz, CDCl<sub>3</sub>) δ: 9.4, 10.2, 13.2, 31.4, 91.1, 106.3, 128.5, 129.3, 130.8, 131.5, 145.7, 150.3, 161.6, 163.1. HRMS calcd for C<sub>17</sub>H<sub>18</sub>N<sub>3</sub>: 264.1501 [M+H], found: 264.1508.

**5-methyl-2,7-diphenylpyrazolo[1,5-*a*]pyrimidine (3gg):** yellow solid.  $^1\text{H}$  NMR (400MHz,  $\text{CDCl}_3$ )  $\delta$ : 2.61 (s, 3H), 6.71 (s, 1H), 6.94 (s, 1H), 7.36 (t,  $J = 7.2$  Hz, 1H), 7.44 (t,  $J = 7.2$  Hz, 2H), 7.53-7.56 (m, 3H), 8.00-8.02 (m, 2H), 8.11-8.14 (m, 2H);  $^{13}\text{C}$  NMR (100MHz,  $\text{CDCl}_3$ )  $\delta$ : 24.8, 92.5, 108.2, 126.6, 128.5, 128.7, 128.8, 129.5, 130.9, 131.1, 133.1, 145.6, 150.8, 155.6, 158.6. HRMS calcd for  $\text{C}_{19}\text{H}_{16}\text{N}_3$ : 286.1344 [M+H], found: 286.1348.

**7-(4-bromophenyl)-5-methyl-2-phenylpyrazolo[1,5-*a*]pyrimidine (3hh):** yellow solid.  $^1\text{H}$  NMR (400MHz,  $\text{CDCl}_3$ )  $\delta$ : 2.62 (s, 3H), 6.71 (s, 1H), 6.92 (s, 1H), 7.37 (t,  $J = 7.6$  Hz, 1H), 7.44 (t,  $J = 8.0$  Hz, 2H), 7.68-7.70 (m, 2H), 7.96-7.98 (m, 2H), 8.01-8.03 (m, 2H);  $^{13}\text{C}$  NMR (100MHz,  $\text{CDCl}_3$ )  $\delta$ : 24.8, 92.7, 107.9, 125.4, 126.5, 128.7, 128.9, 129.9, 131.0, 131.8, 132.9, 144.5, 150.7, 155.7, 158.6. HRMS calcd for  $\text{C}_{19}\text{H}_{15}\text{BrN}_3$ : 364.0449 [M+H], found: 364.0455.

**5,6-dimethyl-7-phenylpyrazolo[1,5-*a*]pyrimidine (3ii):** yellow solid.  $^1\text{H}$  NMR (400MHz,  $\text{CDCl}_3$ )  $\delta$ : 2.14 (s, 3H), 2.62 (s, 3H), 6.58 (d,  $J = 2.0$  Hz, 1H), 7.45-7.47 (m, 2H), 7.53-7.57 (m, 3H), 7.95 (d,  $J = 2.0$  Hz, 1H);  $^{13}\text{C}$  NMR (100MHz,  $\text{CDCl}_3$ )  $\delta$ : 15.1, 24.1, 95.5, 114.9, 128.9, 129.4, 129.9, 130.9, 144.0, 147.4, 159.6. HRMS calcd for  $\text{C}_{14}\text{H}_{14}\text{N}_3$ : 224.1188 [M+H], found: 224.1185.

**2,5,6-trimethyl-7-phenylpyrazolo[1,5-*a*]pyrimidine (3jj):** yellow solid.  $^1\text{H}$  NMR (400 MHz,  $\text{CDCl}_3$ )  $\delta$ : 2.08 (s, 3H), 2.39 (s, 3H), 2.57 (s, 3H), 6.35 (s, 1H), 7.44-7.54 (m, 5H);  $^{13}\text{C}$  NMR (100 MHz,  $\text{CDCl}_3$ )  $\delta$ : 14.9, 15.1, 24.1, 94.8, 113.9, 128.8, 129.6, 129.8, 131.0, 143.5, 148.2, 154.0, 159.1. HRMS calcd for  $\text{C}_{15}\text{H}_{16}\text{N}_3$ : 238.1344 [M+H], found: 238.1342.

**2-cyclopropyl-5,6-dimethyl-7-phenylpyrazolo[1,5-*a*]pyrimidine (3kk):** yellow solid.  $^1\text{H}$  NMR (400MHz,  $\text{CDCl}_3$ )  $\delta$ : 0.74-0.77 (m, 2H), 0.93-0.96 (m, 2H), 2.01-2.03 (m, 1H), 2.08 (d,  $J = 1.2$  Hz, 3H), 2.55 (d,  $J = 2.0$  Hz, 3H), 6.11 (s, 1H), 7.45-7.54 (m, 5H);  $^{13}\text{C}$  NMR (100MHz,  $\text{CDCl}_3$ )  $\delta$ : 9.4, 10.2, 15.1, 24.0, 90.0, 113.7, 128.6, 129.7, 129.7, 130.9, 143.4, 148.2, 159.0, 160.7. HRMS calcd for  $\text{C}_{17}\text{H}_{18}\text{N}_3$ : 264.1501 [M+H], found: 264.1498.

**6-ethyl-2,5-dimethyl-7-phenylpyrazolo[1,5-*a*]pyrimidine (3ll):** yellow solid. <sup>1</sup>H NMR (400 MHz, CDCl<sub>3</sub>) δ: 1.05 (t, *J* = 7.6 Hz, 3H), 2.39 (s, 3H), 2.47 (q, *J* = 7.2 Hz, 2H), 2.64 (s, 3H), 6.36 (s, 1H), 7.41-7.43 (m, 2H), 7.53-7.56 (m, 3H); <sup>13</sup>C NMR (100 MHz, CDCl<sub>3</sub>) δ: 14.8, 14.8, 21.7, 23.2, 94.7, 120.7, 128.9, 129.1, 129.6, 131.1, 143.9, 148.1, 154.3, 158.6. HRMS calcd for C<sub>16</sub>H<sub>18</sub>N<sub>3</sub>: 252.1501 [M+H], found: 252.1503.

**6,7-dimethyl-5-phenylpyrazolo[1,5-*a*]pyrimidine (4ii):** yellow solid. <sup>1</sup>H NMR (400 MHz, CDCl<sub>3</sub>) δ: 2.32 (s, 3H), 2.86 (s, 3H), 6.67 (d, *J* = 2.0 Hz, 1H), 7.46-7.53 (m, 5H), 8.10 (d, *J* = 2.4 Hz, 1H); <sup>13</sup>C NMR (100 MHz, CDCl<sub>3</sub>) δ: 14.1, 15.5, 96.7, 113.4, 128.4, 128.7, 128.7, 128.9, 139.7, 144.0, 146.9, 159.5. HRMS calcd for C<sub>14</sub>H<sub>14</sub>N<sub>3</sub>: 224.1188 [M+H], found: 224.1181.

**2,6,7-trimethyl-5-phenylpyrazolo[1,5-*a*]pyrimidine (4jj):** yellow solid. <sup>1</sup>H NMR (400 MHz, CDCl<sub>3</sub>) δ: 2.26 (s, 3H), 2.52 (s, 3H), 2.80 (s, 3H), 6.43 (s, 1H), 7.43-7.51 (m, 5H); <sup>13</sup>C NMR (100 MHz, CDCl<sub>3</sub>) δ: 14.2, 14.7, 15.5, 95.8, 112.5, 128.3, 128.6, 128.7, 139.7, 143.4, 147.6, 154.2, 159.1. HRMS calcd for C<sub>15</sub>H<sub>16</sub>N<sub>3</sub>: 238.1344 [M+H], found: 238.1351.

**2-cyclopropyl-6,7-dimethyl-5-phenylpyrazolo[1,5-*a*]pyrimidine (4kk):** yellow solid. <sup>1</sup>H NMR (400 MHz, CDCl<sub>3</sub>) δ: 0.88-0.92 (m, 2H), 1.02-1.07 (m, 2H), 2.12-2.16 (m, 1H), 2.24 (s, 3H), 2.79 (s, 3H), 6.25 (s, 1H), 7.40-7.50 (m, 5H); <sup>13</sup>C NMR (100 MHz, CDCl<sub>3</sub>) δ: 9.2, 10.2, 14.1, 15.5, 91.8, 112.3, 128.3, 128.6, 128.7, 139.8, 143.4, 147.6, 159.0, 160.8. HRMS calcd for C<sub>17</sub>H<sub>18</sub>N<sub>3</sub>: 264.1501 [M+H], found: 264.1505.

**6-ethyl-2,7-dimethyl-5-phenylpyrazolo[1,5-*a*]pyrimidine (4ll):** yellow solid. <sup>1</sup>H NMR (400 MHz, CDCl<sub>3</sub>) δ: 1.06 (t, *J* = 7.2 Hz, 3H), 2.54 (s, 3H), 2.68 (q, *J* = 7.2 Hz, 2H), 2.84 (s, 3H), 6.44 (s, 1H), 7.44-7.47 (m, 5H); <sup>13</sup>C NMR (100 MHz, CDCl<sub>3</sub>) δ: 13.9, 14.7, 15.1, 21.6, 95.8, 119.1, 128.2, 128.3, 128.5, 139.9, 143.3, 147.4, 154.4, 159.3. HRMS calcd for C<sub>16</sub>H<sub>18</sub>N<sub>3</sub>: 252.1501 [M+H], found: 252.1504.

**1-butyl-5-(5-methylpyrazolo[1,5-*a*]pyrimidin-7-yl)-4-(methylthio)pyrimidin-2(1*H*)-one (7):** yellow solid. <sup>1</sup>H NMR (400MHz, CDCl<sub>3</sub>) δ: 0.90 (t, *J* = 8.0 Hz, 3H), 1.35 (sext, *J* = 7.2 Hz, 2H), 1.73 (quint, *J* = 7.2 Hz, 2H), 2.47 (s, 3H), 2.58 (s, 3H), 3.86 (t, *J* = 7.2 Hz, 2H), 6.57 (d, *J* = 2.4 Hz, 1H), 6.86 (s, 1H), 7.99 (d, *J* = 2.4 Hz, 1H), 8.00 (s, 1H); <sup>13</sup>C NMR (100MHz, CDCl<sub>3</sub>) δ: 13.5, 13.7, 19.7, 24.8, 30.8, 51.2, 96.6, 107.1, 110.6, 138.5, 144.5, 146.9, 149.1, 153.1, 158.4, 175.6. HRMS calcd for C<sub>16</sub>H<sub>20</sub>N<sub>5</sub>OS: 330.1389 [M+H], found: 330.1382.

**((2*R*,3*S*,5*R*)-3-acetoxy-5-(5-(2,5-dimethylpyrazolo[1,5-*a*]pyrimidin-7-yl)-4-(methylthio)-2-oxopyrimidin-1(2*H*)-yl)tetrahydrofuran-2-yl)methyl acetate (11):** yellowish solid. <sup>1</sup>H NMR (400 MHz, CDCl<sub>3</sub>) δ: 1.54 (s, 3H), 2.00 (s, 3H), 2.13-2.20 (m, 1H), 2.32 (s, 3H), 2.42 (s, 3H), 2.49 (s, 3H), 2.71-2.77 (m, 1H), 4.17 (d, *J* = 2.8 Hz, 2H), 4.23-4.25 (m, 1H), 5.12-5.13 (m, 1H), 6.21 (t, *J* = 6.8 Hz, 1H), 6.30 (s, 1H), 6.70 (s, 1H), 8.28 (s, 1H); <sup>13</sup>C NMR (100 MHz, CDCl<sub>3</sub>) δ: 13.5, 14.6, 20.0, 20.8, 24.6, 38.8, 63.5, 74.0, 82.9, 87.3, 95.9, 107.7, 109.6, 137.9, 141.6, 149.7, 152.1, 154.8, 157.9, 169.9, 170.2, 176.4. HRMS calcd for C<sub>22</sub>H<sub>26</sub>N<sub>5</sub>O<sub>6</sub>S: 488.1604 [M+H], found: 488.1609.

## 2.2 General procedure for the preparation of nucleoside-pyrazolo[1,5-*a*]pyrimidine chimeras **8** and **12**

A sealed tube (50 mL) containing compound **7** or **11** (0.5 mmol), *i*-PrOH (5 mL), NH<sub>3</sub>·H<sub>2</sub>O (1 mL) and a magnetic stirring bar was heated to 90 °C for 8 h. The resulting mixture was then concentrated under vacuum, and the residue was purified by chromatography on silica gel to afford the nucleoside-pyrazolo[1,5-*a*]pyrimidine chimera **8** or **12**.

**4-amino-1-butyl-5-(5-methylpyrazolo[1,5-*a*]pyrimidin-7-yl)pyrimidin-2(1*H*)-one (8):** white solid. <sup>1</sup>H NMR (400 MHz, DMSO) δ: 0.88 (t, *J* = 7.2 Hz, 3H), 1.22-1.30 (m, 2H), 1.55-1.62 (m, 2H), 2.52 (s, 3H), 3.70 (t, *J* = 7.6 Hz, 2H), 6.58 (s, 1H), 6.94 (s, 1H), 8.09 (s, 1H), 8.13 (s, 1H); <sup>13</sup>C NMR (100 MHz,

DMSO)  $\delta$ : 14.1, 19.7, 24.7, 31.3, 49.1, 95.9, 98.1, 111.0, 140.3, 144.4, 149.0, 149.1, 155.2, 158.8, 162.8.

HRMS calcd for  $C_{15}H_{19}N_6O$ : 299.1620 [M+H], found: 299.1656.

**4-amino-5-(2,5-dimethylpyrazolo[1,5-*a*]pyrimidin-7-yl)-1-((2R,4S,5R)-4-hydroxy-5-**

**(hydroxymethyl)tetrahydrofuran-2-yl)pyrimidin-2(1*H*)-one (12):** white solid.  $^1H$  NMR (400 MHz,

DMSO)  $\delta$ : 2.02-2.08 (m, 1H), 2.18-2.22 (m, 1H), 2.35 (s, 3H), 2.48 (s, 3H), 3.46-3.54 (m, 2H), 3.77 (s,

1H), 4.19 (s, 1H), 4.90 (t,  $J = 4.4$  Hz, 1H), 5.22 (d,  $J = 2.8$  Hz, 1H), 6.18 (t,  $J = 6.0$  Hz, 1H), 6.37 (s, 1H),

6.69 (br., 1H), 6.81 (s, 1H), 7.48 (br., 1H), 8.28 (s, 1H);  $^{13}C$  NMR (100 MHz, DMSO)  $\delta$ : 14.9, 24.7, 41.2,

61.5, 70.5, 85.8, 87.9, 95.2, 99.3, 110.1, 139.8, 143.7, 149.8, 153.7, 154.5, 158.5, 162.5. MS:  $m/z$  373

(MH) $^+$ . HRMS calcd for  $C_{17}H_{21}N_6O_4$ : 373.1624 [M+H], found: 373.1628.

### III. Copies of $^1\text{H}$ and $^{13}\text{C}$ NMR spectra of 3a-3ll, 4ii-4ll, 7, 8, 11, 12

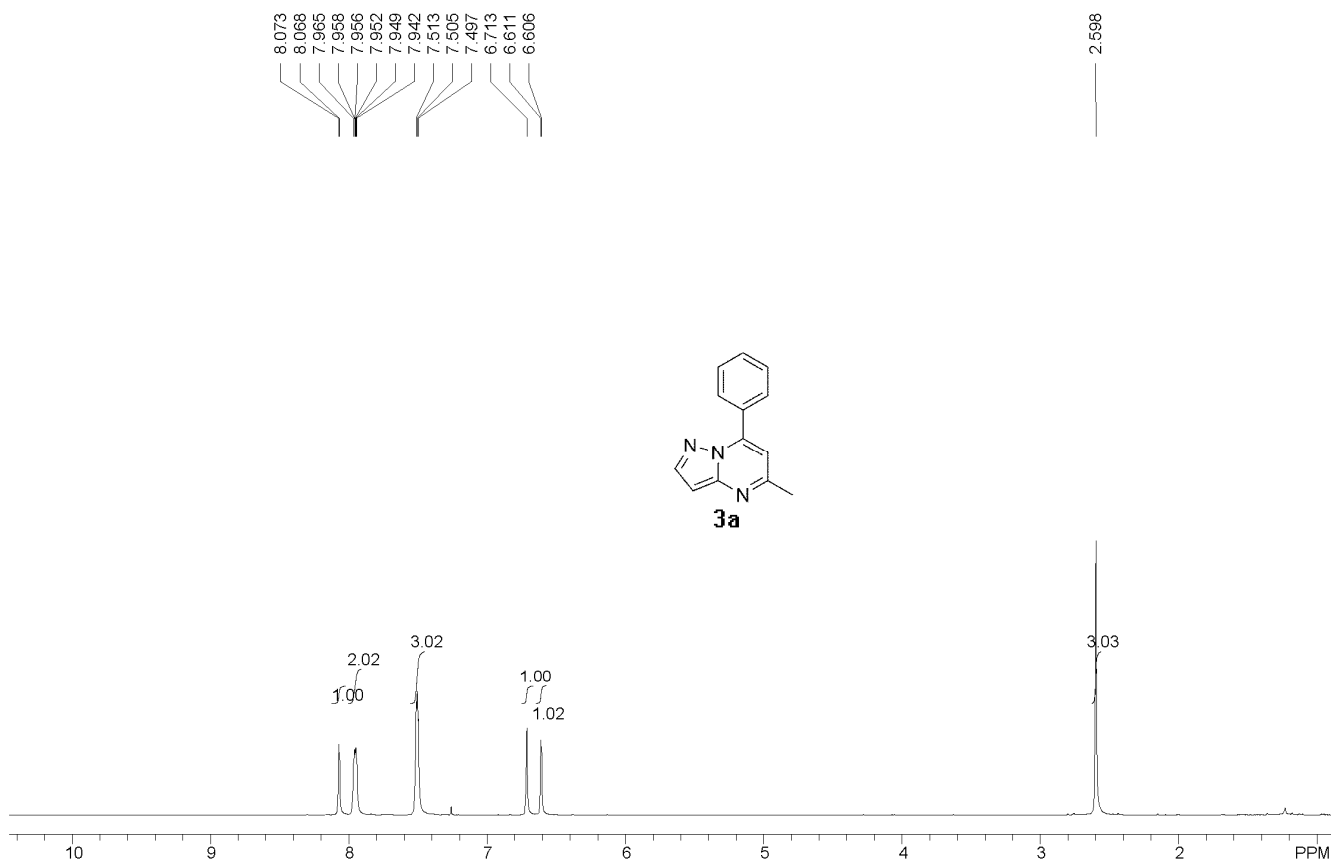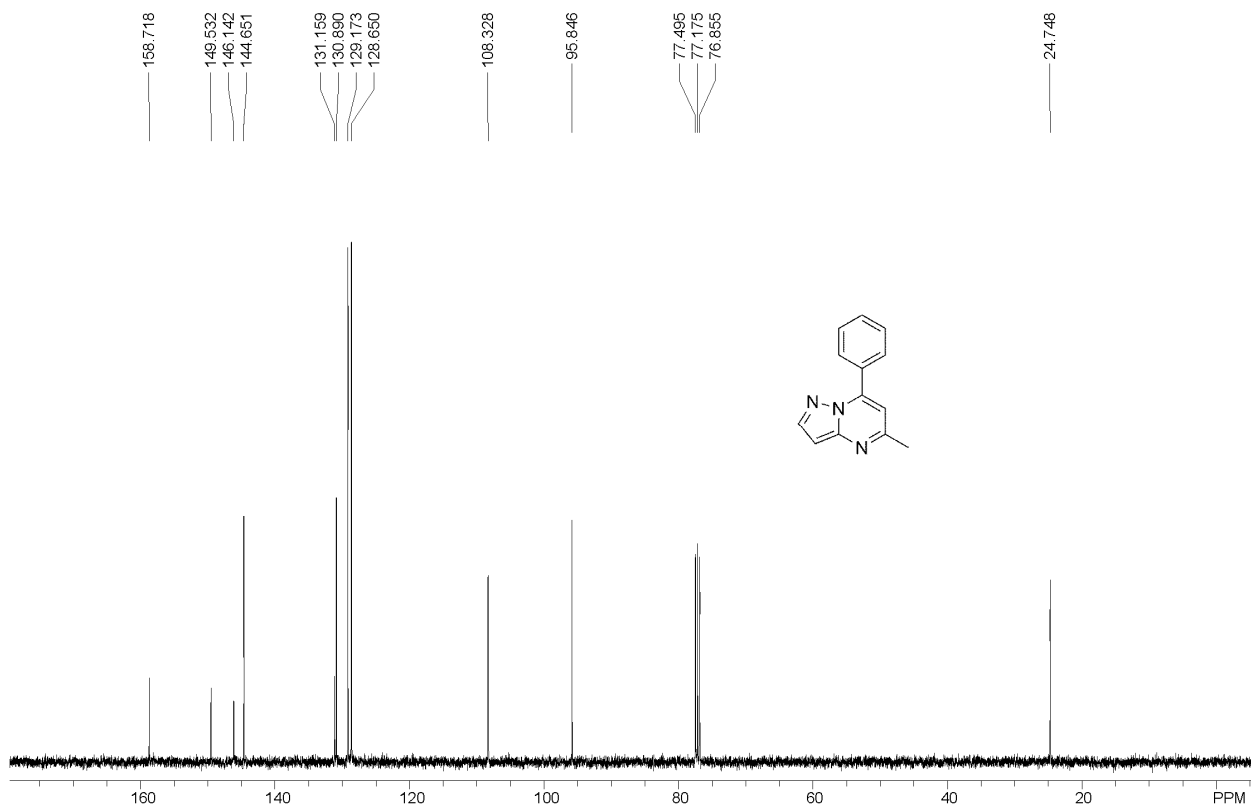

8.062  
8.041  
8.029  
8.024  
7.744  
7.723

6.704  
6.598  
6.592

2.581

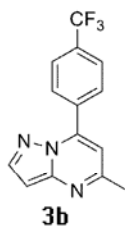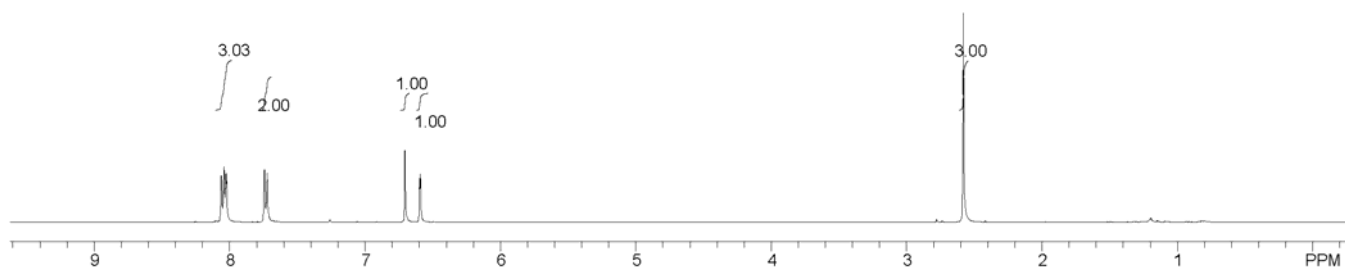

158.747

144.739

149.423

144.411

134.556

132.941

132.814

132.286

131.986

129.692

127.748

125.609

125.573

125.537

125.493

125.042

122.329

119.623

108.597

96.203

77.503

77.183

76.863

24.675

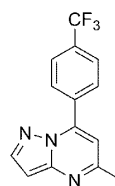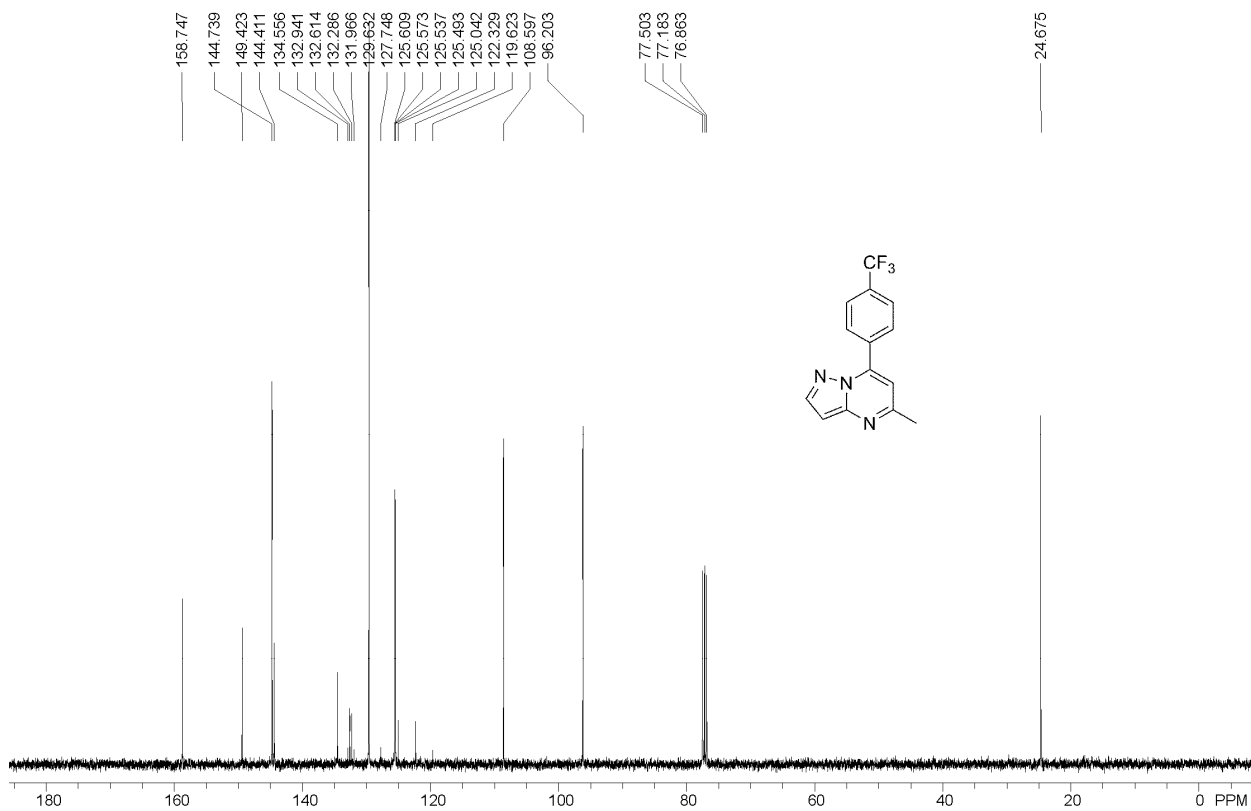

8.026  
8.020  
7.830  
7.814  
7.809  
7.601  
7.585  
7.580  
  
6.660  
6.578  
6.573

2.565

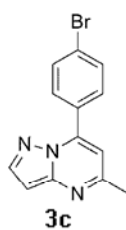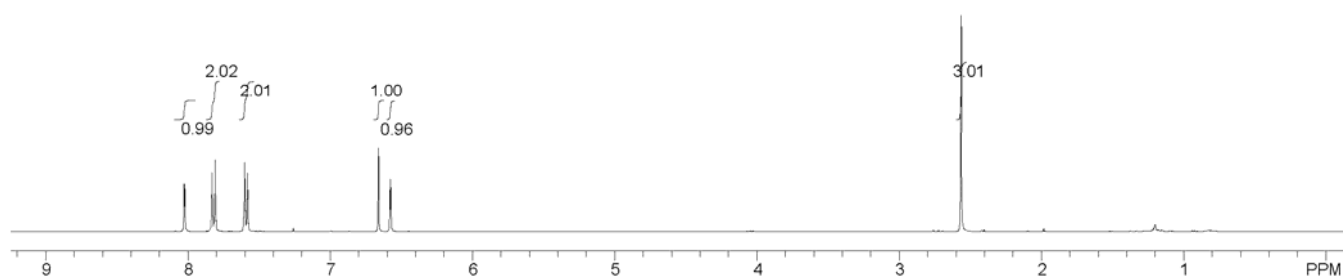

158.638  
149.481  
144.840  
144.637

131.850  
130.715  
129.908  
125.391

108.088

96.043

77.546  
77.226  
76.906

24.763

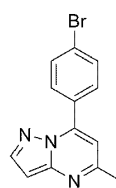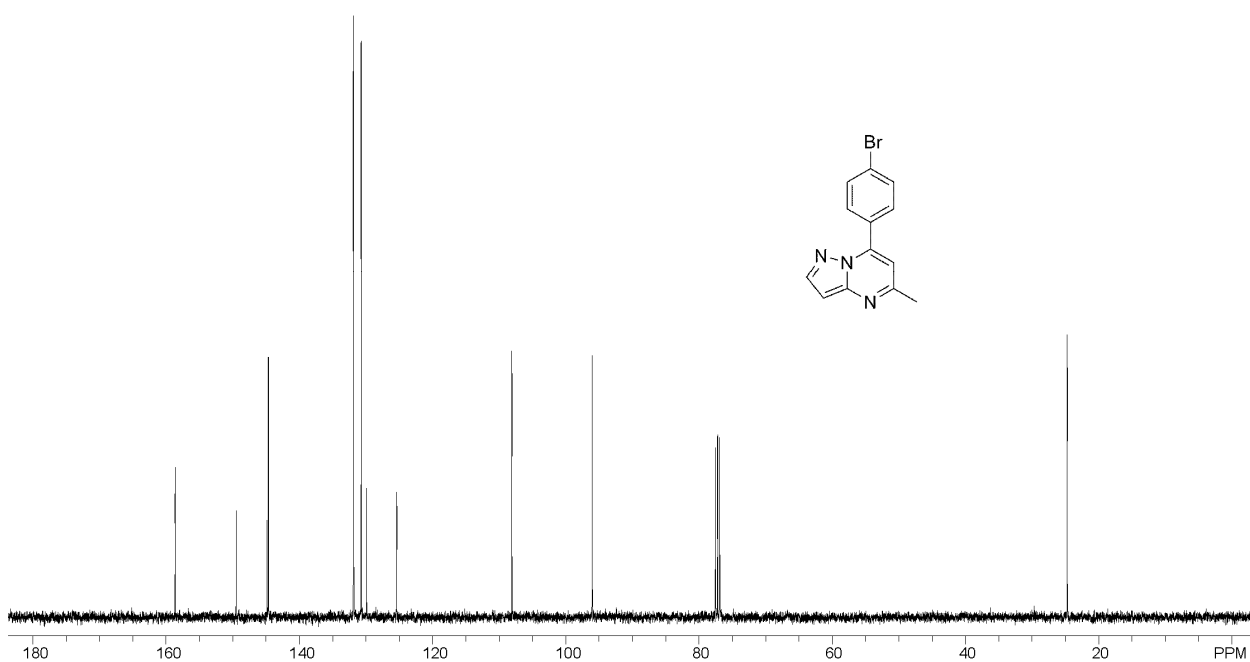



8.026  
8.020  
7.943  
7.921

6.964  
6.942  
6.630  
6.545  
6.540

3.782

2.527

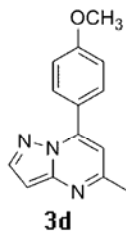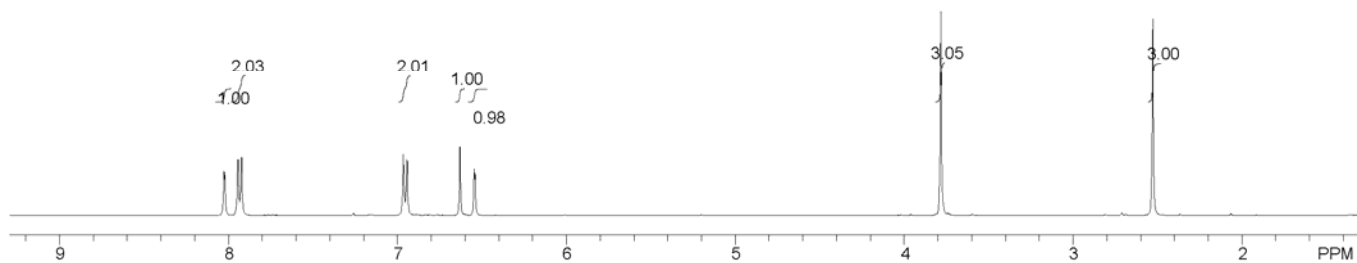

161.555  
158.565  
149.612  
145.764  
144.426

130.854  
123.195  
113.950  
107.440

95.585

77.583  
77.263  
76.943

55.399

24.690

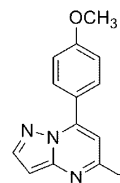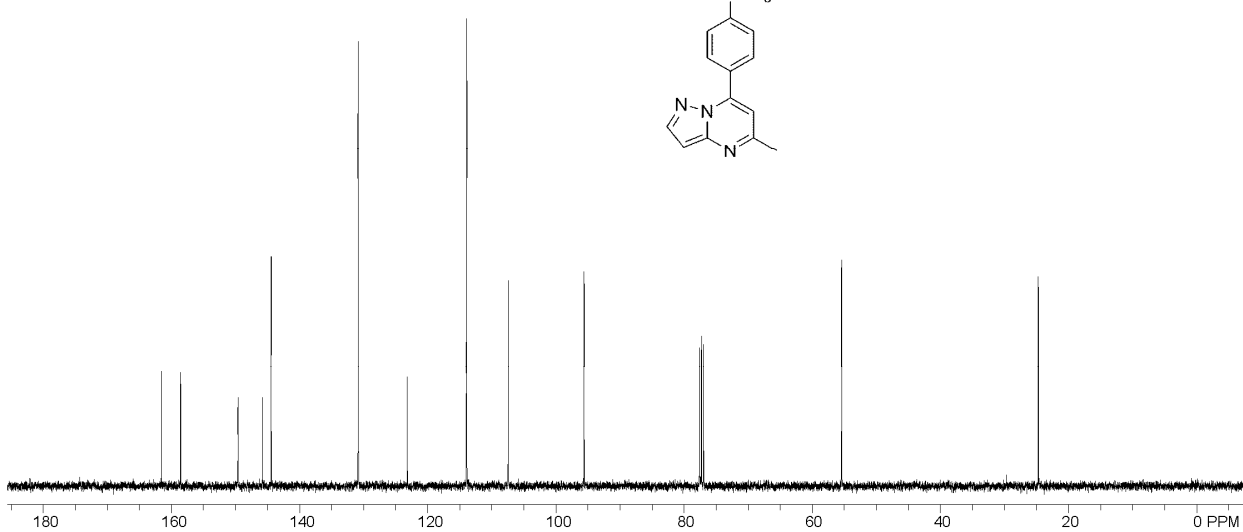

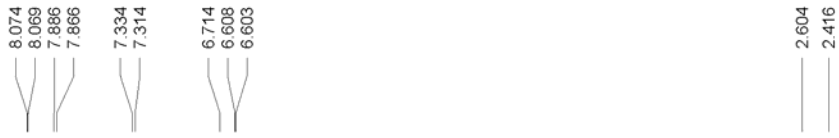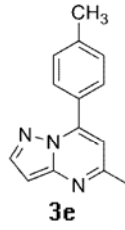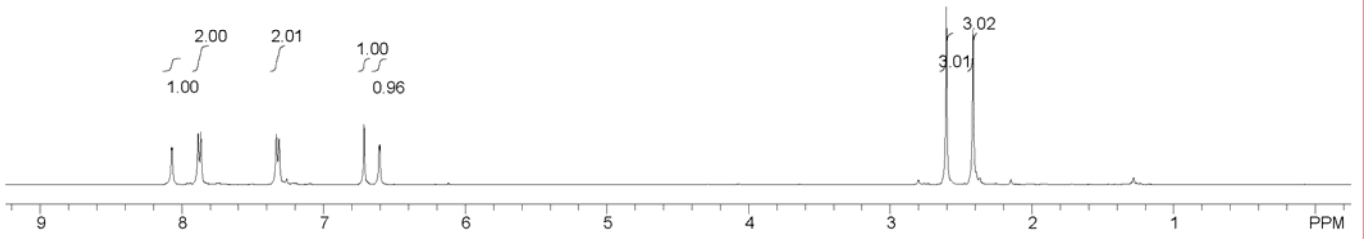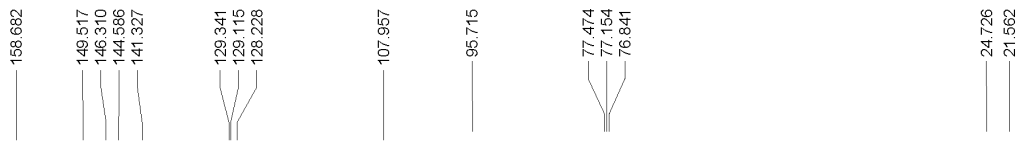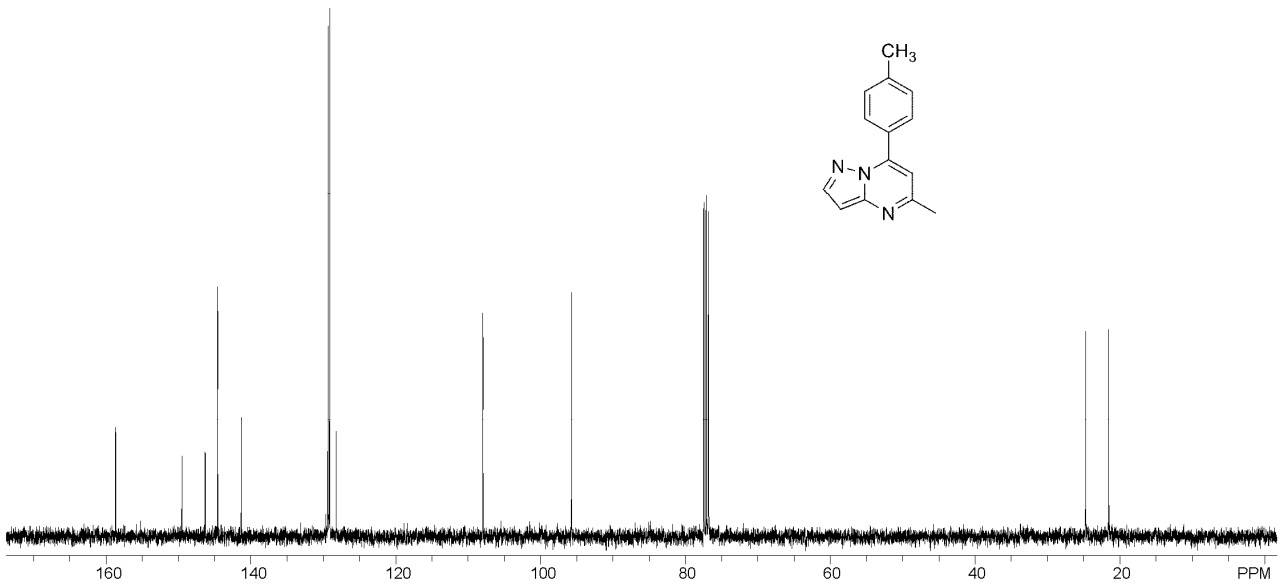

8.030  
8.025  
7.929  
7.828  
7.809  
7.437  
7.417  
7.397  
7.378  
7.358  
6.665  
6.578  
6.572

2.559

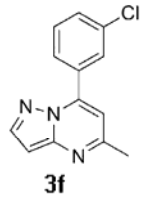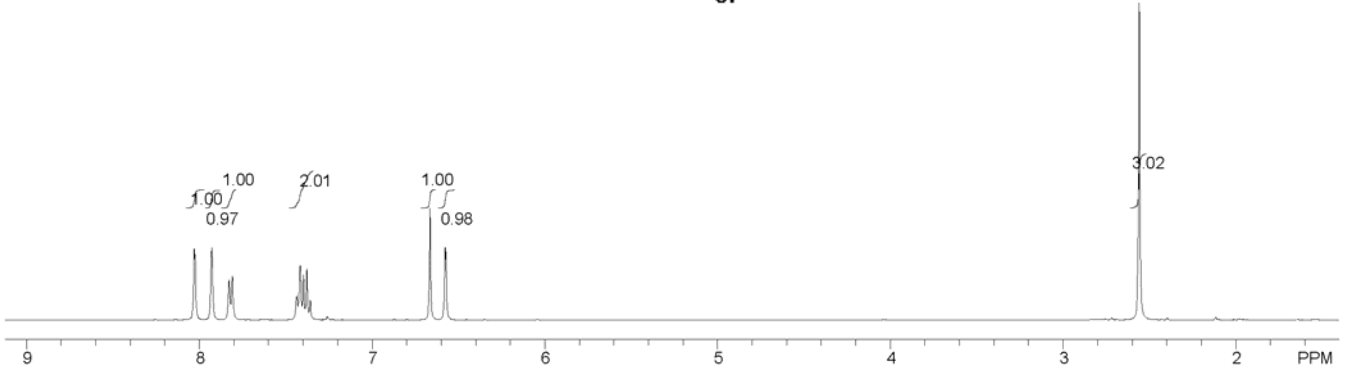

158.653  
149.452  
144.688  
144.426  
134.566  
132.716  
130.868  
129.864  
129.188  
127.340  
108.400  
96.079  
77.564  
77.234  
76.921  
24.748

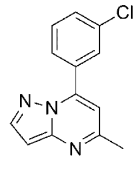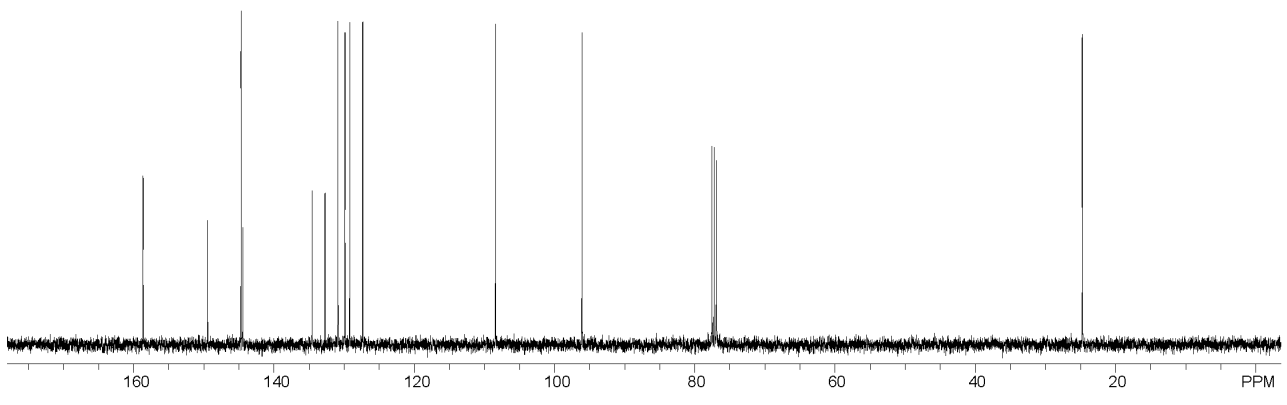

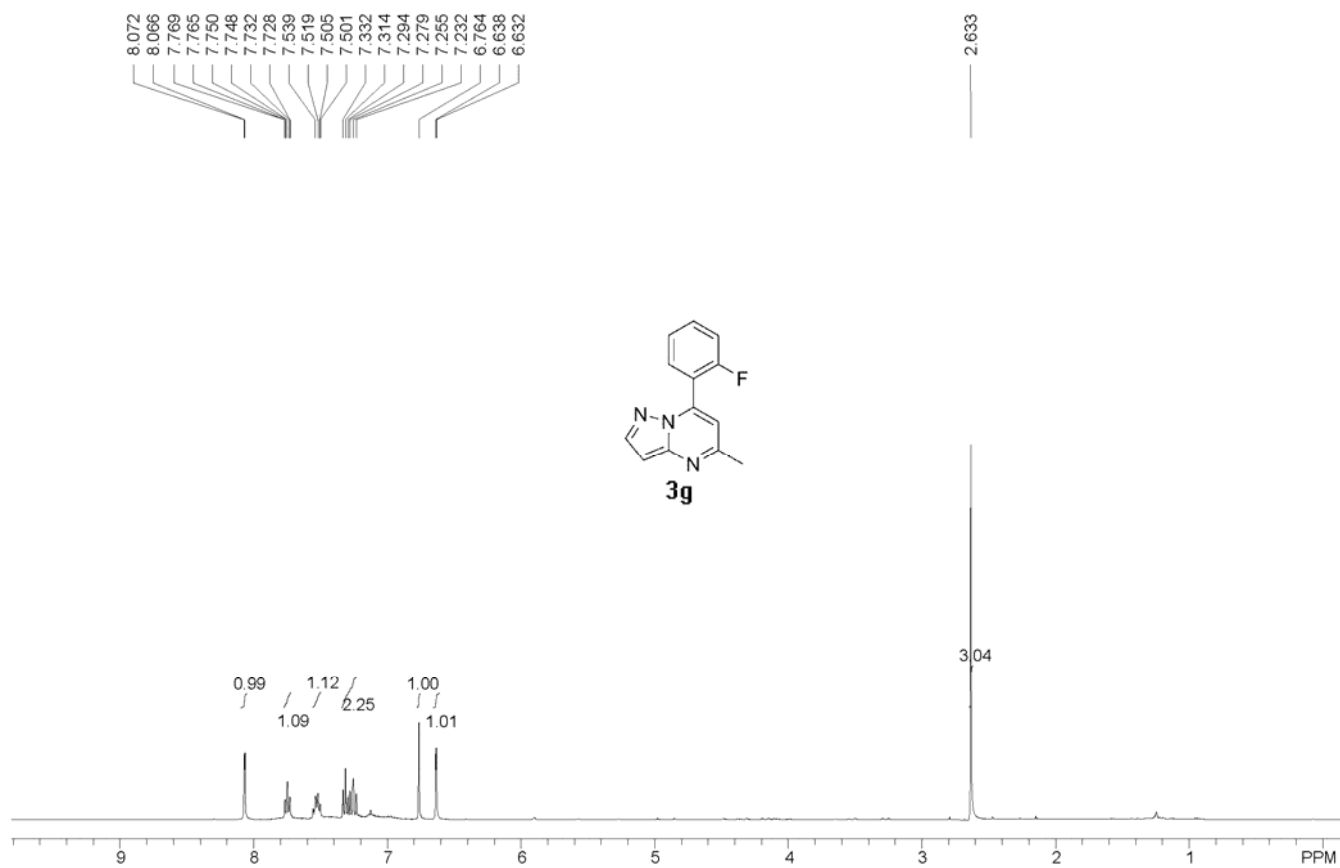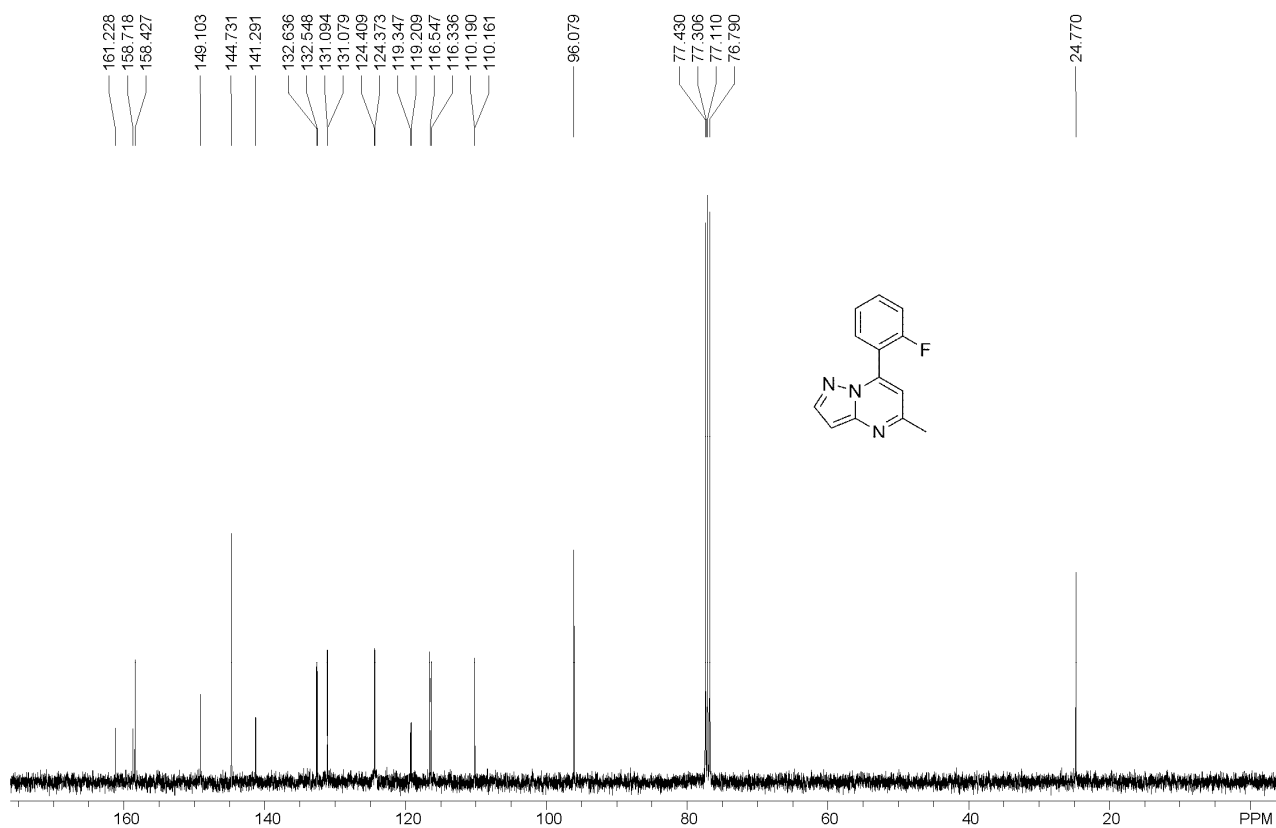

8.009  
8.004  
7.980  
7.904  
7.883  
7.638  
7.622  
7.567  
7.547  
7.529  
7.491  
7.486  
7.472  
7.457  
7.452  
7.376  
7.363  
6.716  
6.691  
6.686

2.628

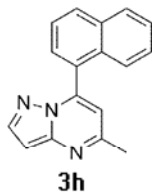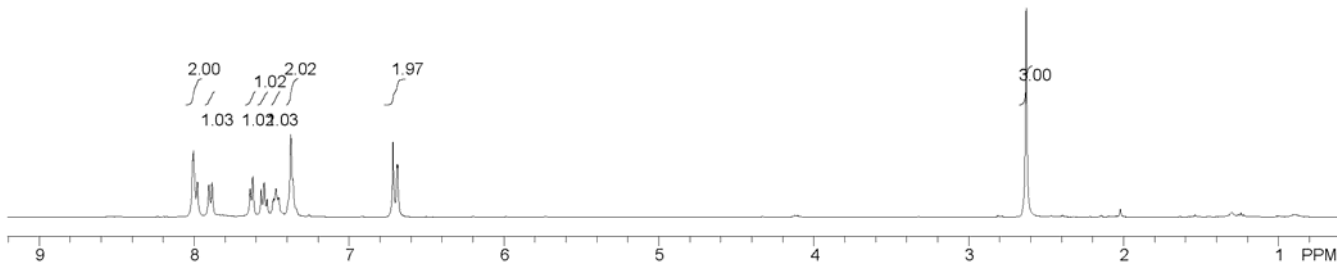

158.587  
149.255  
145.961  
144.935  
130.963  
133.581  
130.686  
129.312  
128.715  
127.857  
127.028  
126.540  
125.231  
125.100  
110.561

95.934

77.689  
77.379  
77.069

24.799

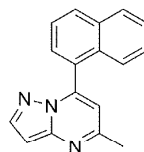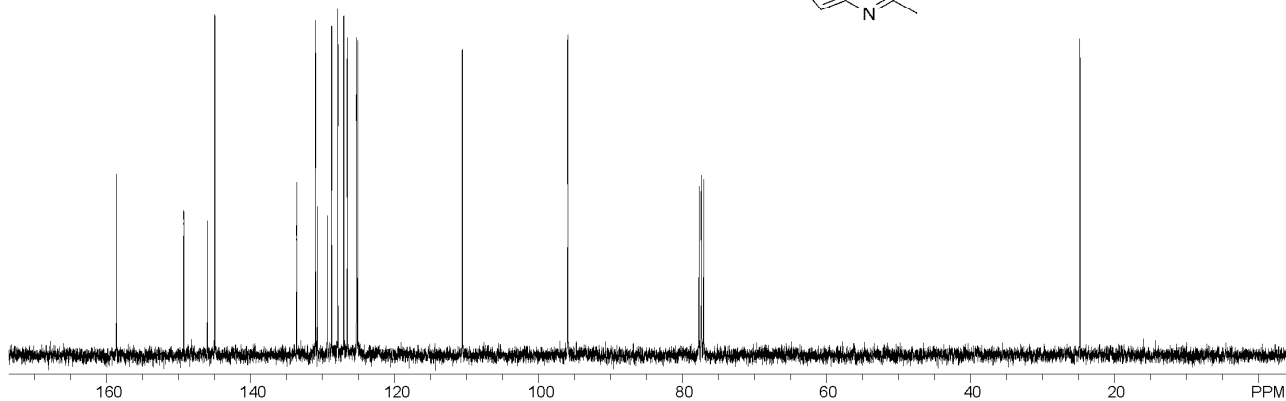

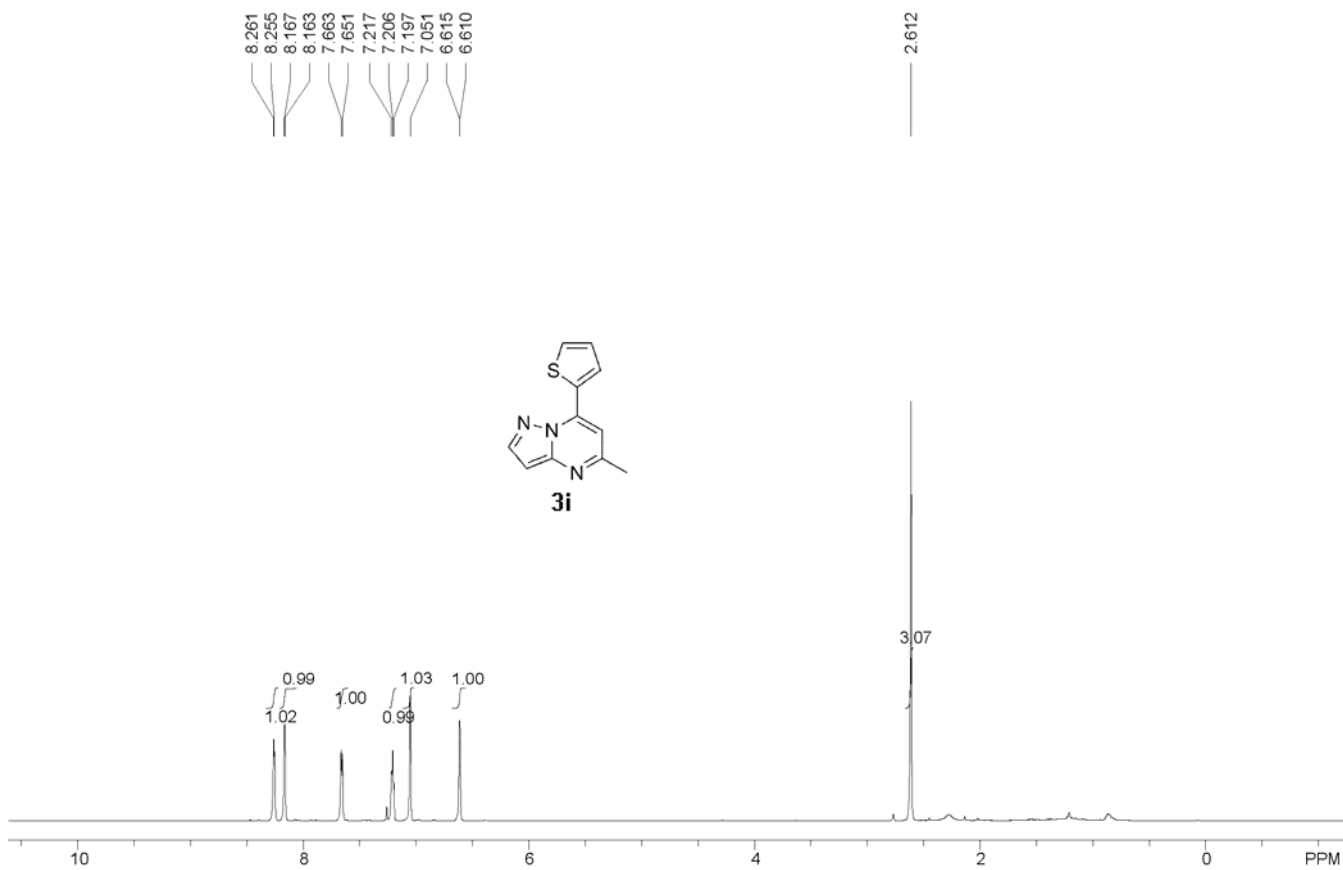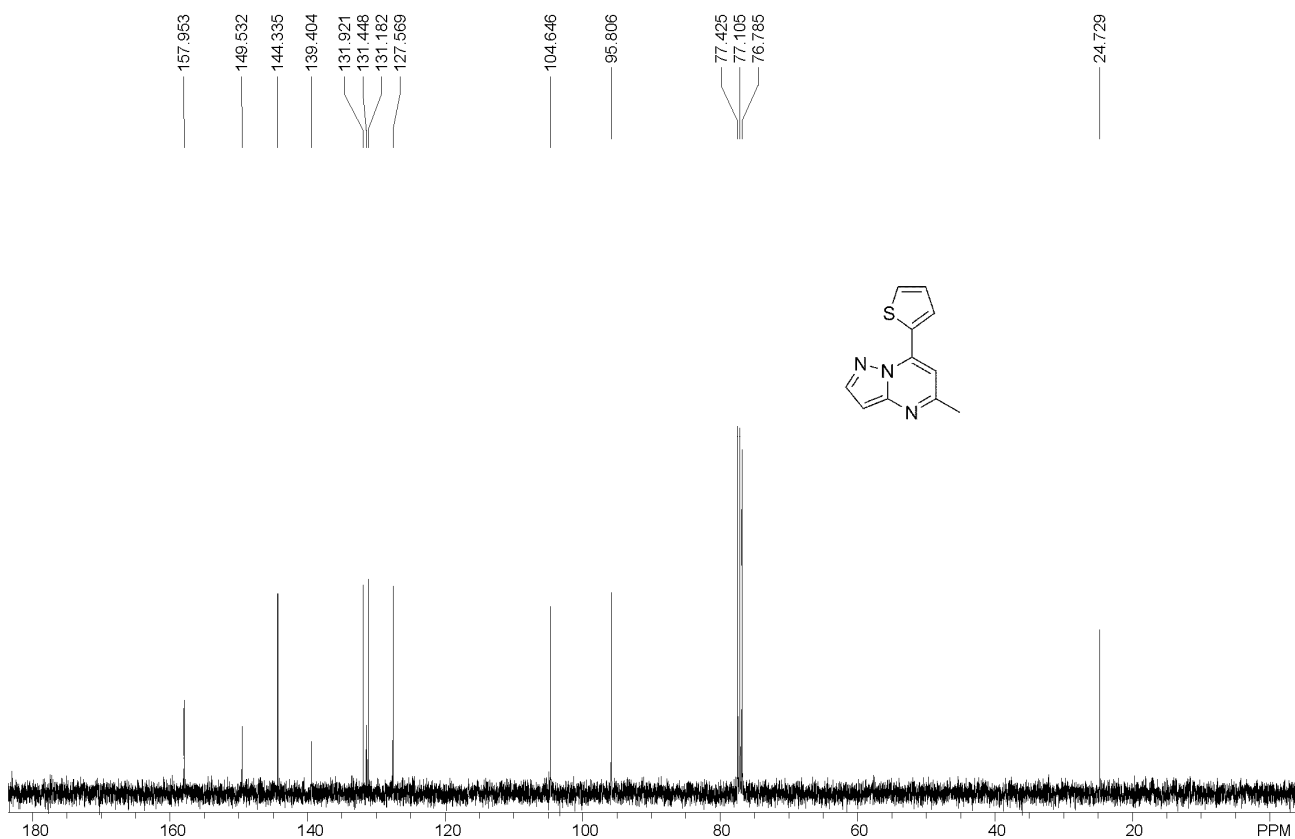

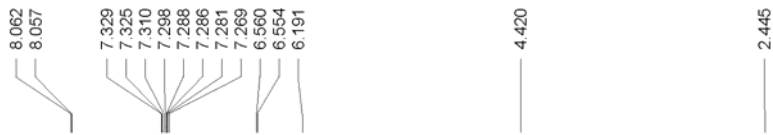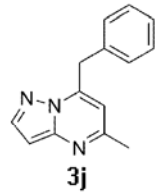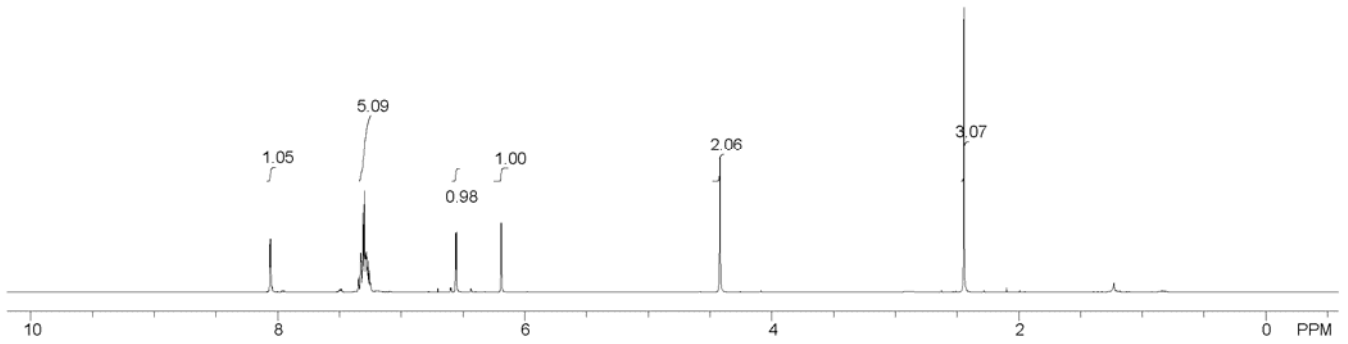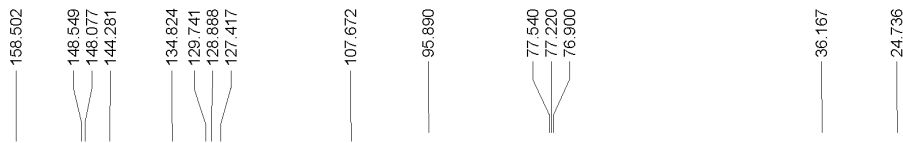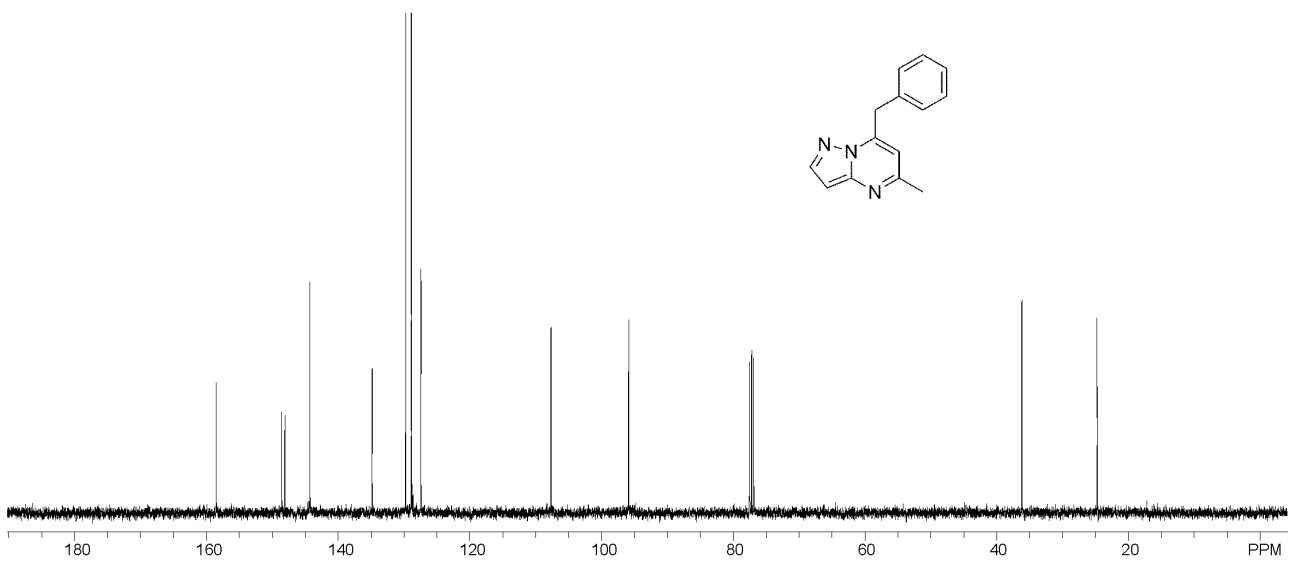

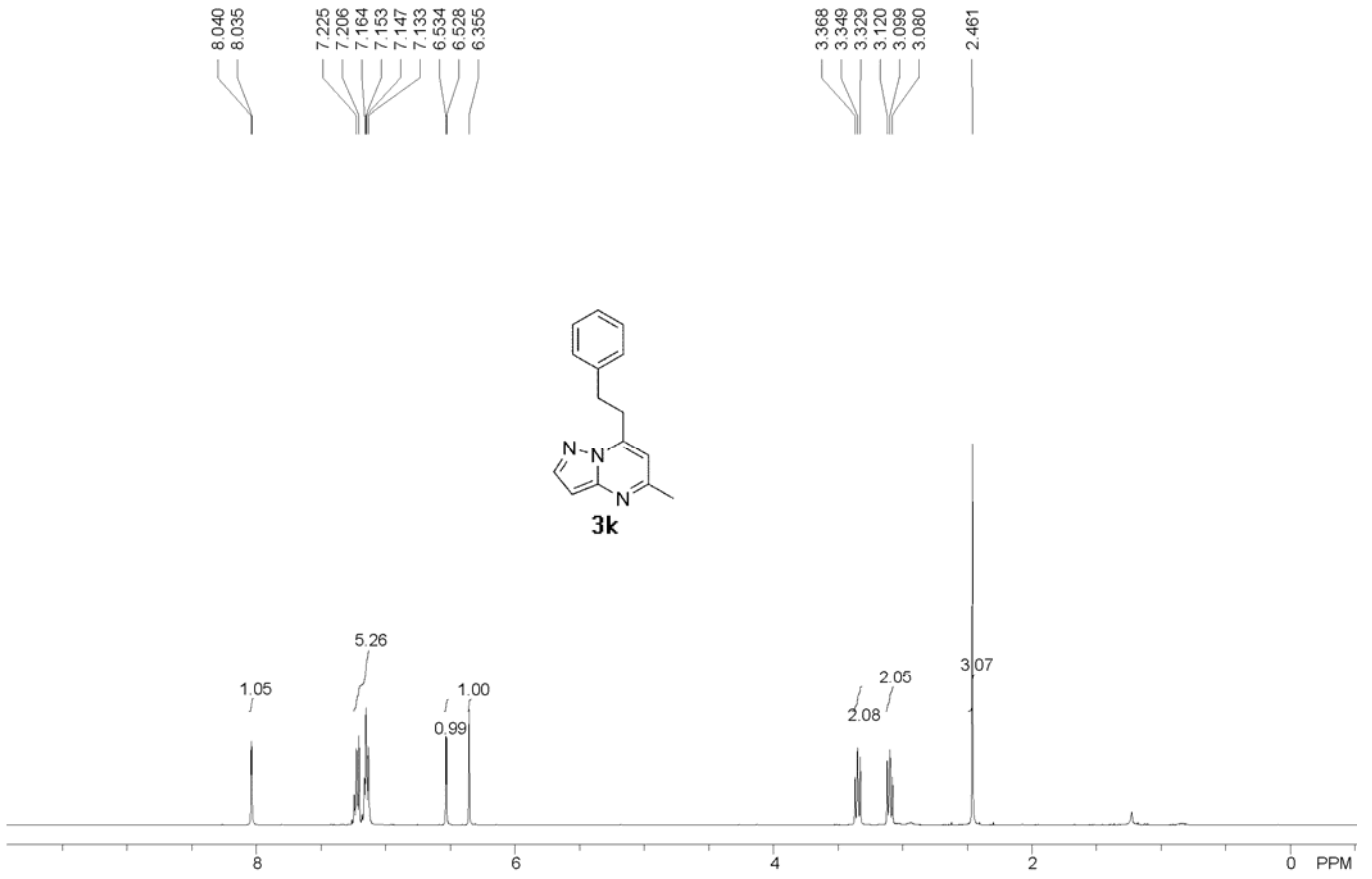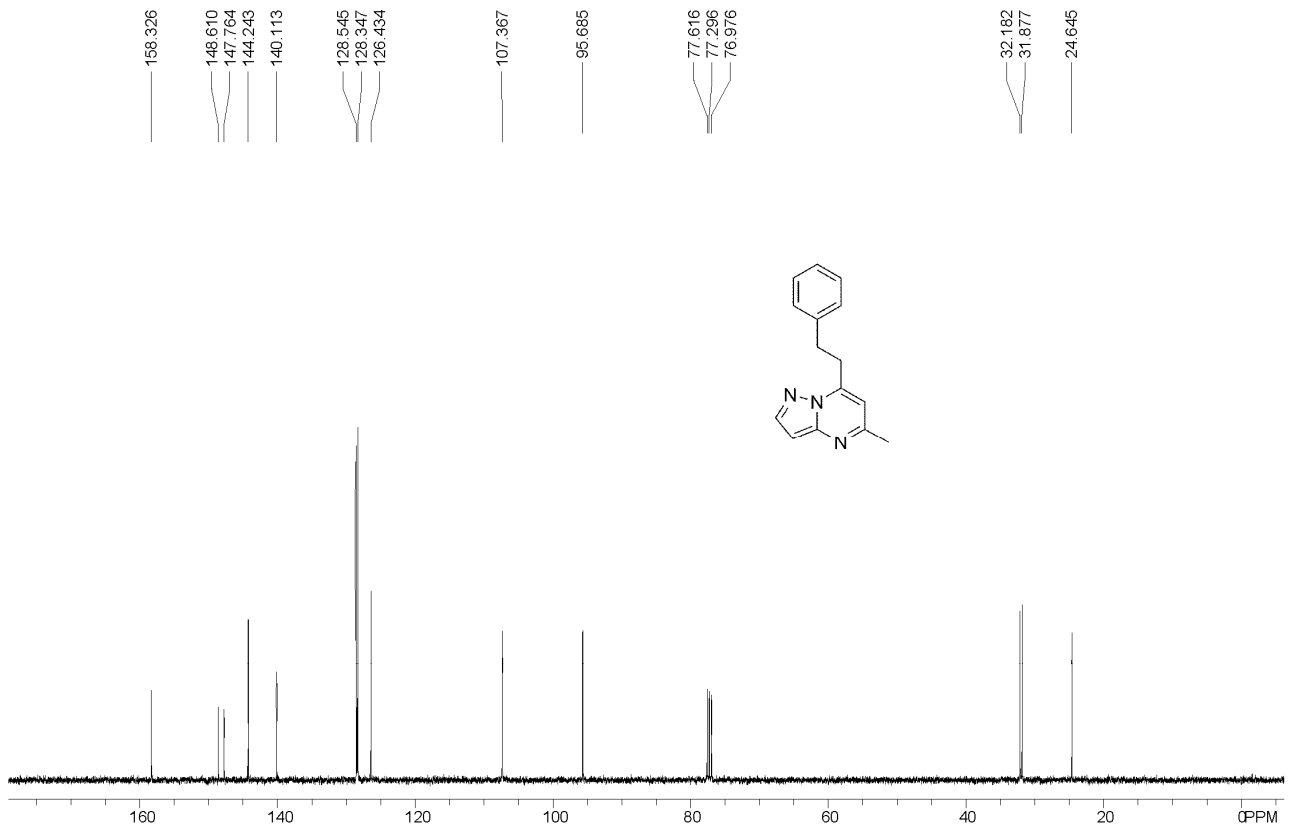



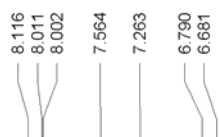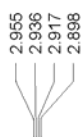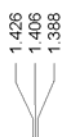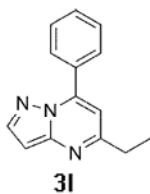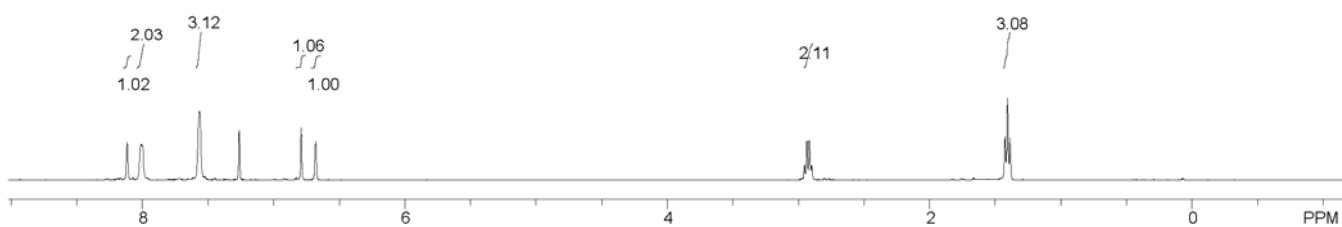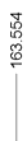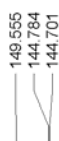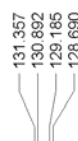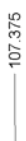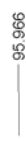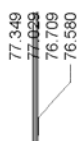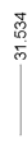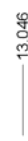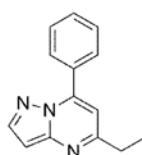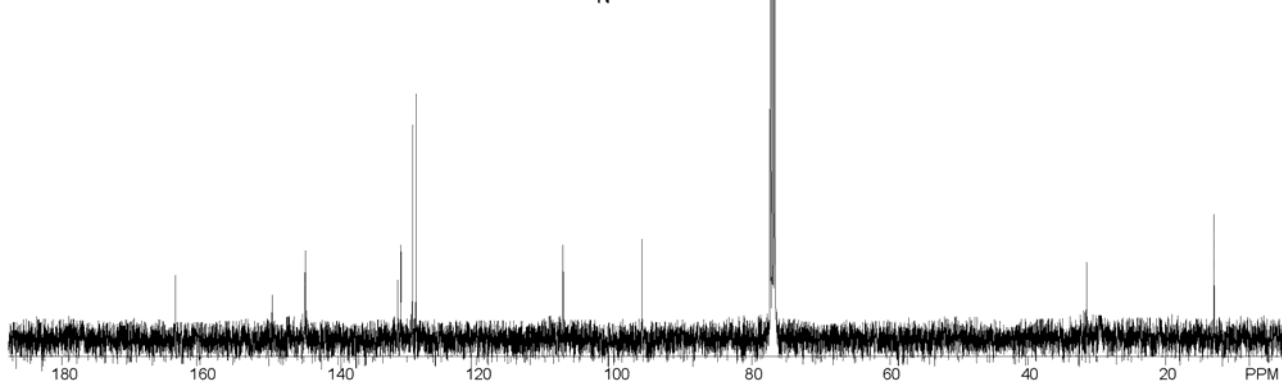

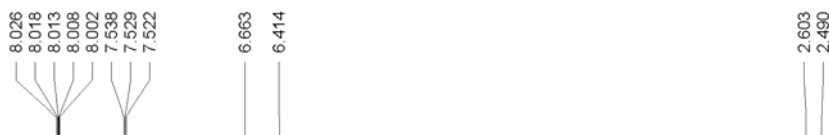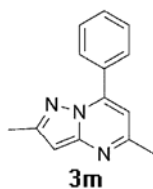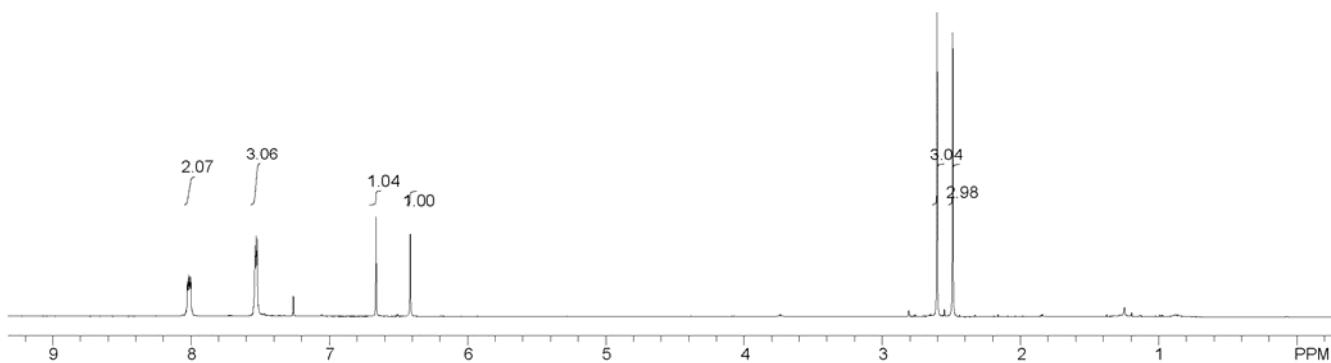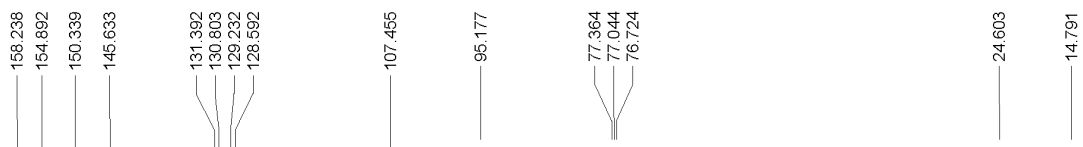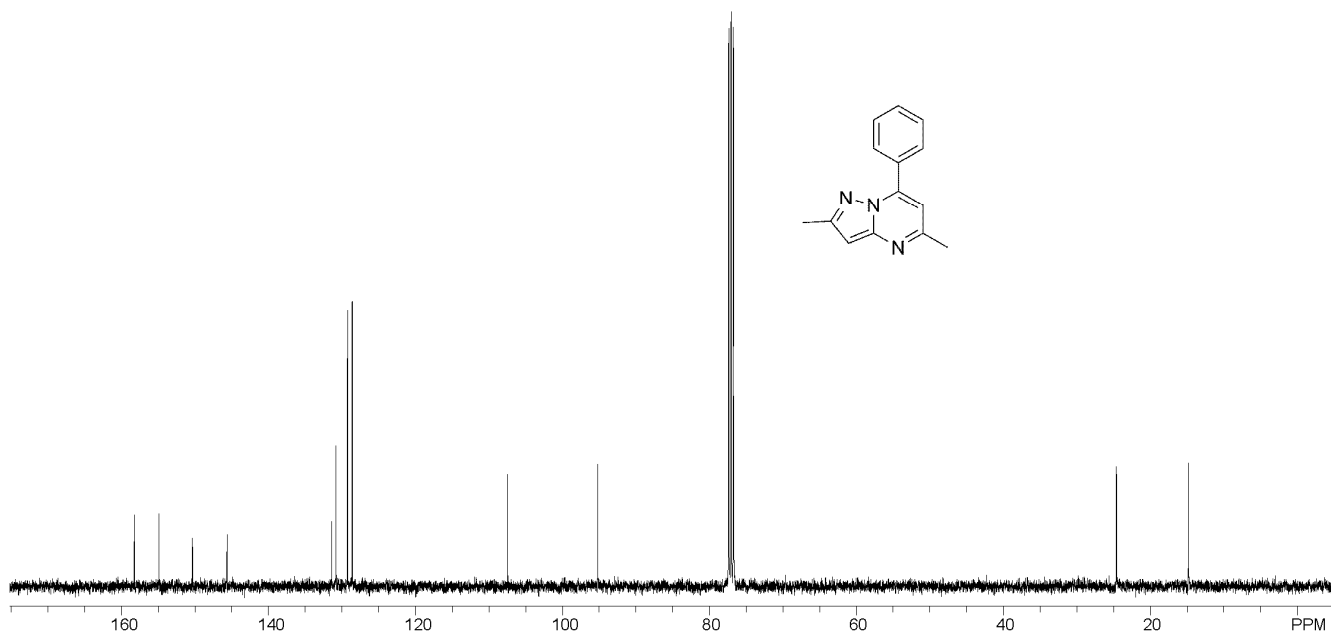

7.782  
7.762  
7.749  
7.745  
7.480  
7.478  
7.462  
7.448  
7.444  
7.282  
7.264  
7.244  
7.226  
7.203  
7.180  
6.638  
6.395

2.565  
2.435

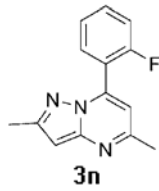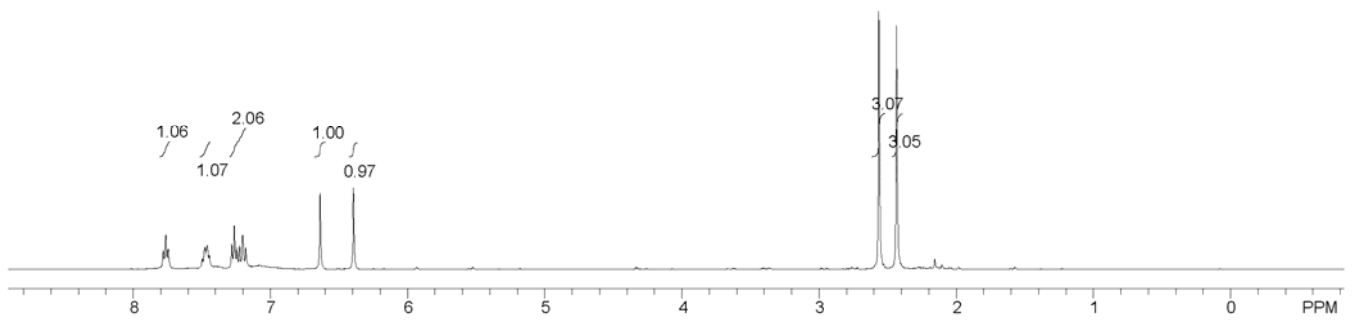

161.213  
158.704  
157.918  
154.863  
149.917  
140.571  
132.439  
132.352  
131.166  
131.145  
124.300  
124.264  
119.522  
119.376  
116.488  
116.278  
109.331  
109.310

95.417

77.510  
77.190  
76.870

24.661

14.834

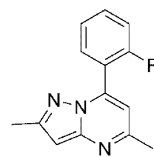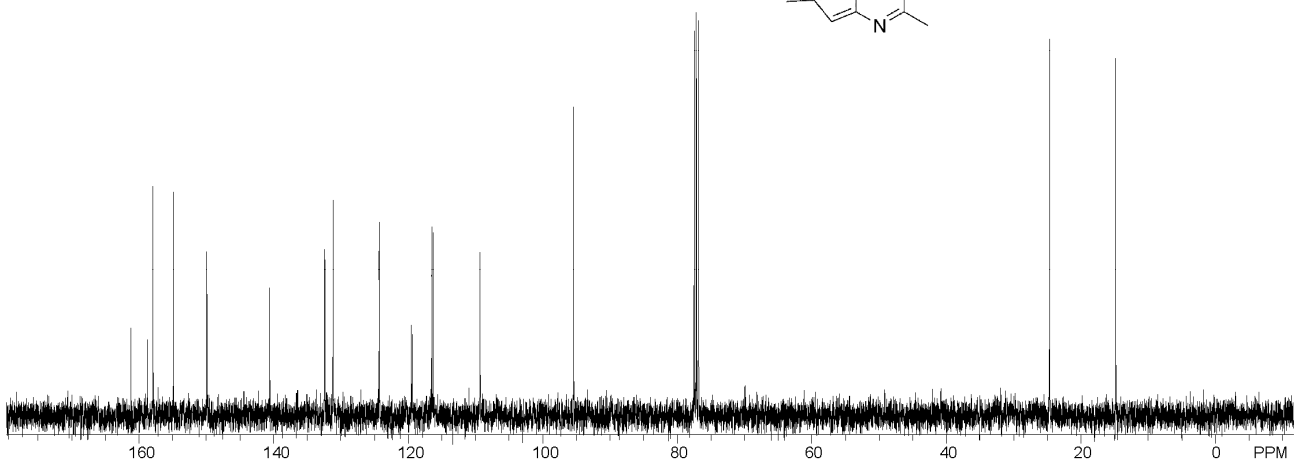

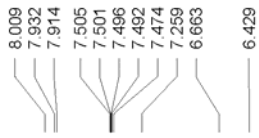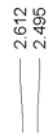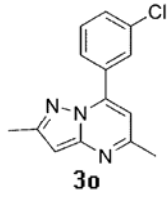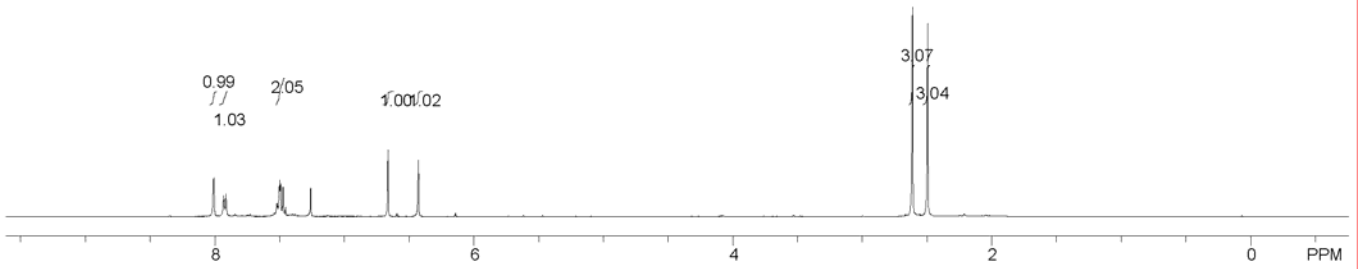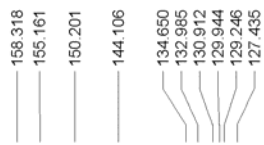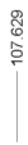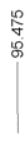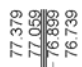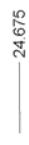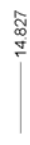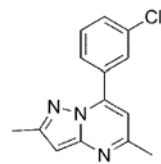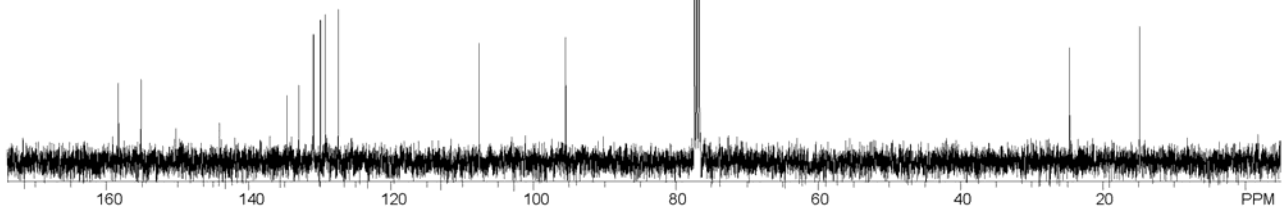

7.846  
7.824  
7.582  
7.561

6.557  
6.351

2.520  
2.422

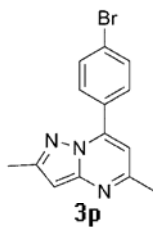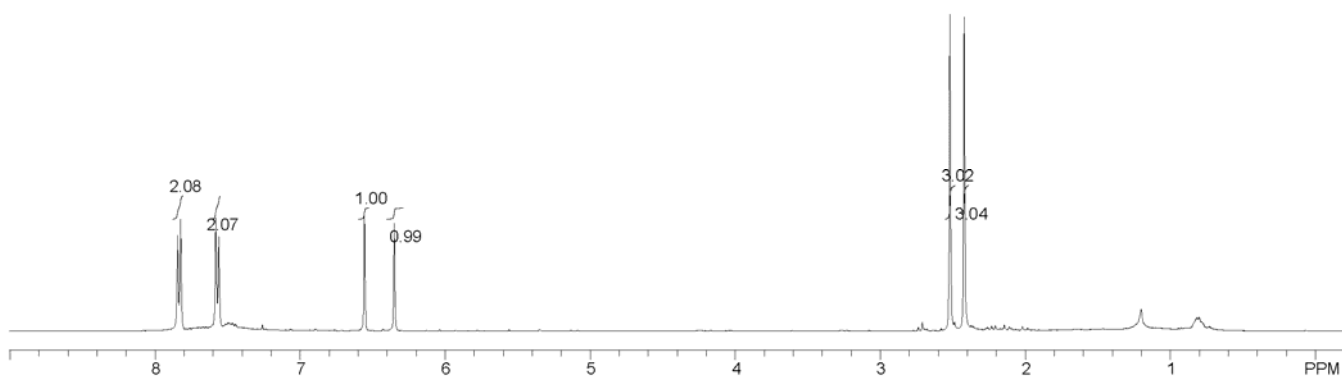

158.209  
154.871  
150.230  
144.222

131.792  
130.752  
130.068  
125.289

107.222

95.361

77.583  
77.270  
76.950

24.675

14.820

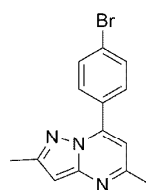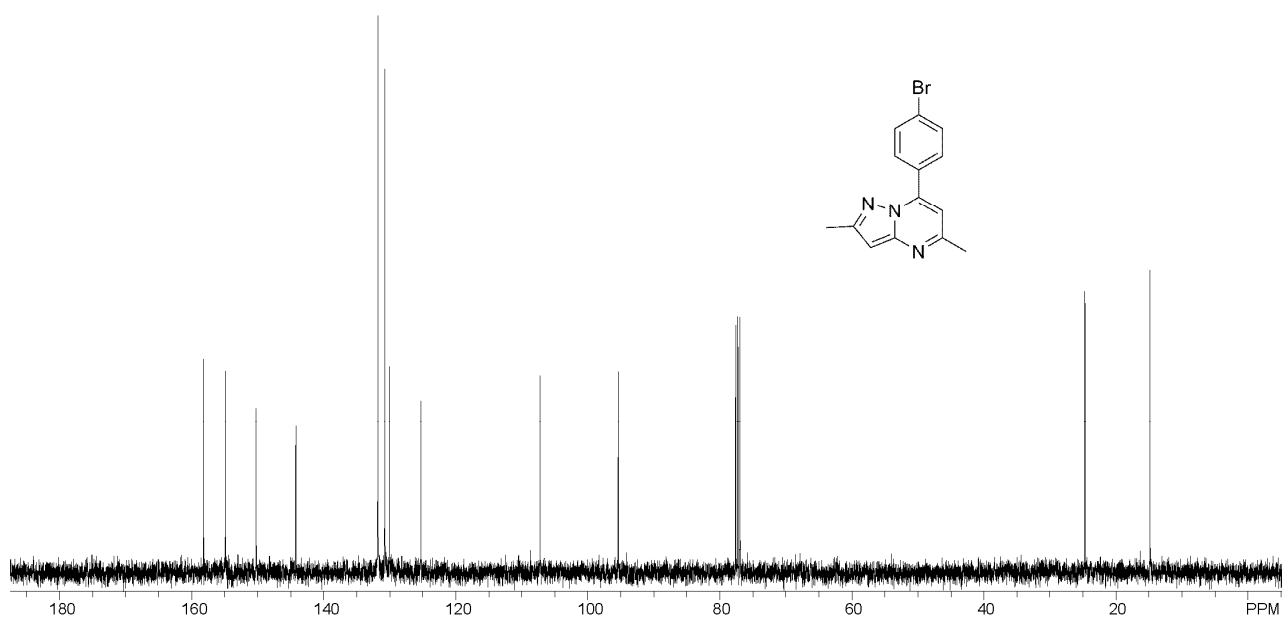

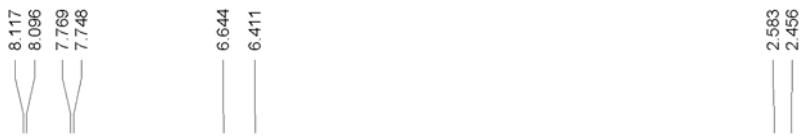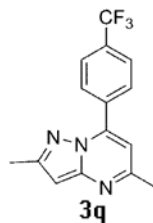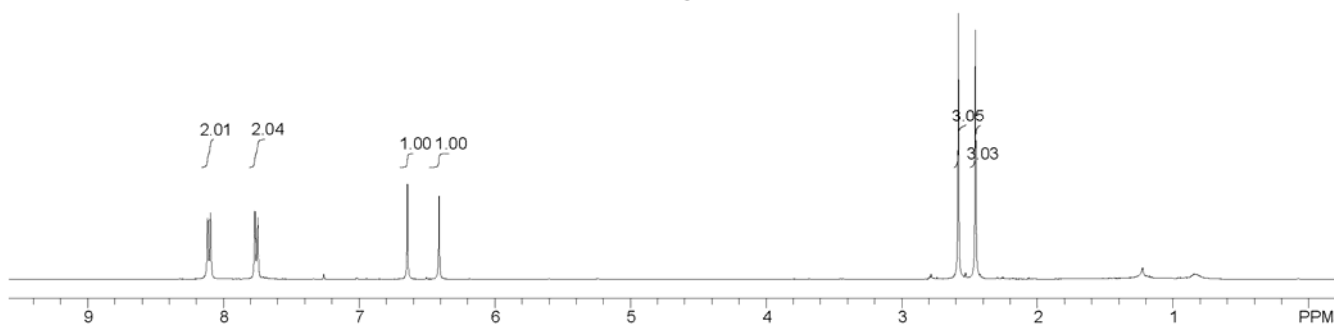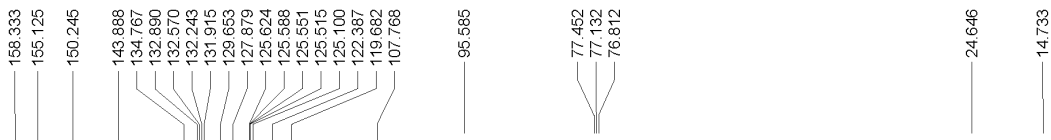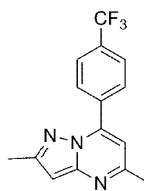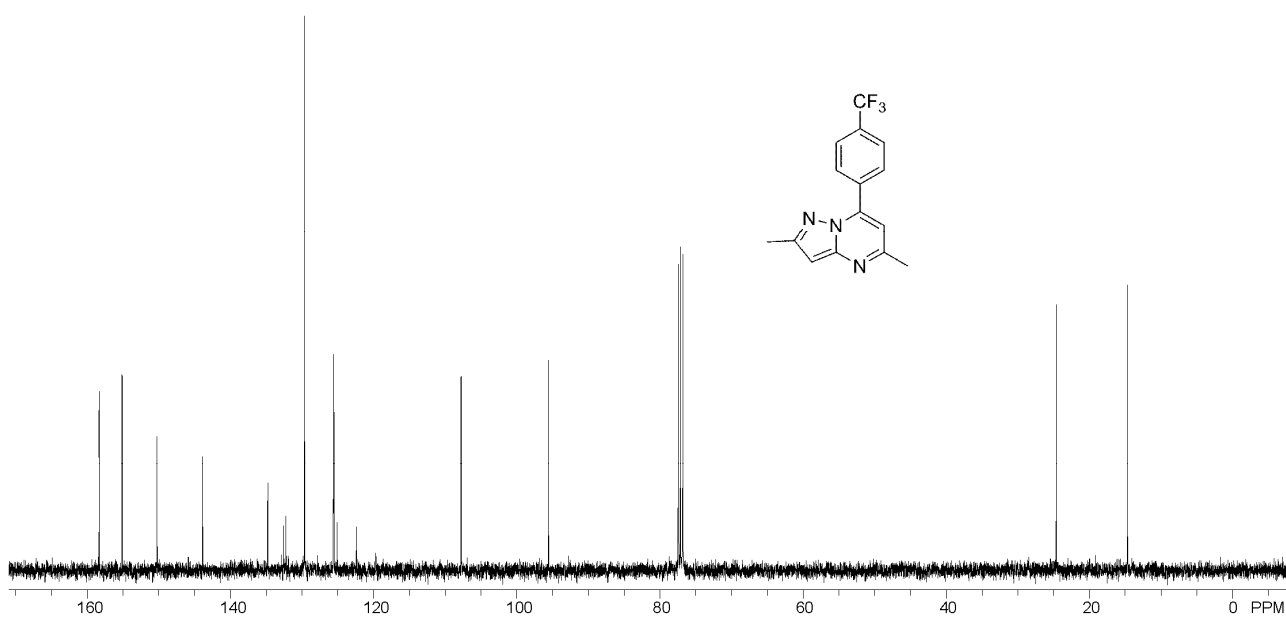

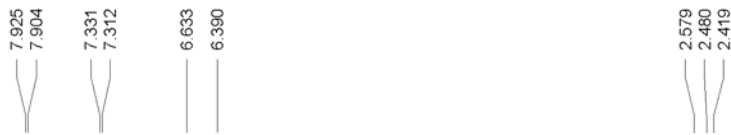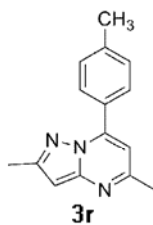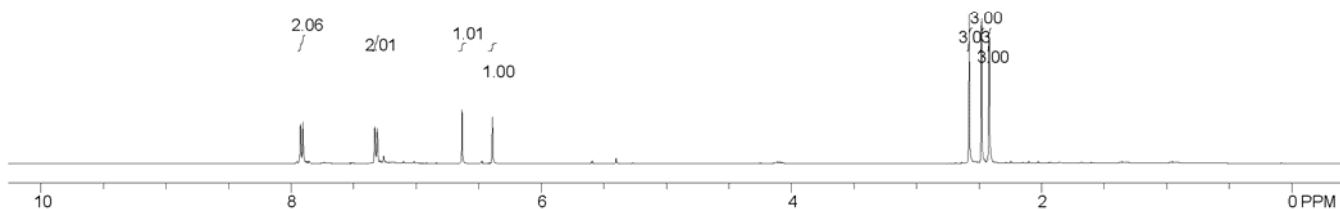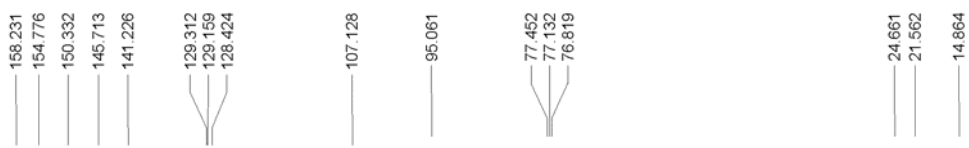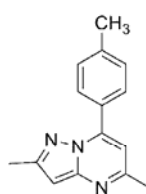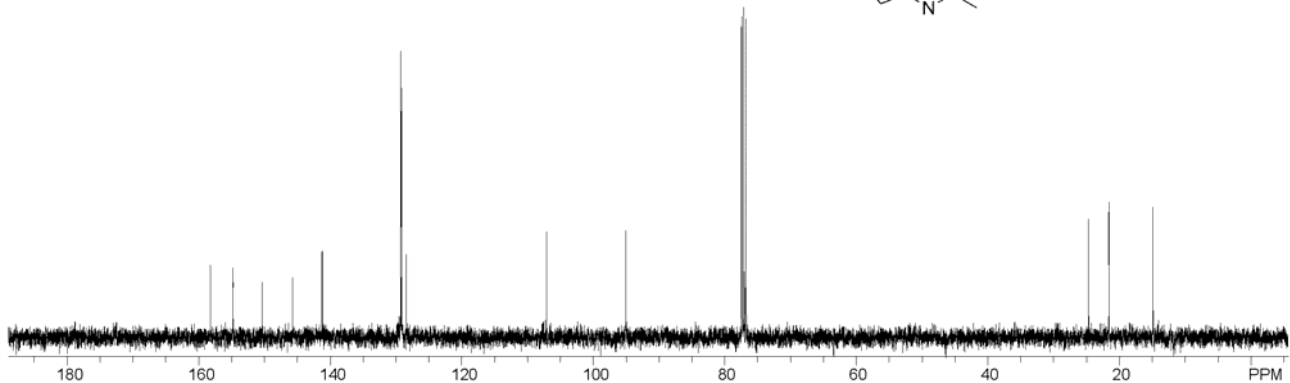

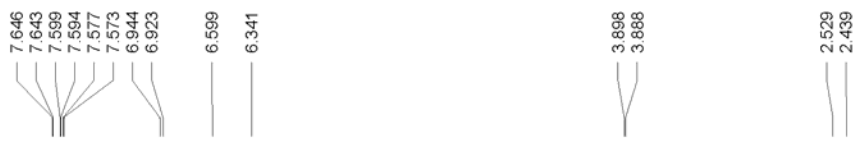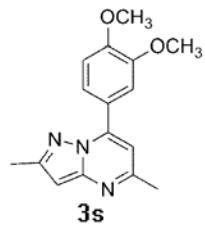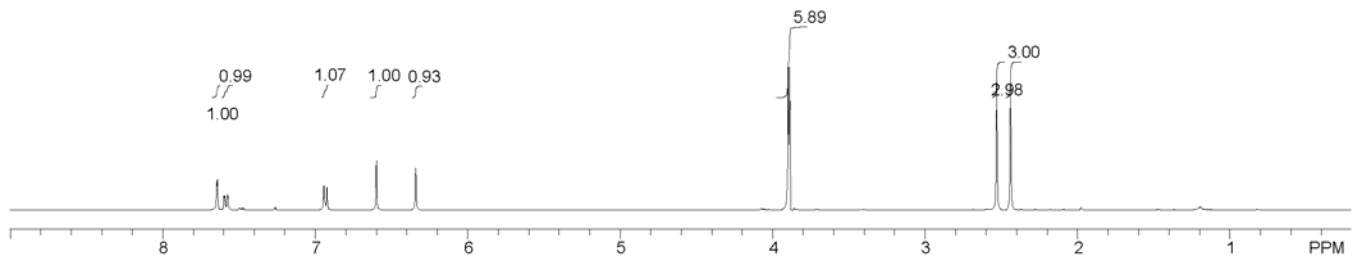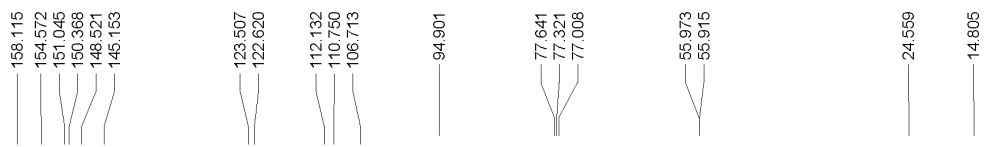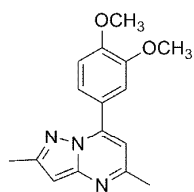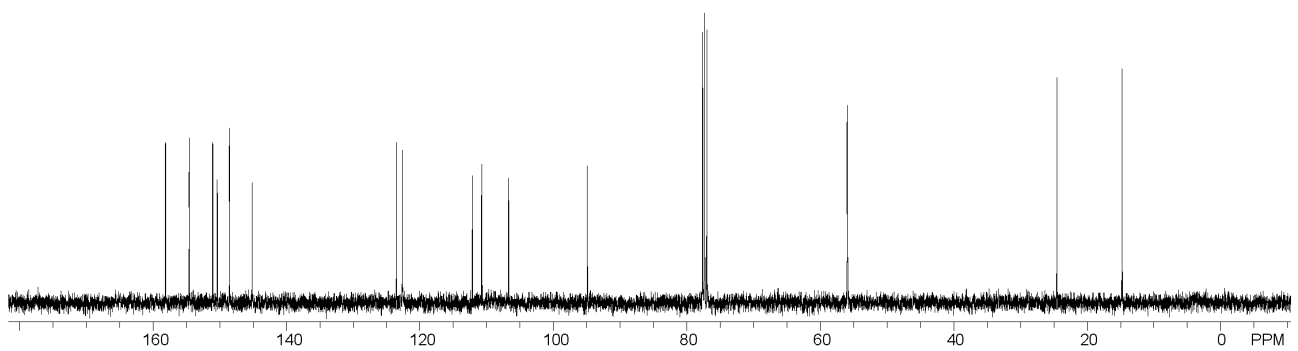



7.966  
7.946  
7.879  
7.858  
7.646  
7.630  
7.549  
7.529  
7.511  
7.470  
7.453  
7.437  
7.419  
7.370  
7.353  
6.600  
6.483

2.587  
2.373

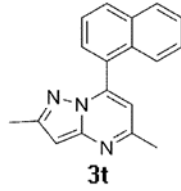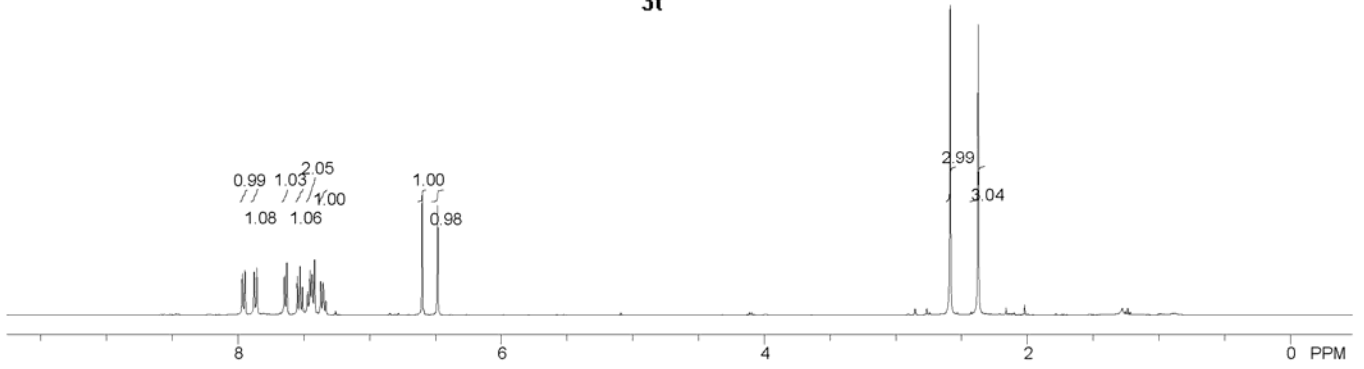

158.136  
155.074  
150.019  
145.335  
130.839  
133.596  
130.701  
129.443  
128.621  
127.850  
126.882  
126.439  
125.282  
125.280  
109.870

95.381

77.685  
77.364  
77.044

24.741

14.929

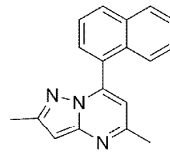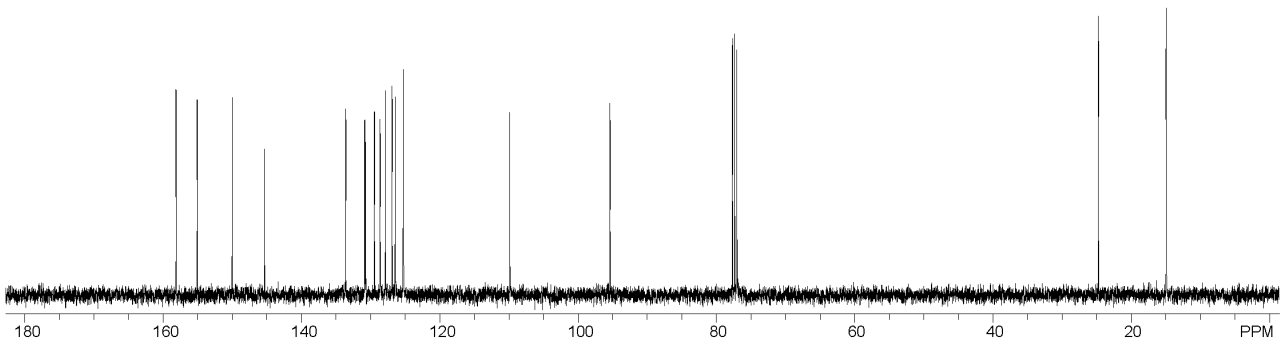

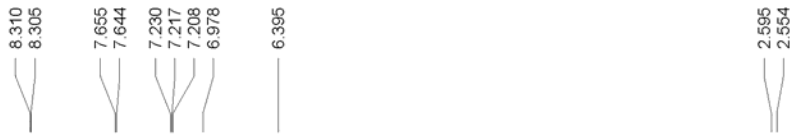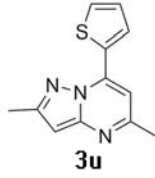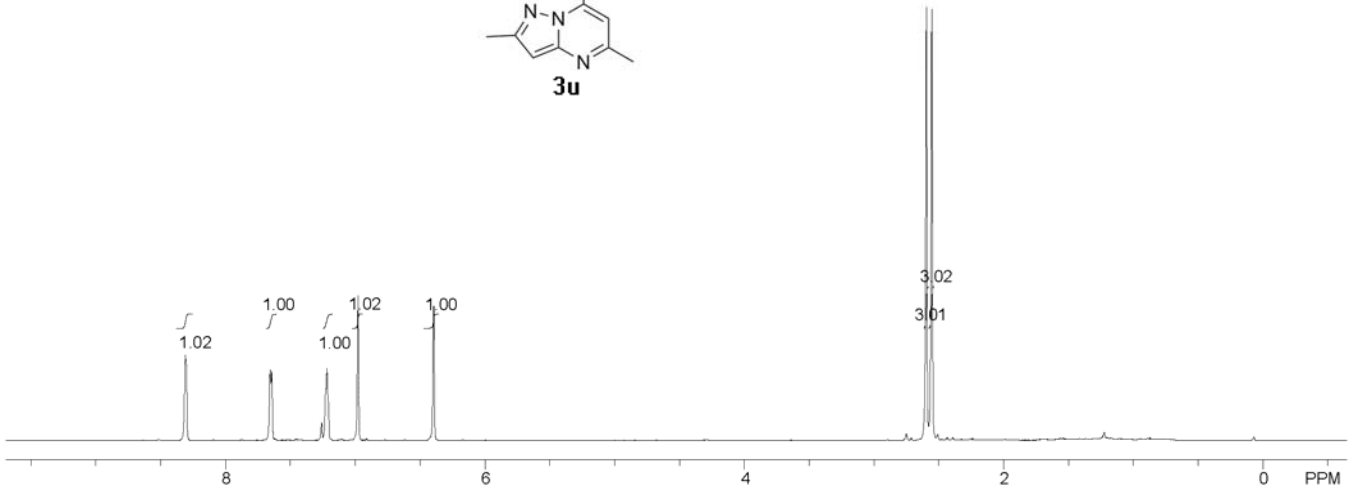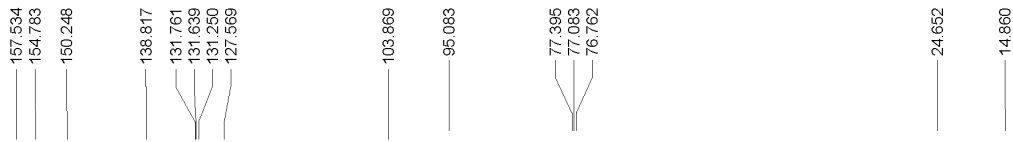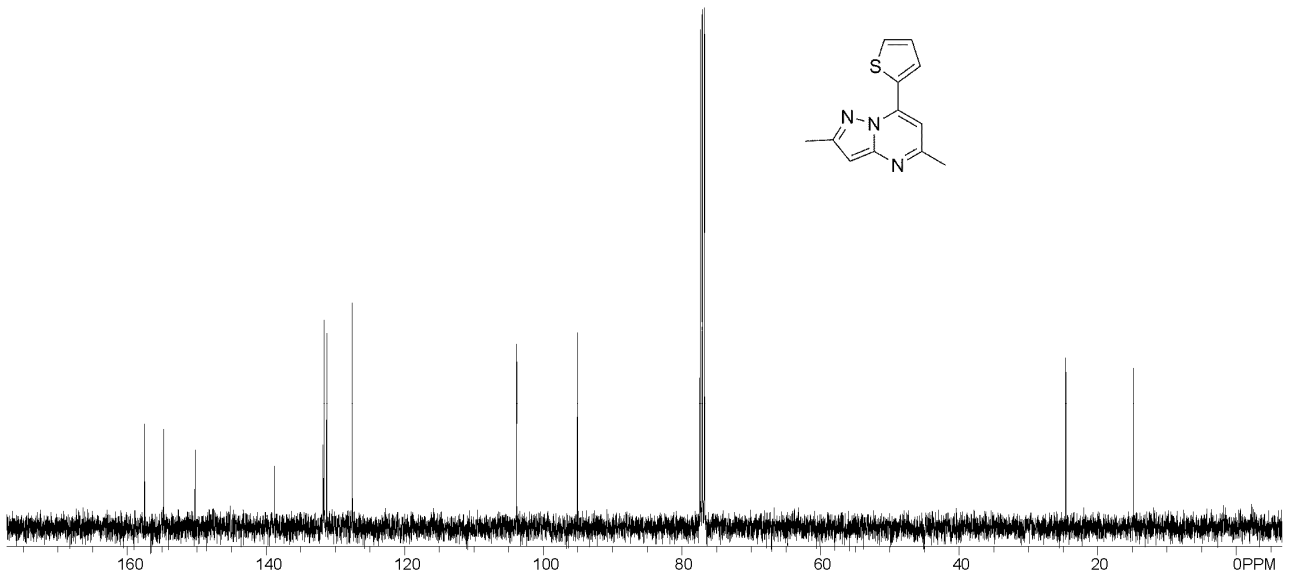

7.296  
7.277  
7.260  
7.242  
7.217

6.323  
6.027

4.355

2.468  
2.370

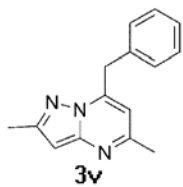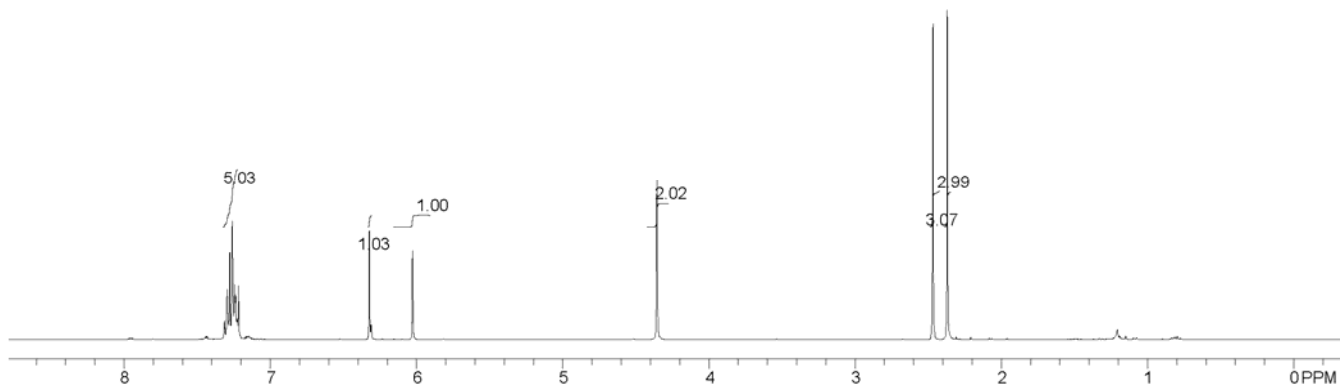

158.098  
154.386  
148.250  
147.627

134.878  
129.833  
128.827  
127.341

106.658

95.227

77.585  
77.273  
76.953

36.099

24.622

14.692

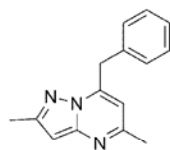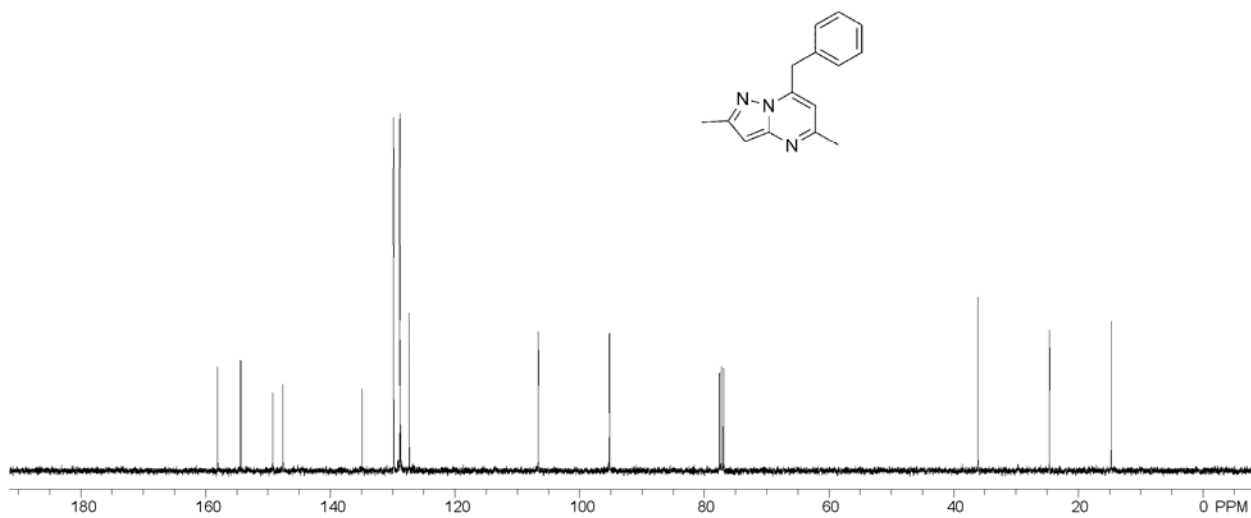

7.215  
7.198  
7.147  
7.136  
7.127  
6.308  
6.260

3.324  
3.305  
3.285  
3.096  
3.076  
3.057  
2.458  
2.423

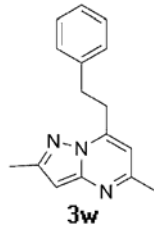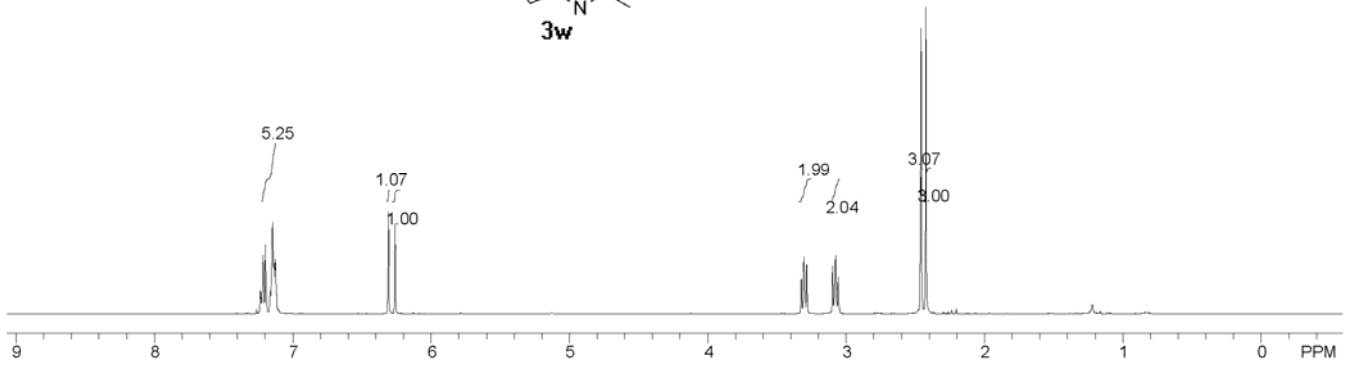

157.907  
154.341  
149.326  
147.269  
140.174

128.491  
128.370  
126.373

106.331

95.014

77.631  
77.311  
76.999

31.983  
31.747

24.553

14.715

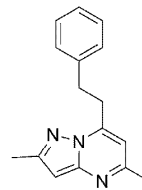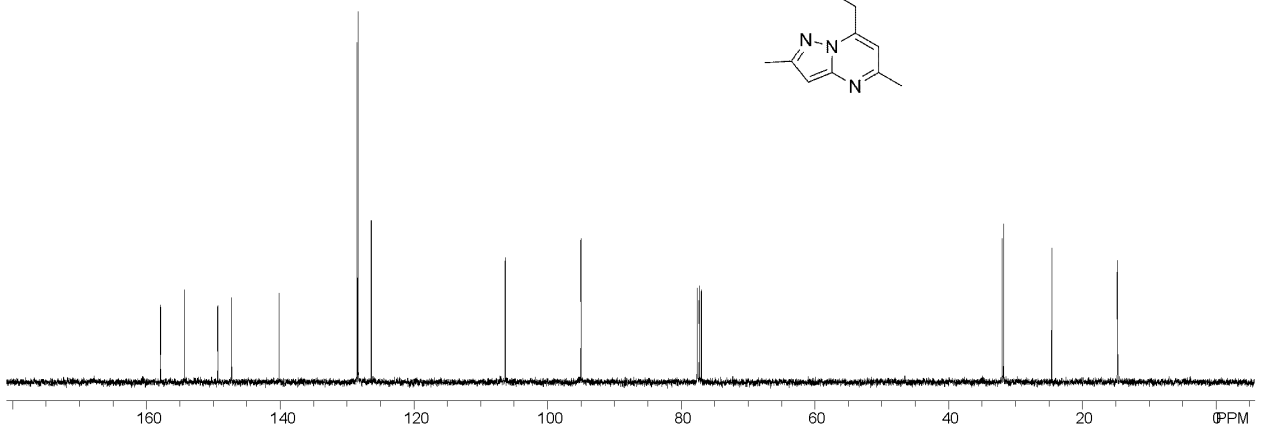

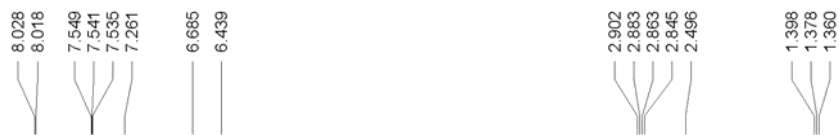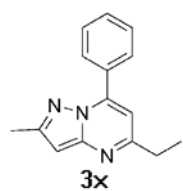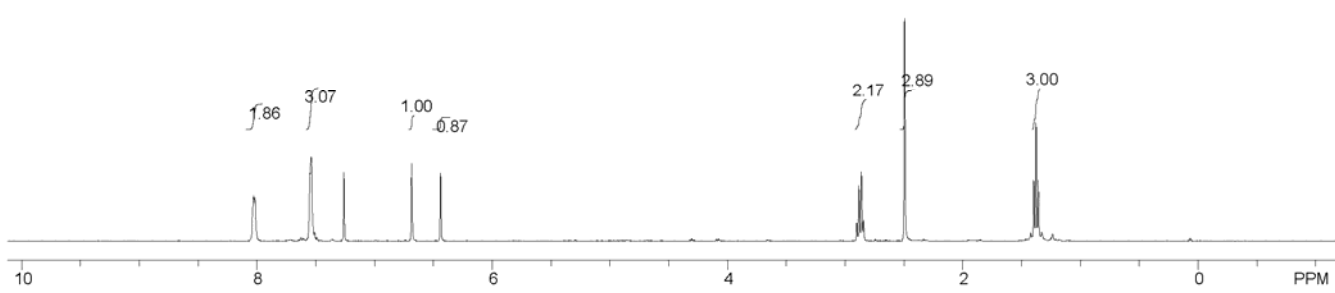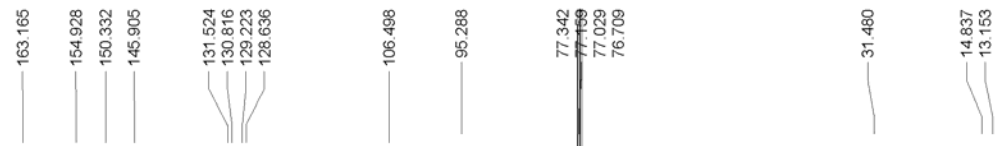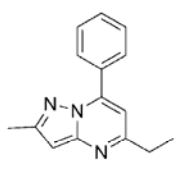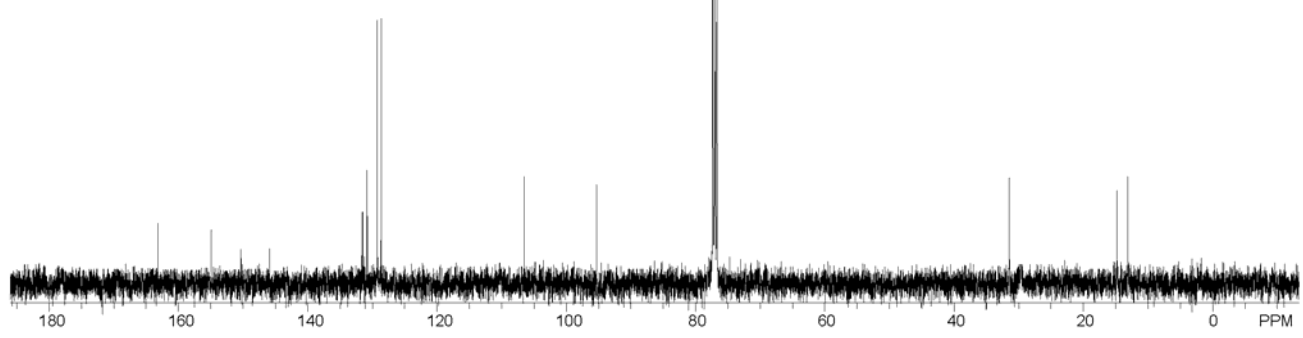

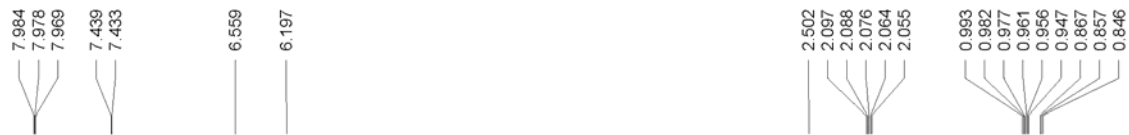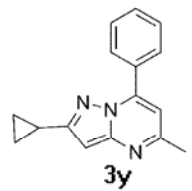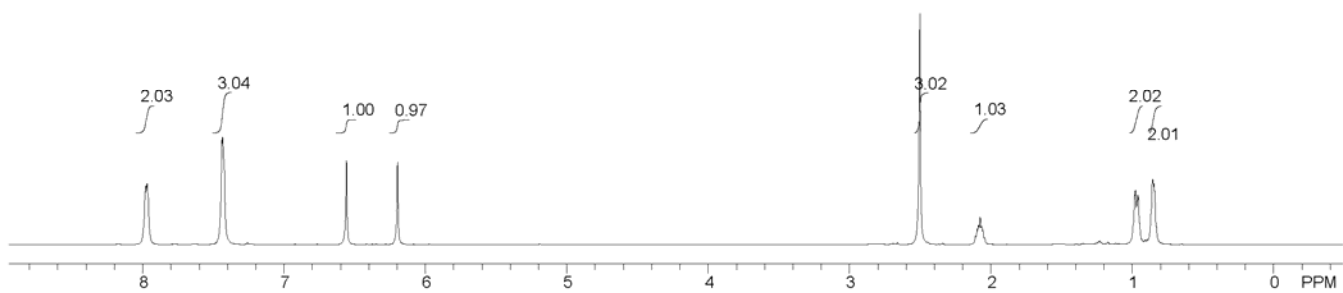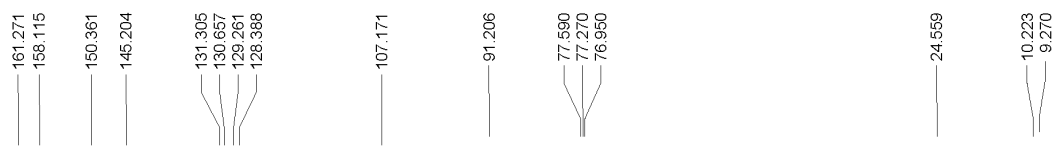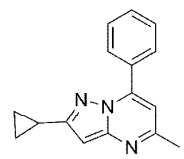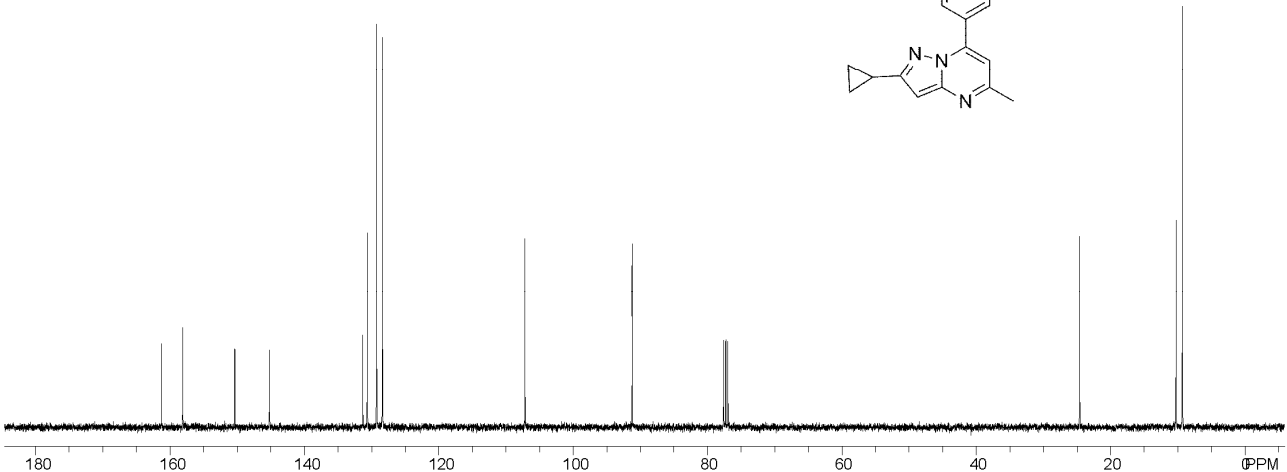

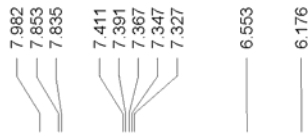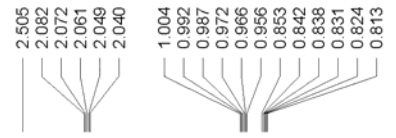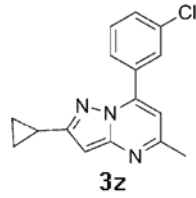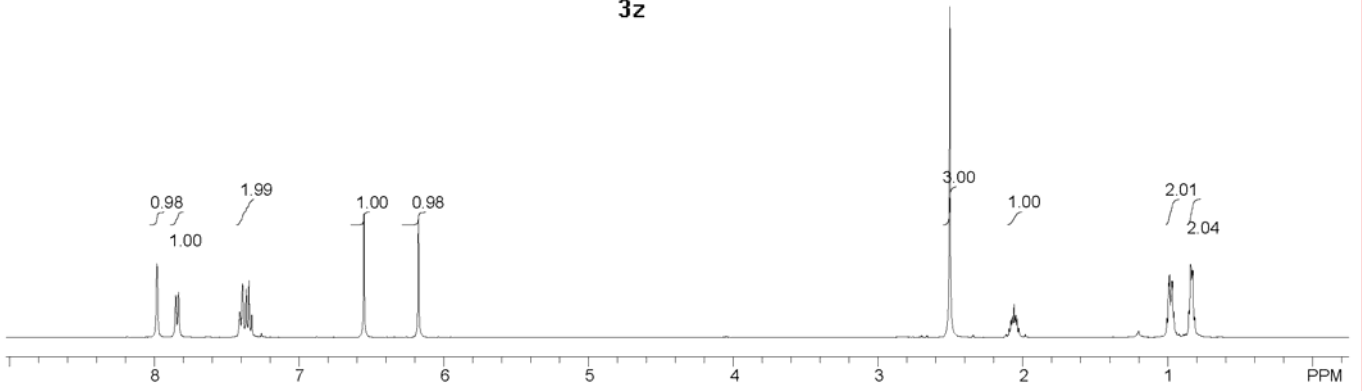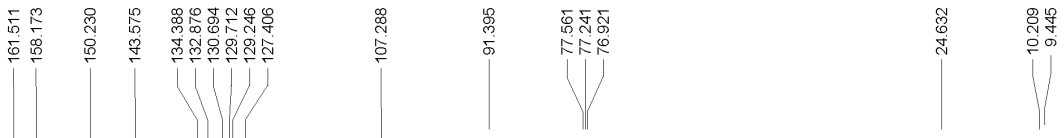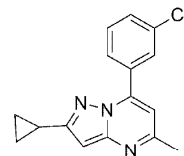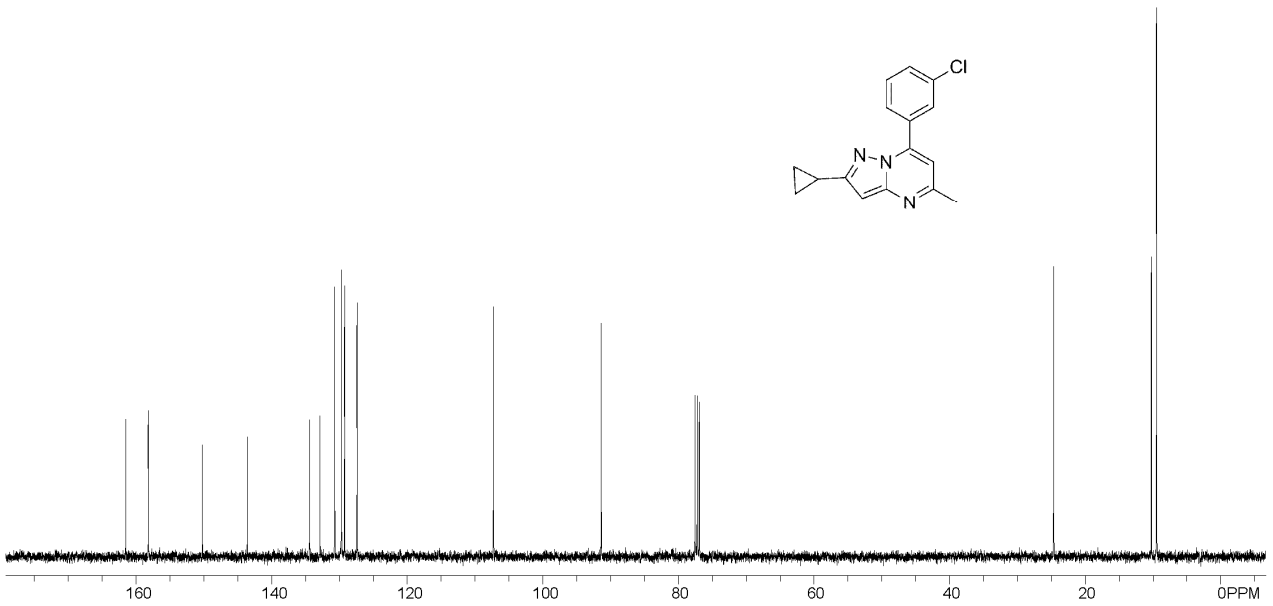

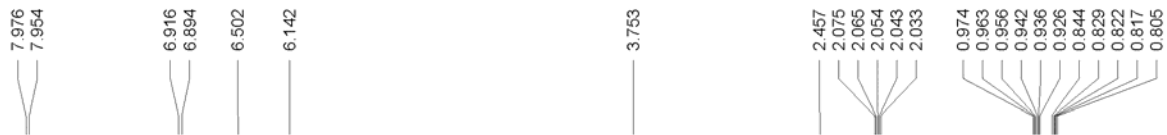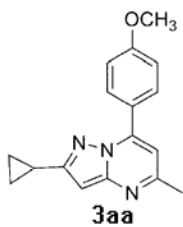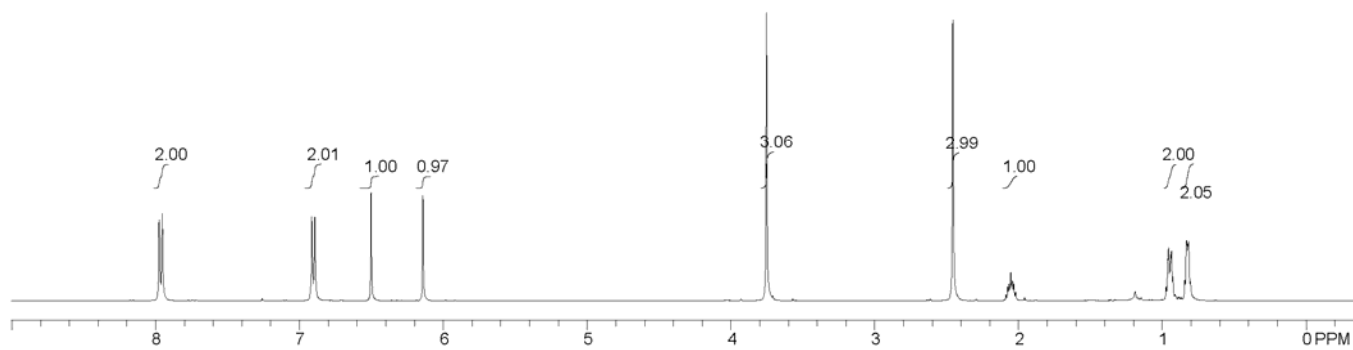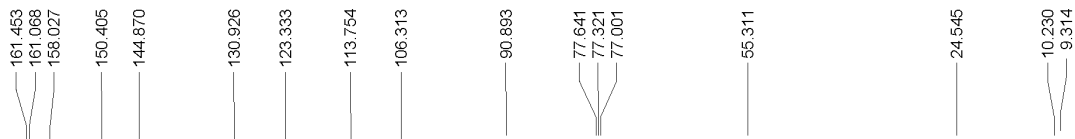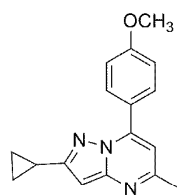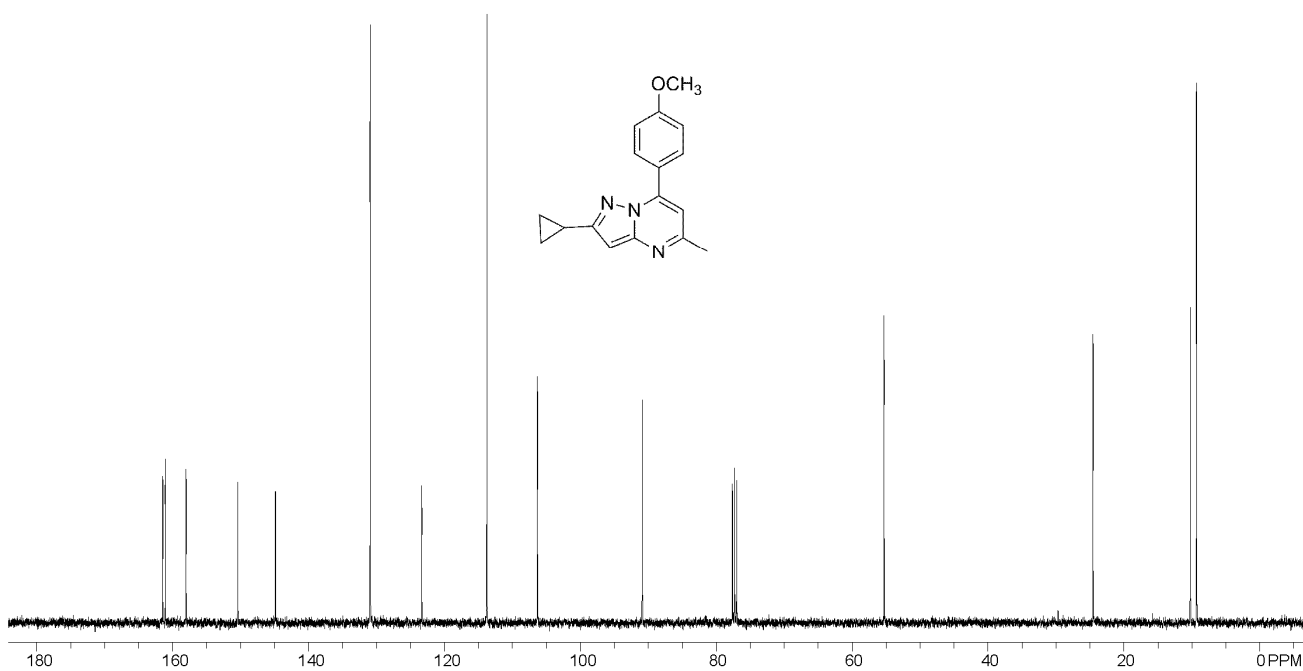



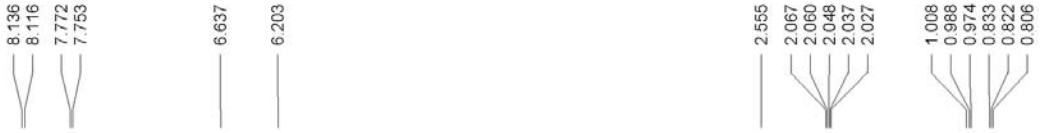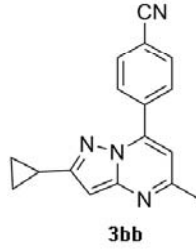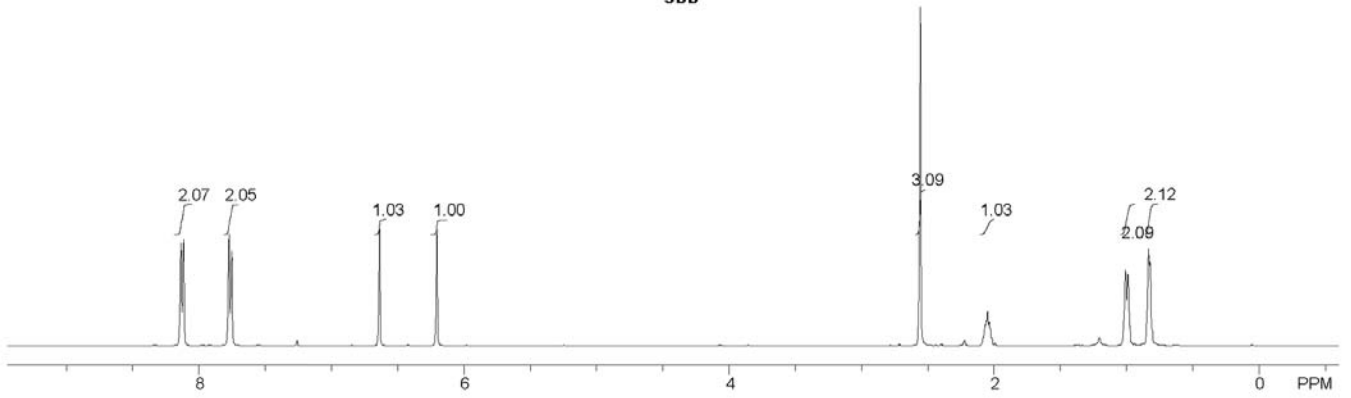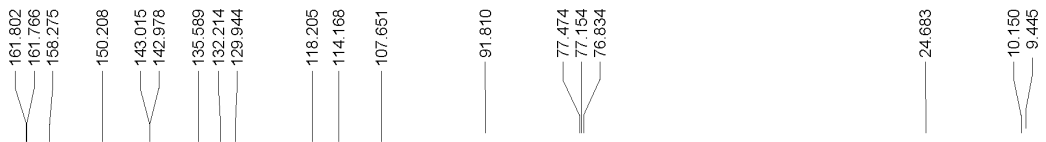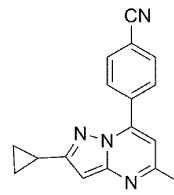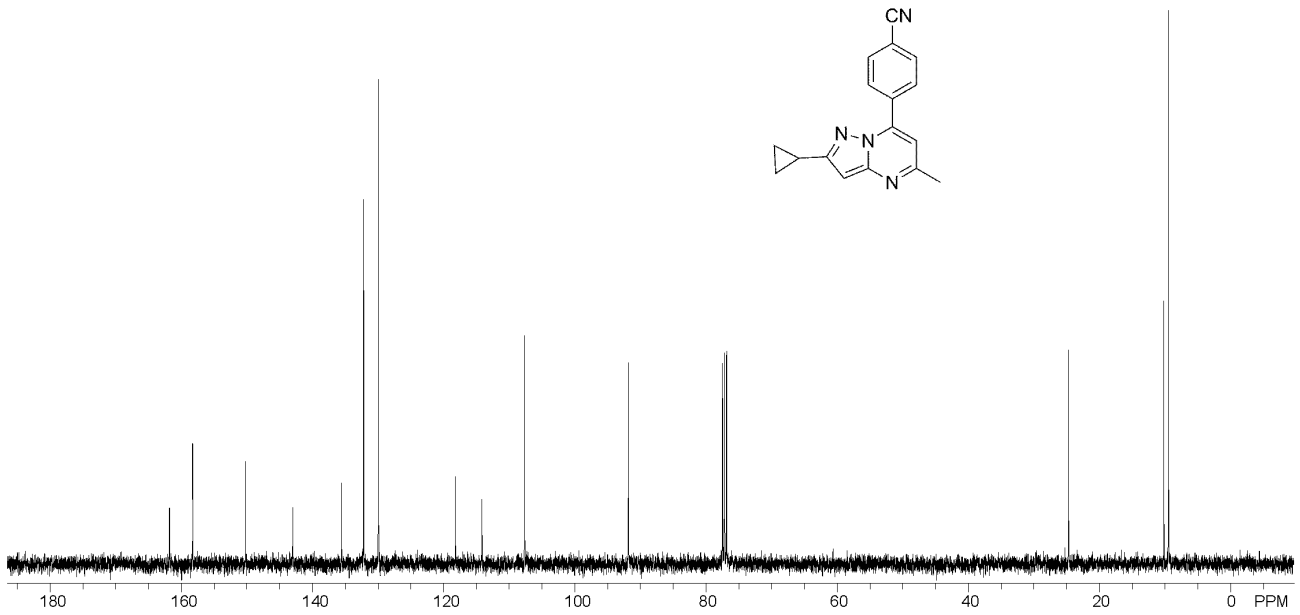

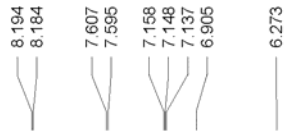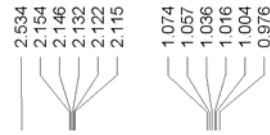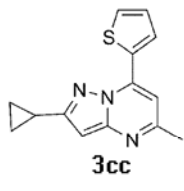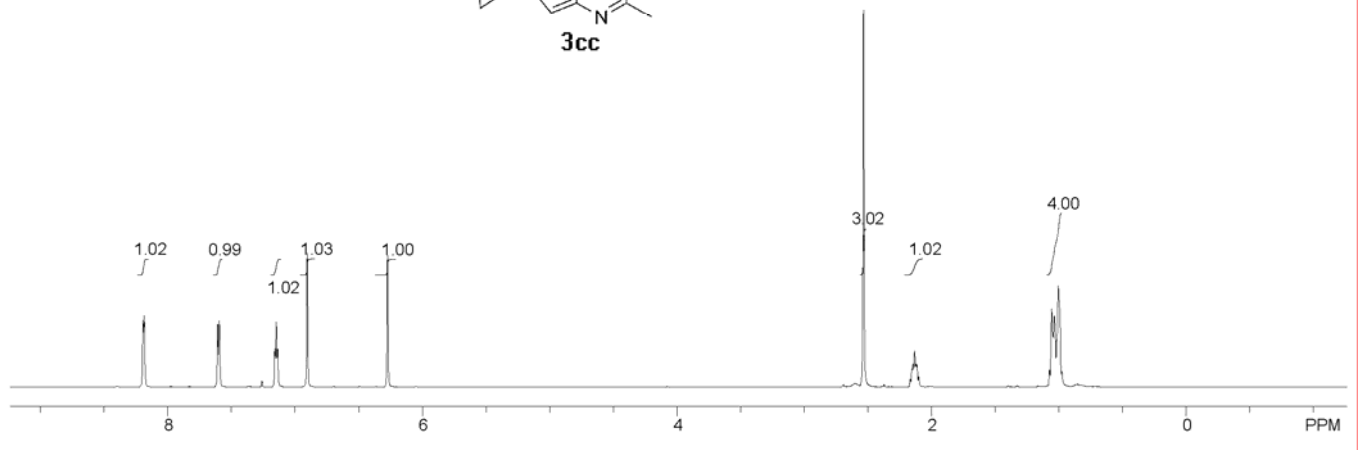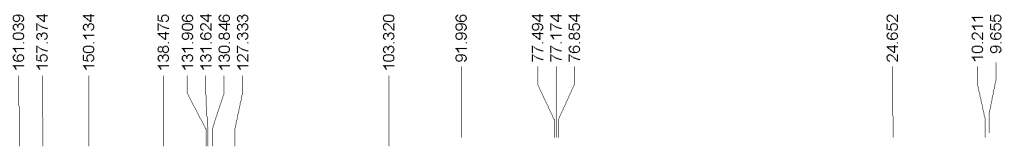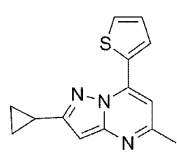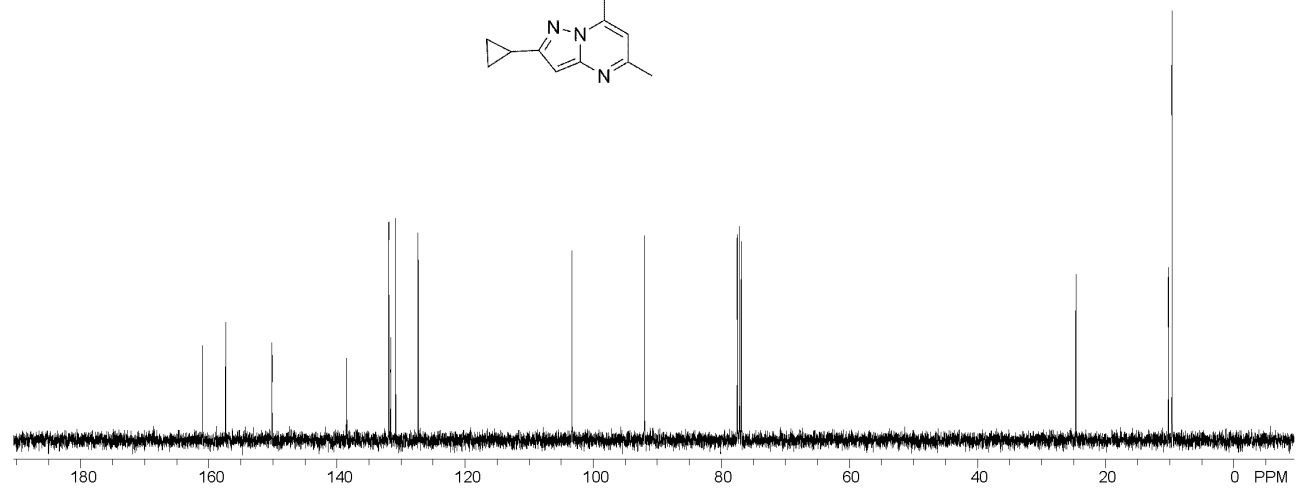

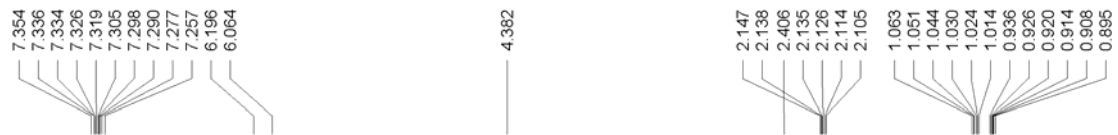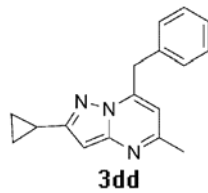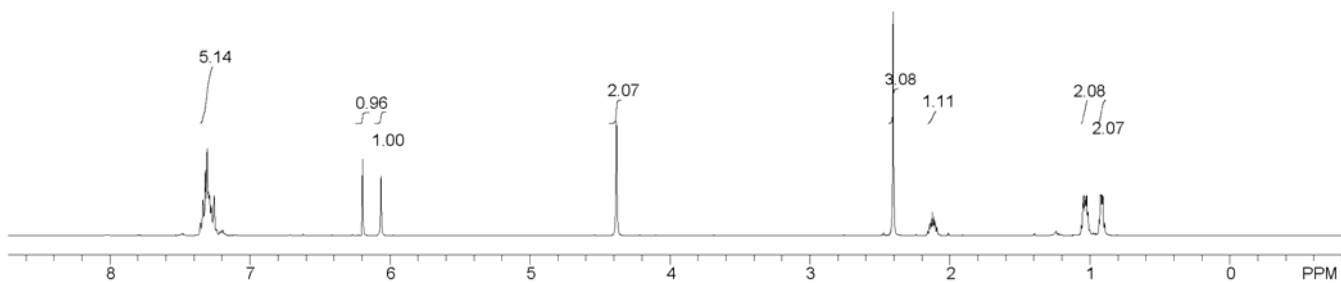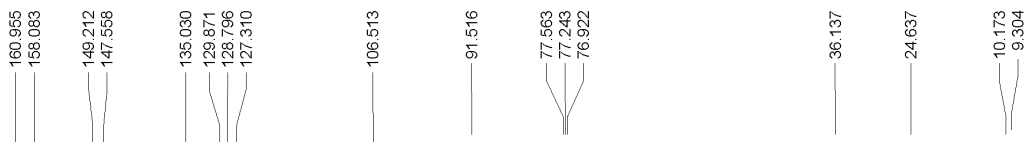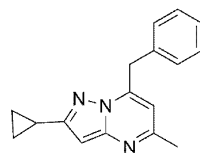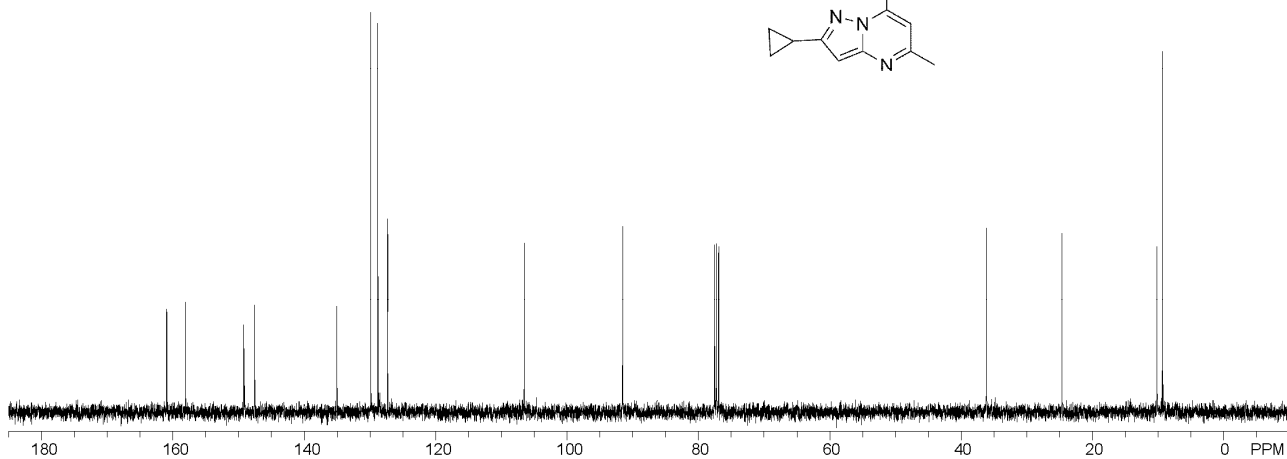

7.270  
7.250  
7.233  
7.182  
7.165

6.279  
6.180

3.333  
3.314  
3.294  
3.117  
3.096  
3.078

2.443  
2.120  
2.110  
2.088  
2.089

1.026  
1.005  
0.911  
0.904  
0.899

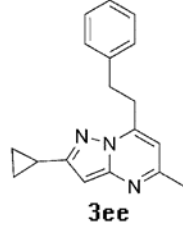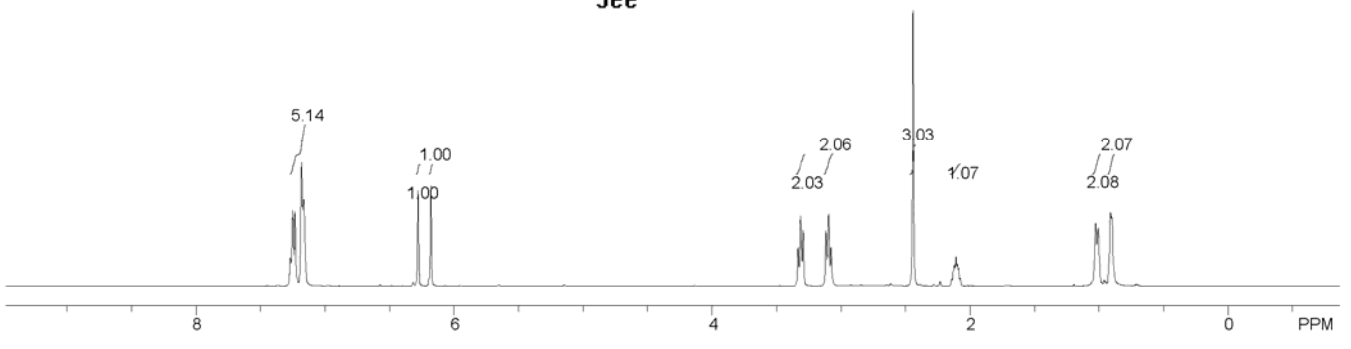

160.902  
157.892

149.296  
147.208

140.349

128.530  
128.352  
126.381

106.232

91.310

77.608  
77.288  
76.968

32.113  
31.816

24.584

10.188  
9.350

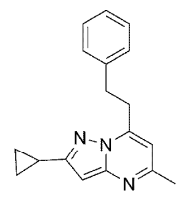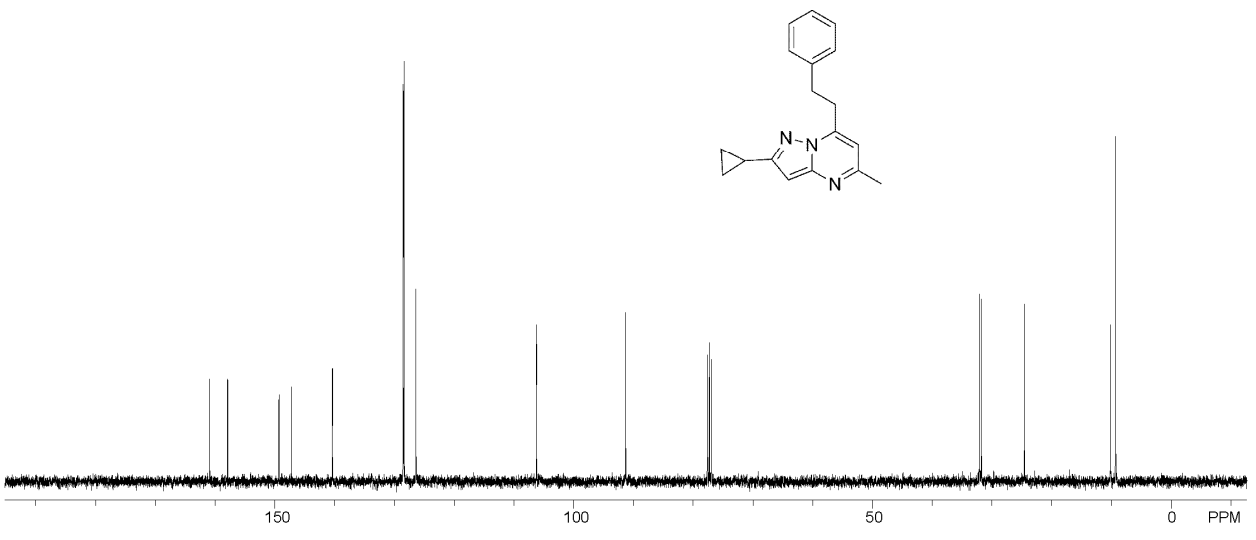

8.064  
8.056  
8.050  
8.047  
8.040  
7.545  
7.538  
7.529  
7.261

6.677

6.242

2.889  
2.870  
2.851  
2.832

2.148  
2.139  
2.127  
2.115  
2.106

1.387  
1.368  
1.349  
1.060  
1.048  
1.043  
1.032  
1.027  
1.021  
1.011  
0.899  
0.888  
0.883  
0.877  
0.871  
0.860

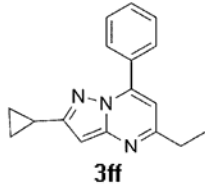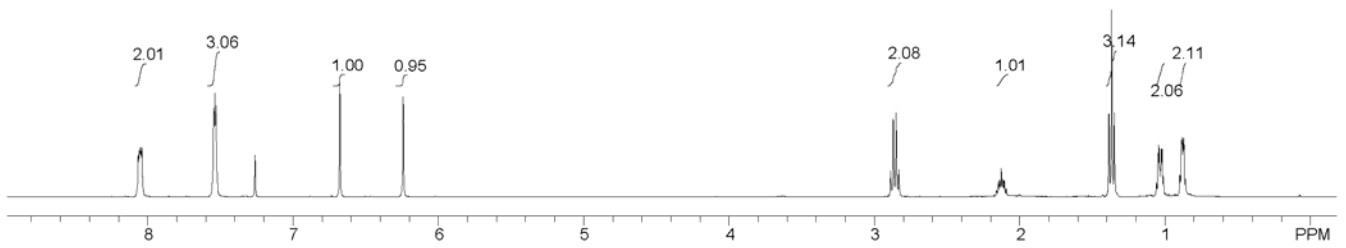

163.139  
161.581

150.282  
145.699

131.474  
130.781  
129.298  
128.539

106.286

91.072

77.365  
77.275  
77.052  
76.731

31.433

13.152  
10.243  
9.353

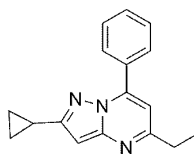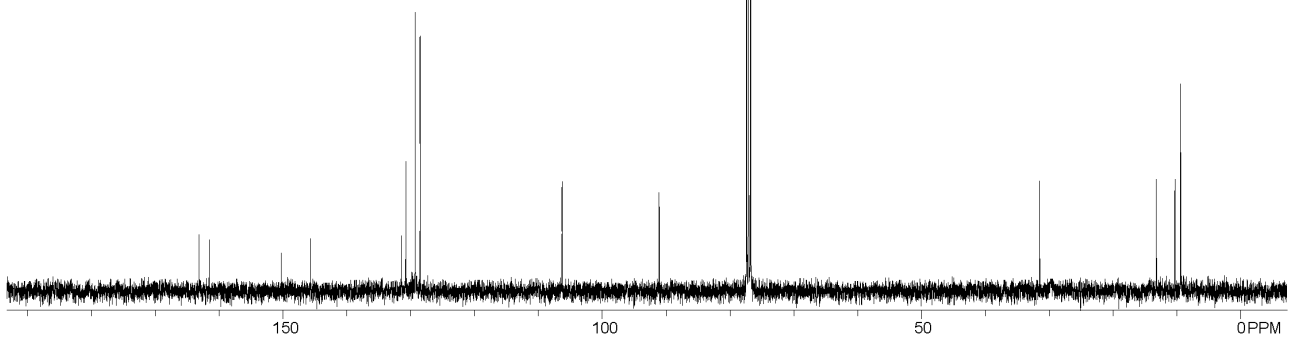

8.136  
8.132  
8.122  
8.113  
8.020  
8.017  
7.998  
7.558  
7.550  
7.542  
7.533  
7.457  
7.439  
7.419  
7.381  
7.363  
7.345  
6.940  
6.707

2.606

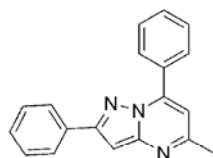

**3gg**

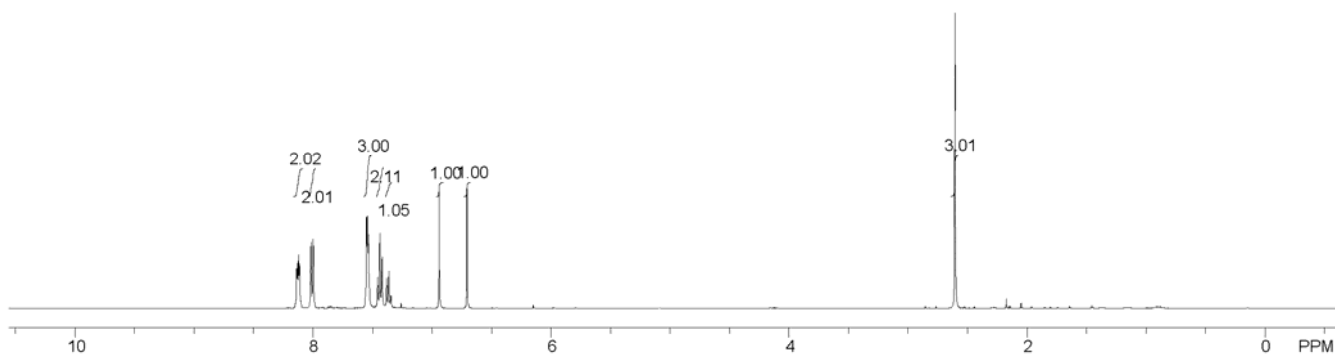

158.642  
155.617  
150.800  
145.611  
133.082  
131.078  
130.887  
129.447  
128.815  
128.662  
128.464  
126.559

108.147

92.502

77.496  
77.184  
76.864

24.768

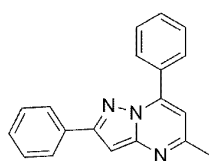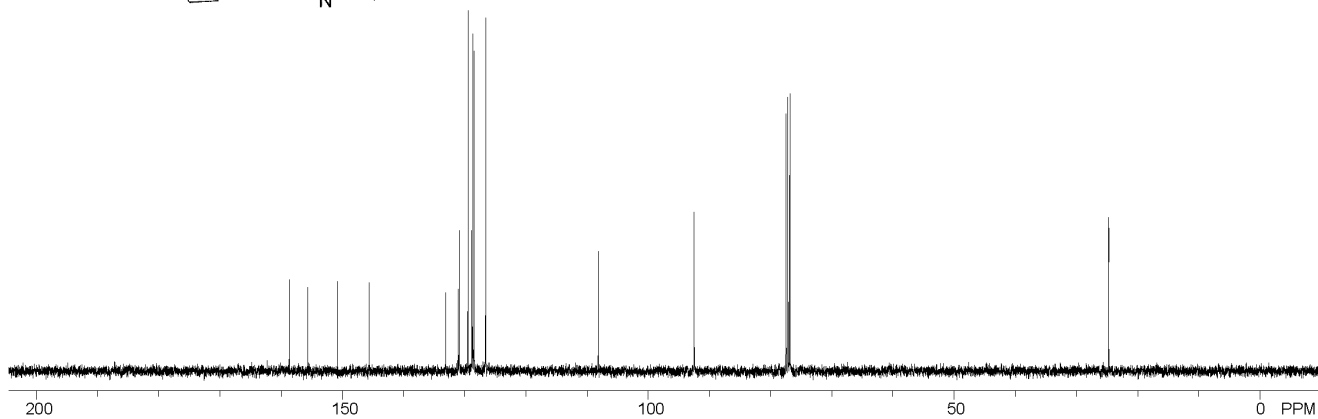

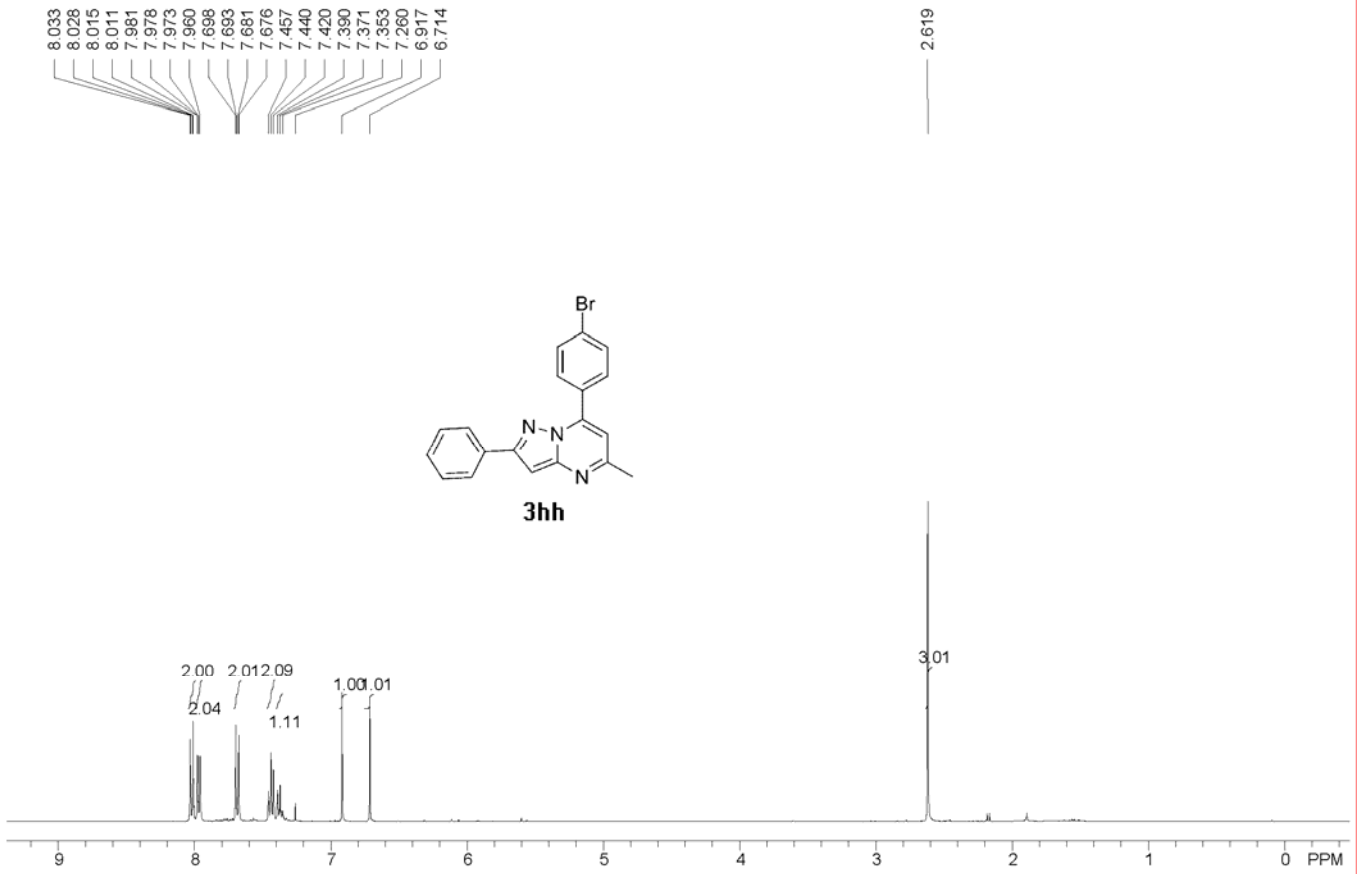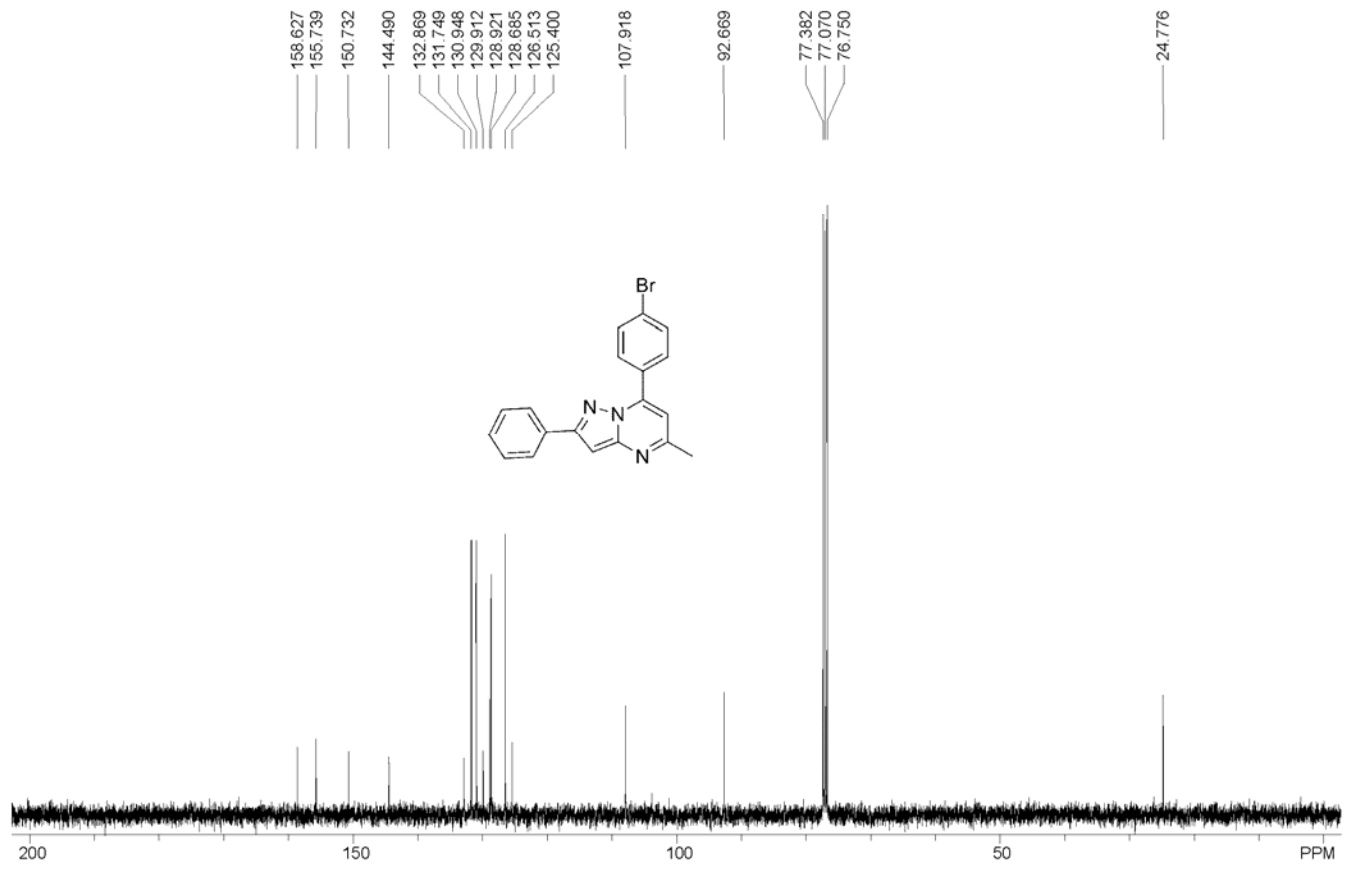

7.954  
7.949  
7.571  
7.553  
7.547  
7.529  
7.472  
7.468  
7.452  
6.584  
6.579

2.620  
2.138

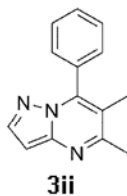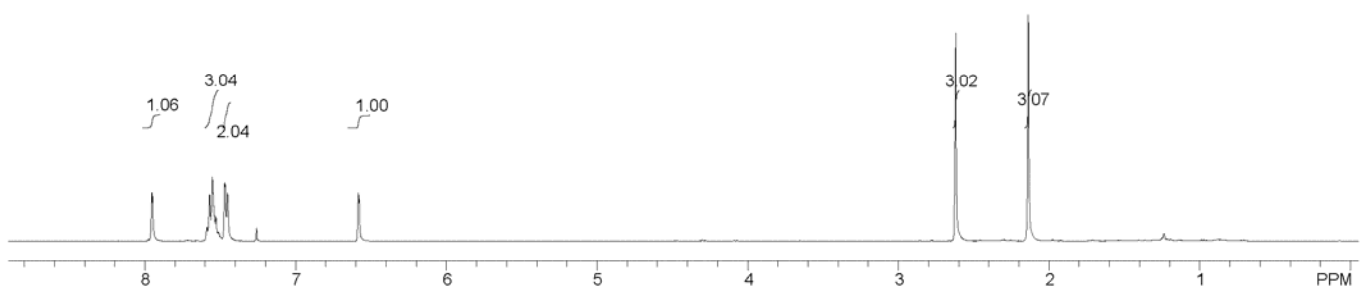

159.598  
147.364  
143.960  
130.846  
129.893  
129.406  
128.919  
114.939  
95.446  
77.401  
77.081  
76.768  
24.094  
15.089

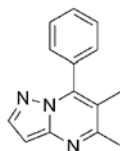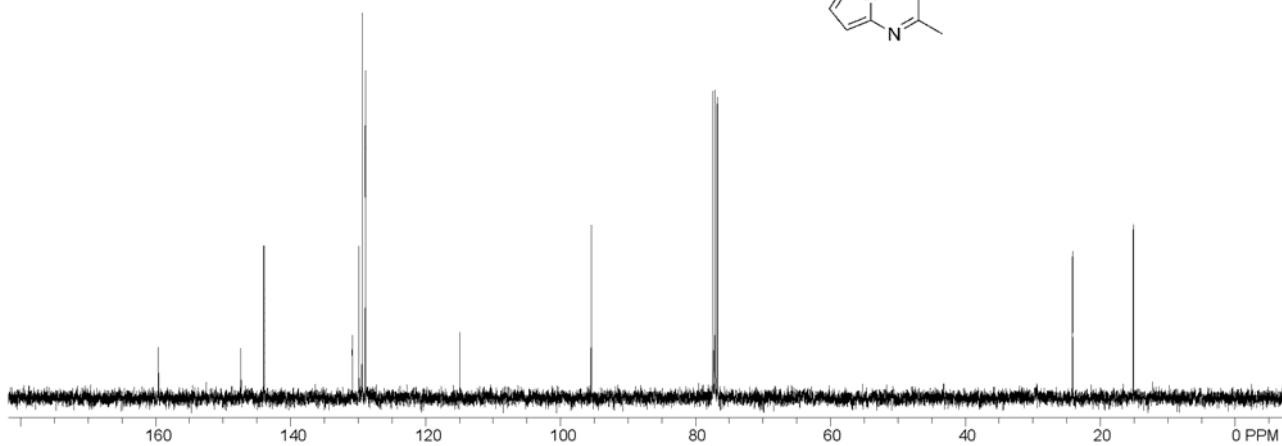



7.544  
7.525  
7.519  
7.502  
7.463  
7.459  
7.444

6.352

2.571

2.390

2.078

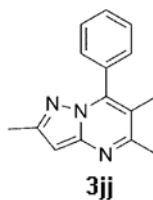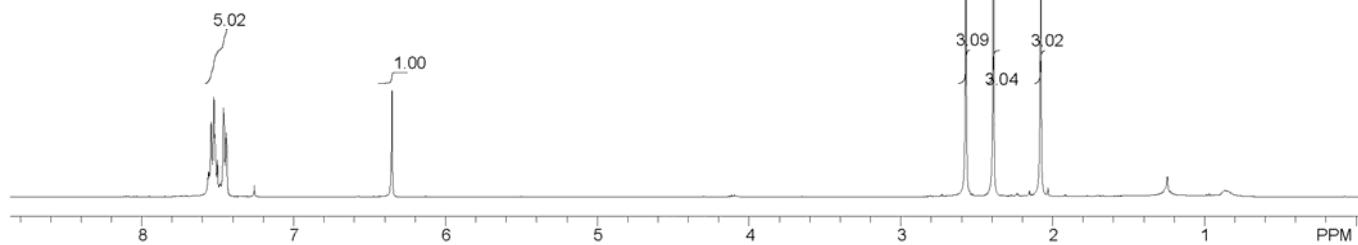

159.060

153.947

148.186

143.539

130.948

129.755

129.581

128.795

113.899

84.770

77.466

77.146

76.826

24.101

15.096

14.856

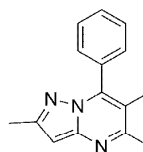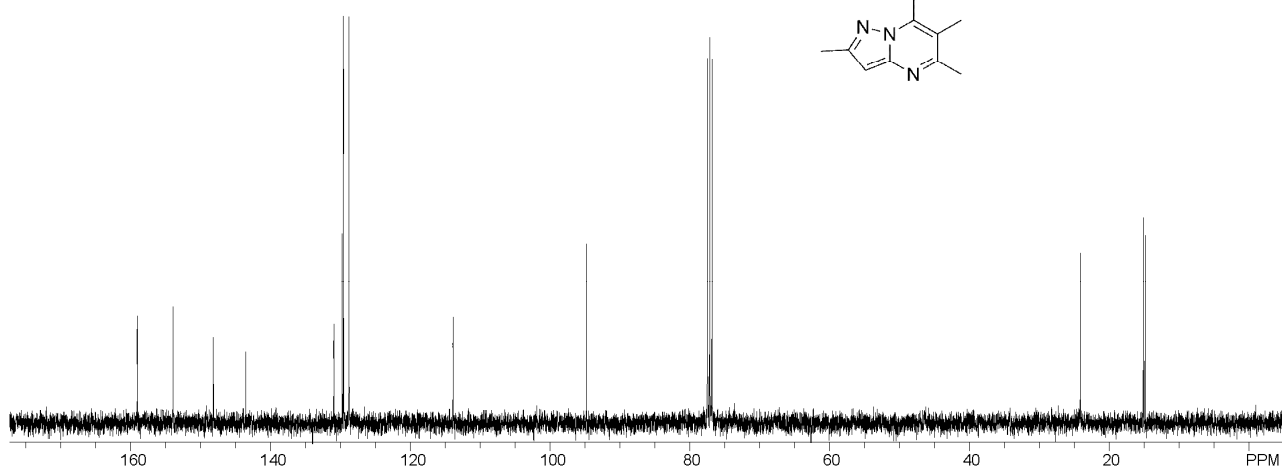

7.535  
7.531  
7.518  
7.513  
7.508  
7.503  
7.497  
7.466  
7.451  
7.446  
6.108

2.566  
2.551  
2.078  
2.075  
2.032  
2.028  
2.020  
2.016  
2.007  
0.959  
0.954  
0.948  
0.943  
0.938  
0.933  
0.927  
0.769  
0.763  
0.761  
0.757  
0.744

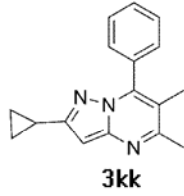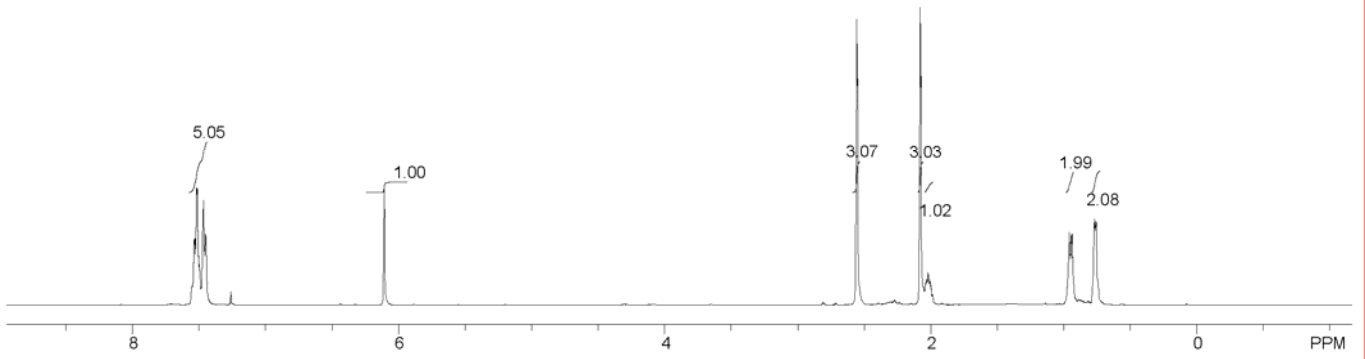

160.682  
159.038  
148.194  
143.415  
130.926  
129.704  
129.646  
128.642  
113.674  
89.998  
77.430  
77.110  
76.790  
24.035  
15.067  
10.223  
9.387

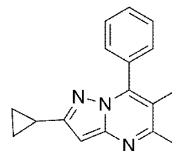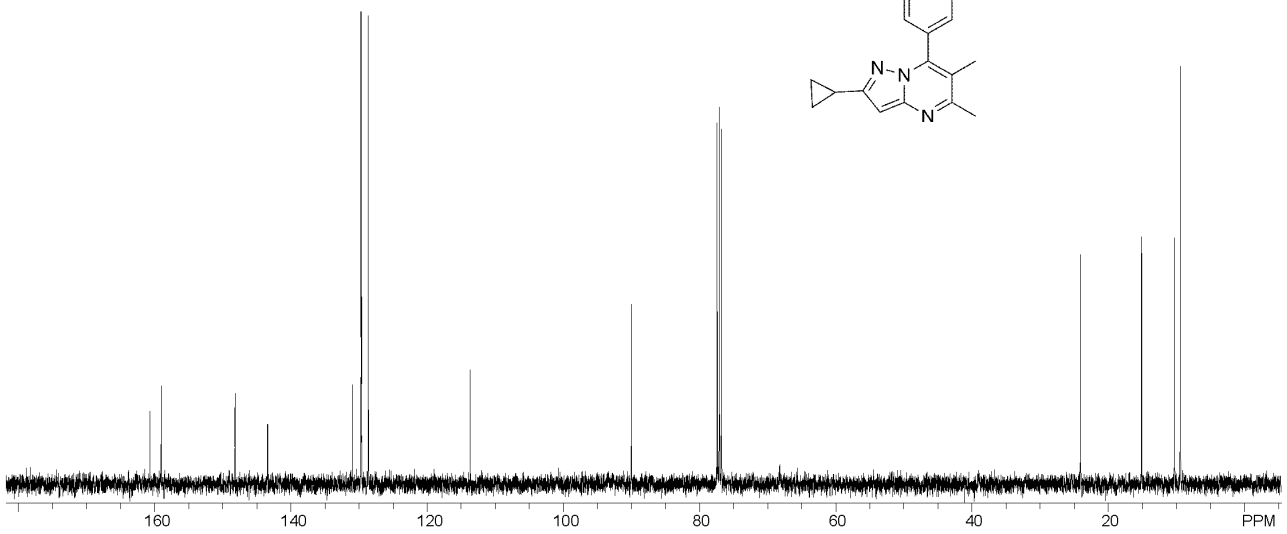

7.558  
7.540  
7.525  
7.431  
7.426  
7.412  
7.408  
7.259

6.357

2.643  
2.494  
2.474  
2.456  
2.438  
2.385

1.073  
1.054  
1.035

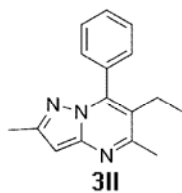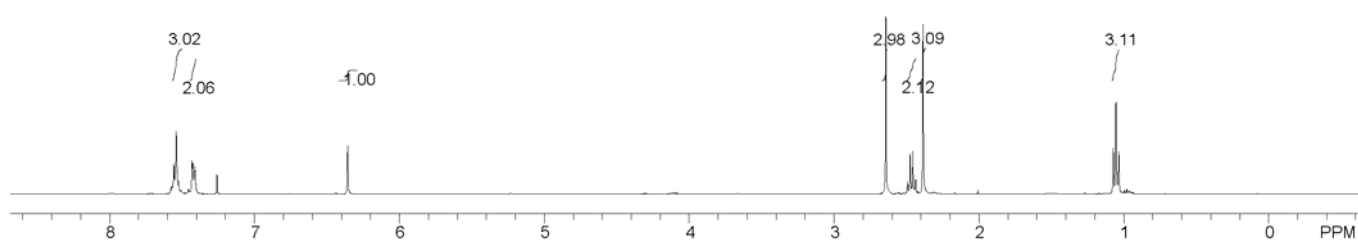

158.587  
154.252  
148.143  
143.924

131.086  
129.639  
129.072  
128.890

120.060

94.712

77.379  
77.059  
76.746

23.221  
21.716

14.820  
14.791

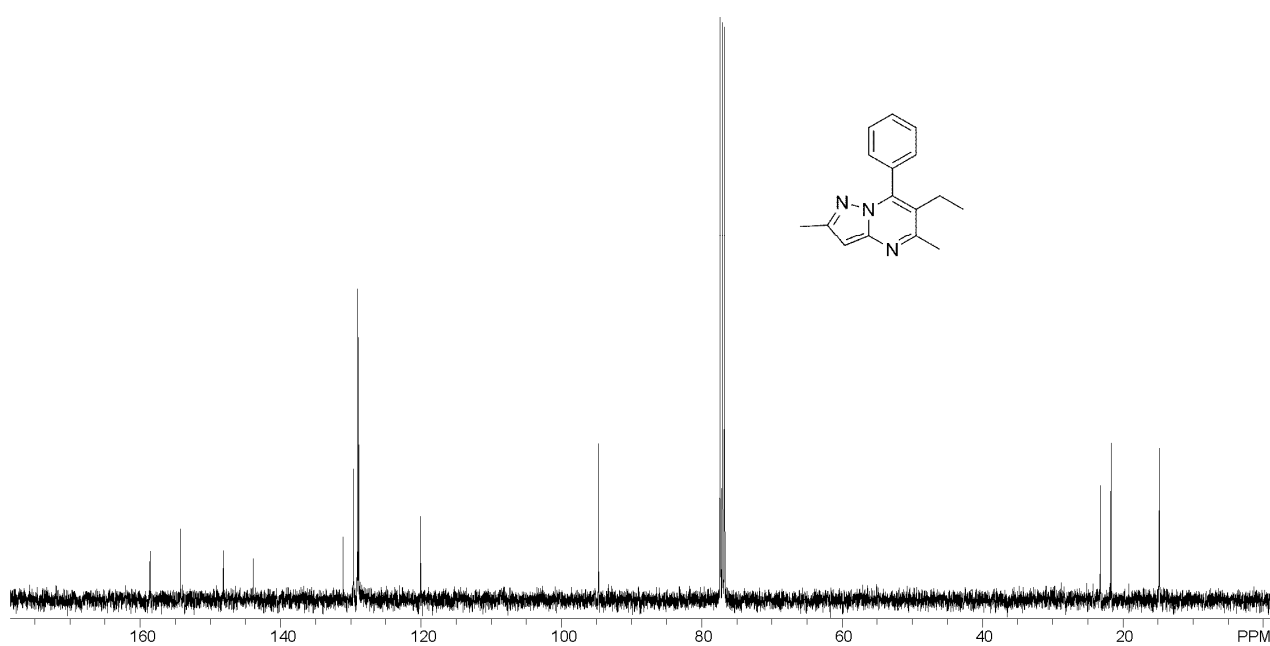

8.102  
8.096  
7.530  
7.514  
7.511  
7.500  
7.479  
7.474  
7.462  
7.459  
7.260  
6.675  
6.670

2.863  
2.315

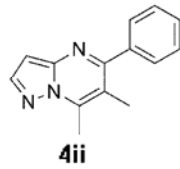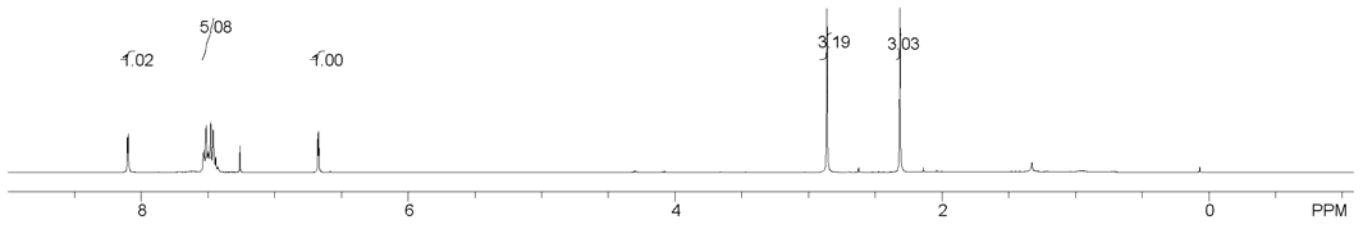

159.526  
146.899  
144.011  
139.647  
128.897  
128.744  
128.701  
128.672  
128.366

113.434

96.654

77.357  
77.037  
76.724

15.540  
14.122

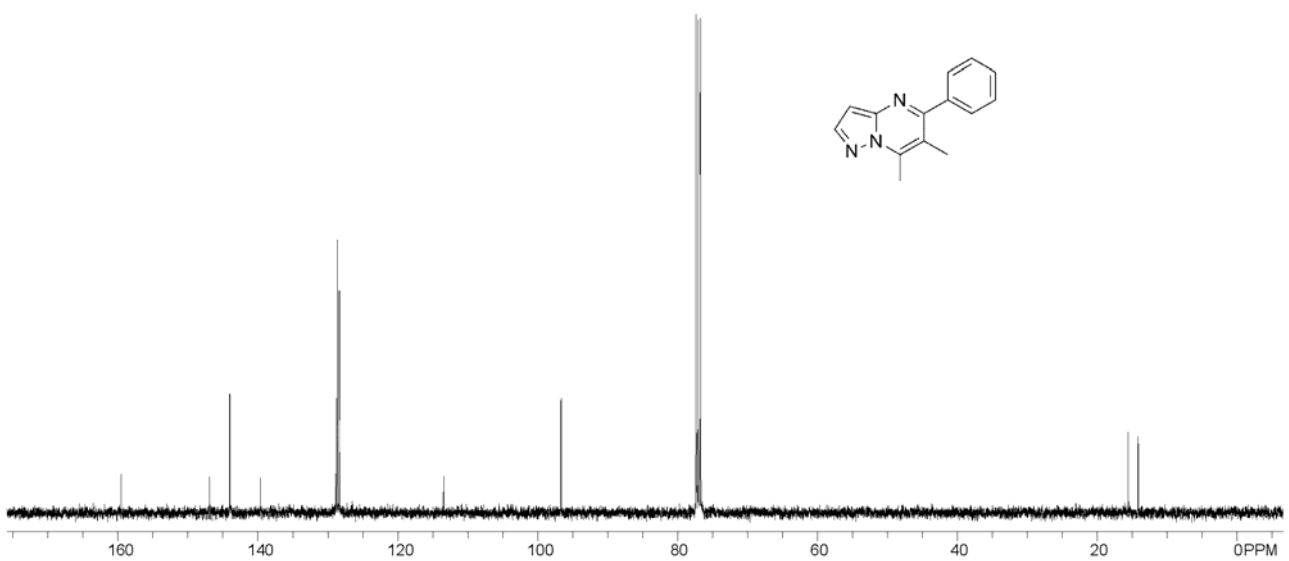

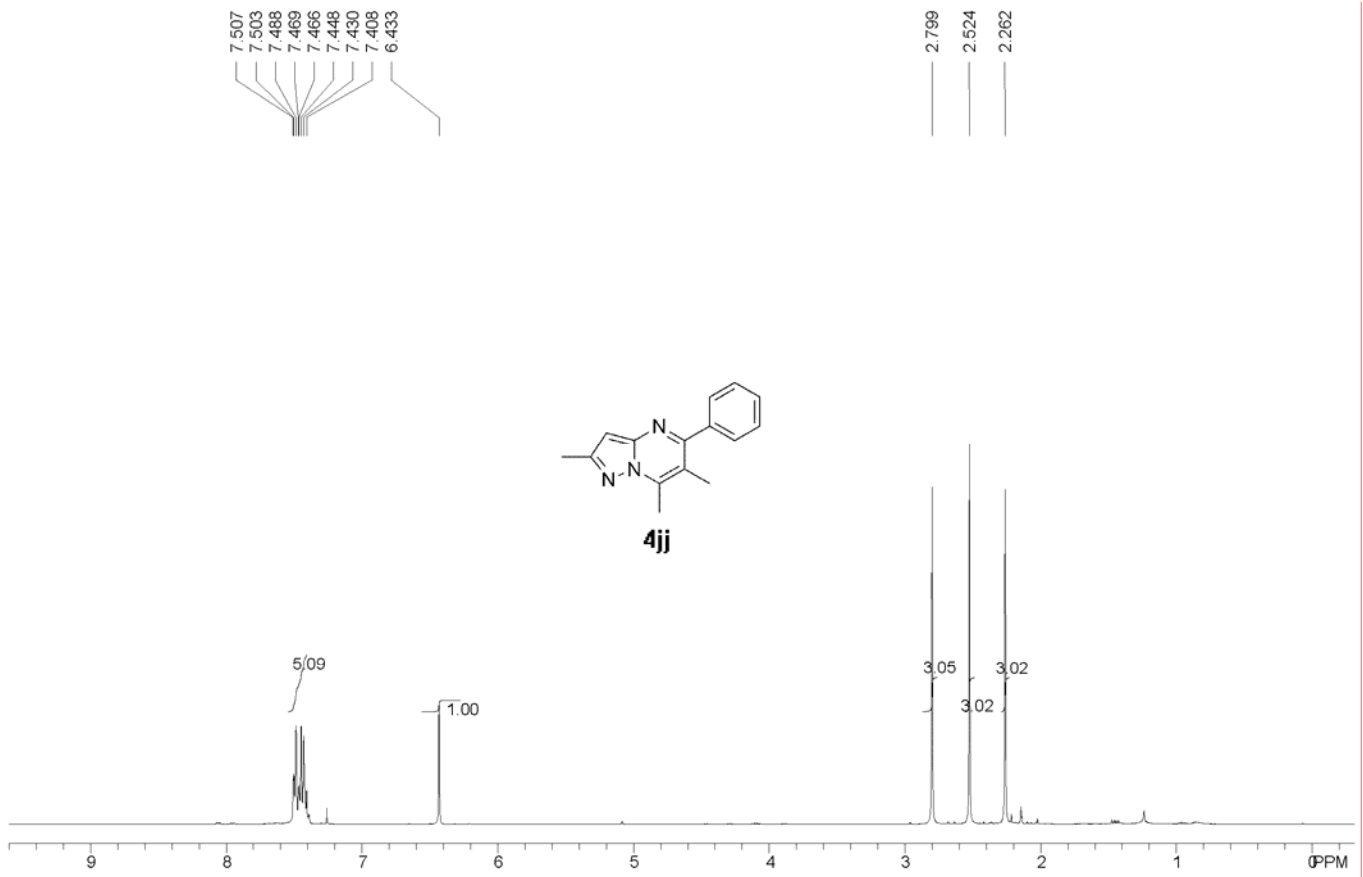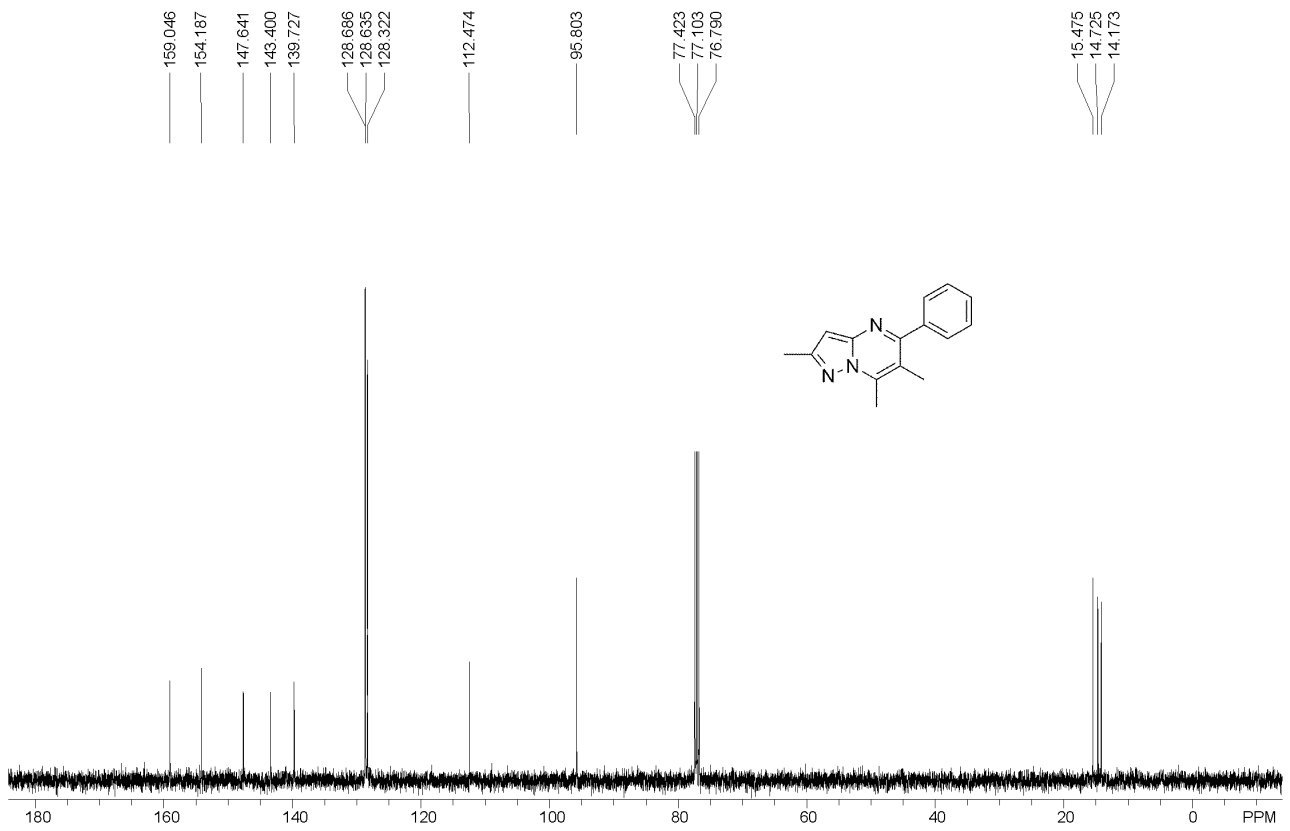

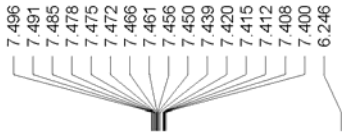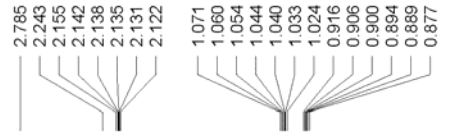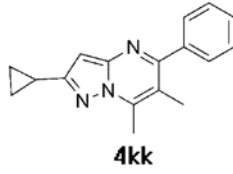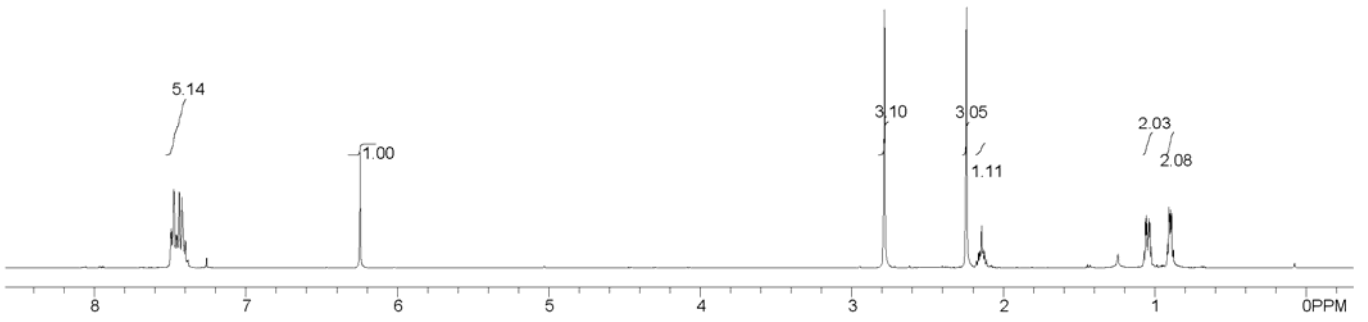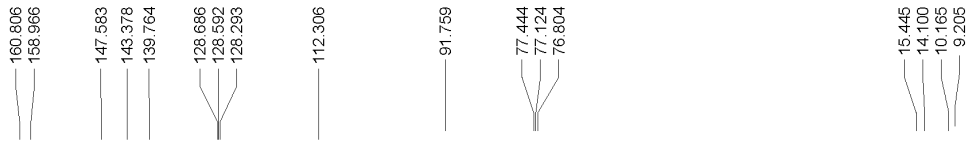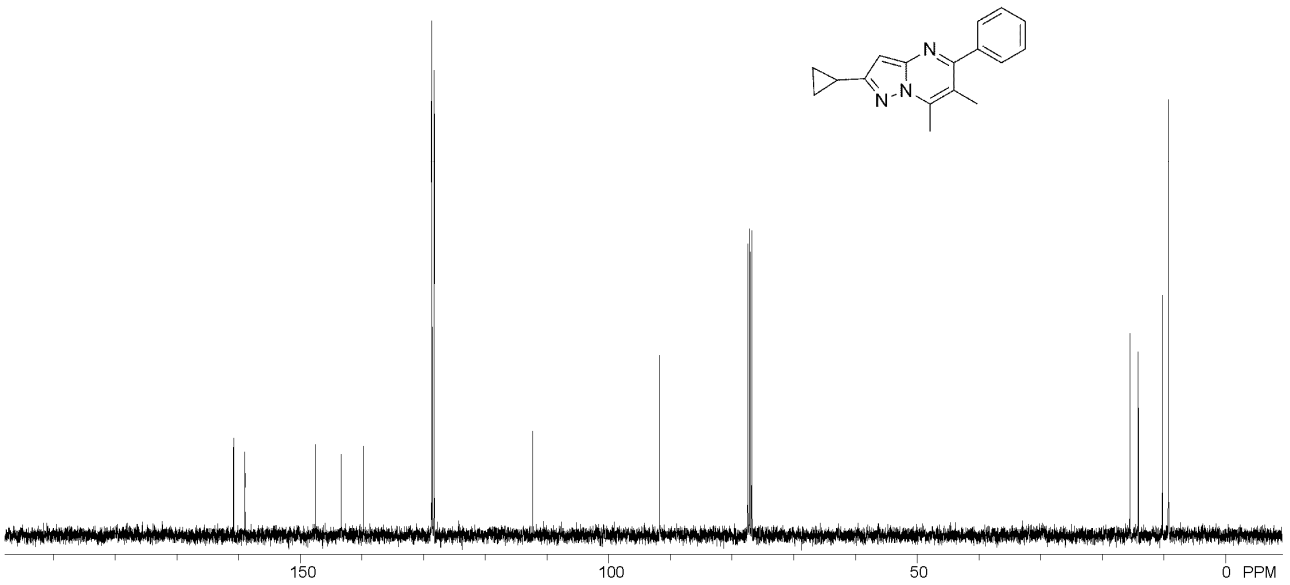

7.469  
7.463  
7.456  
7.441  
7.435  
7.259

6.443

2.839  
2.710  
2.691  
2.872  
2.664  
2.542

1.076  
1.058  
1.040

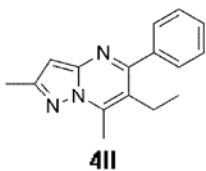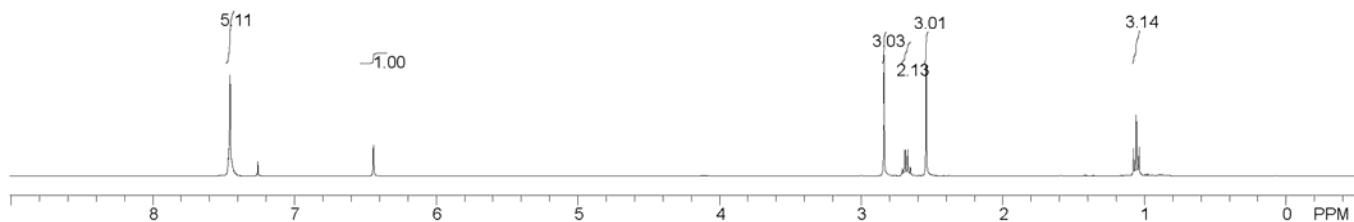

159.336  
154.405  
147.430  
143.298  
139.873

128.504  
128.330  
128.235  
119.136

96.803

77.372  
77.263  
77.059  
76.739

21.635  
15.067  
14.718  
13.845

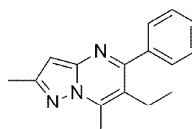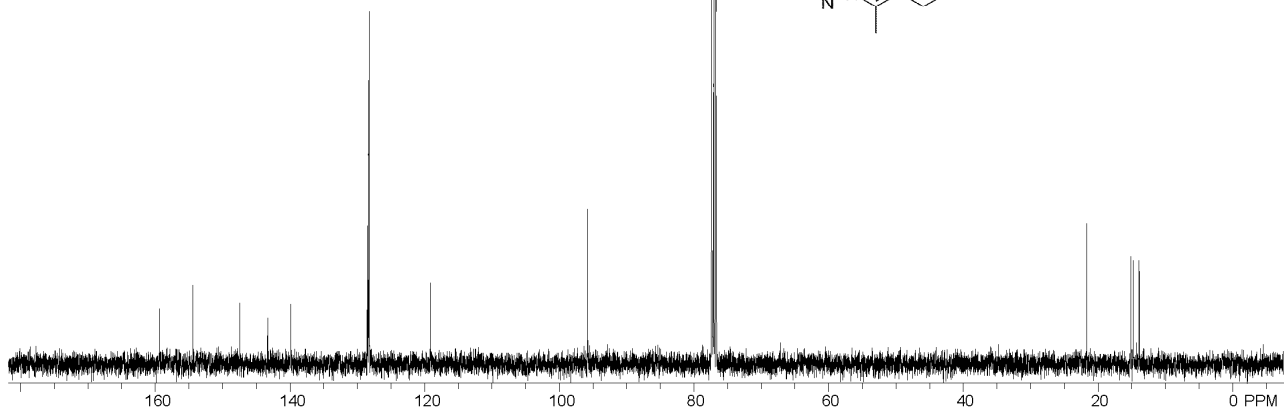

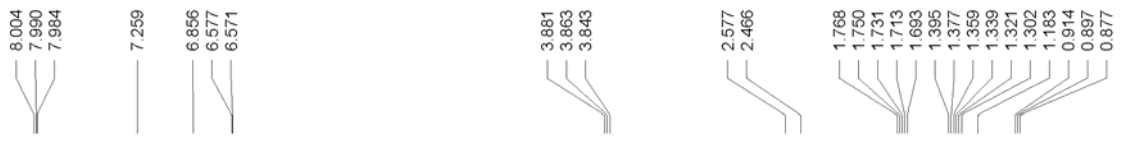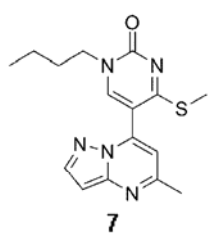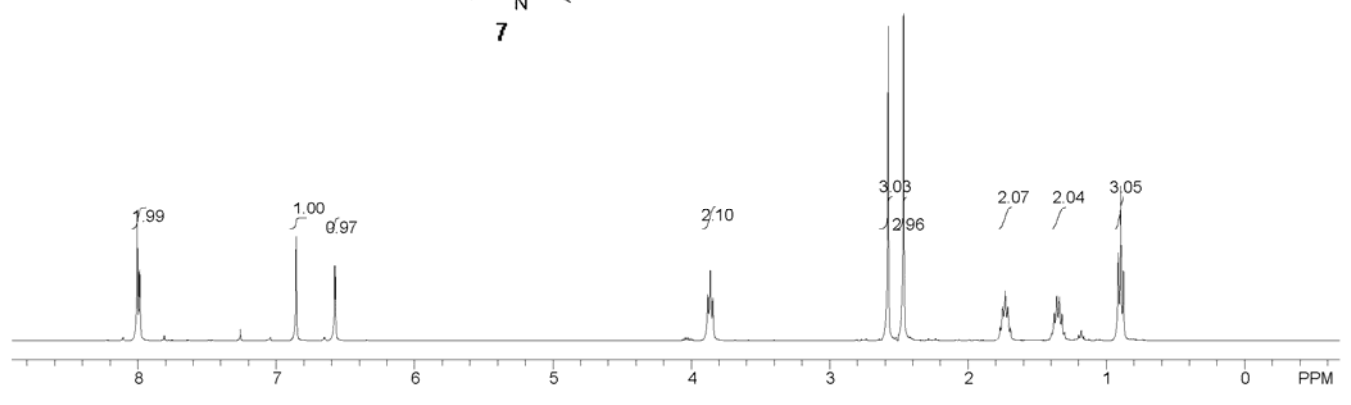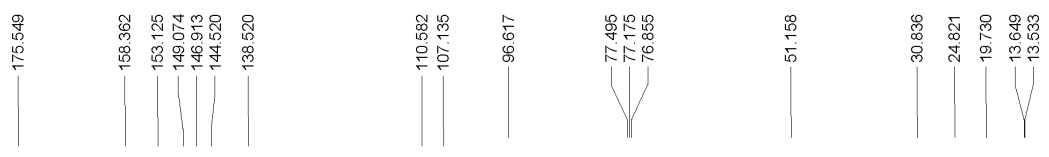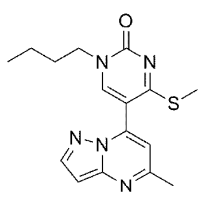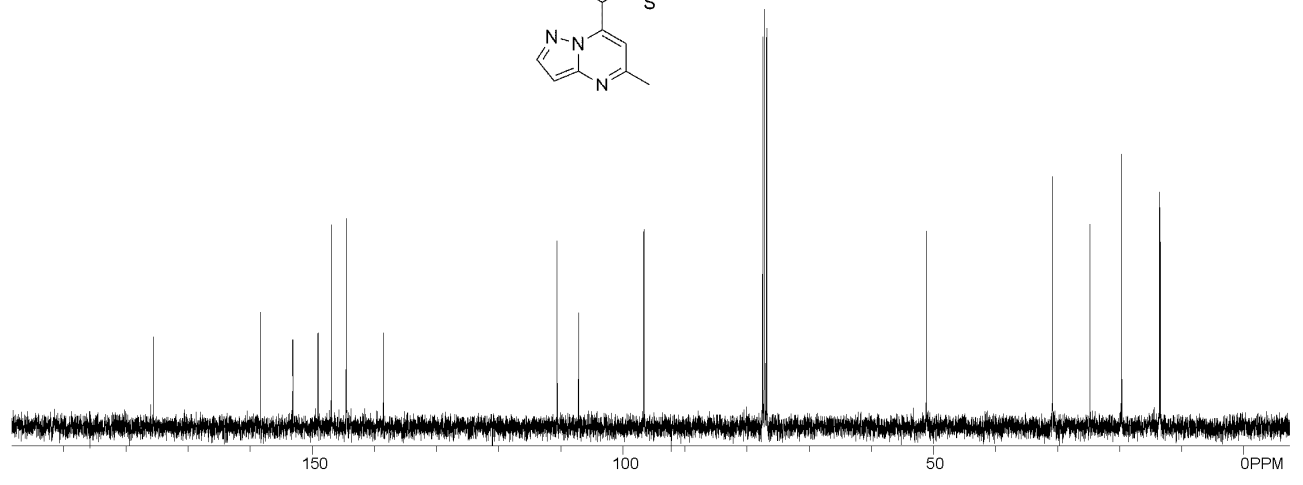



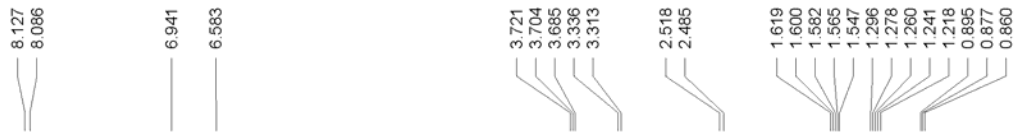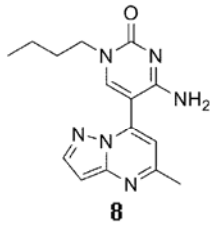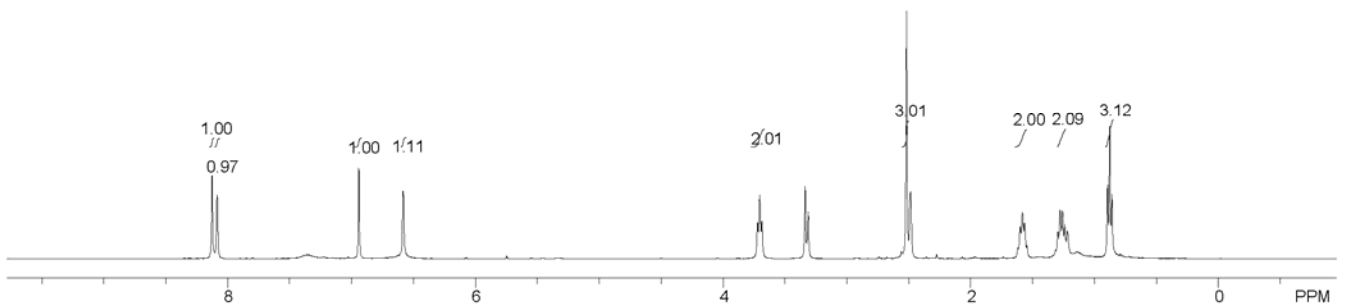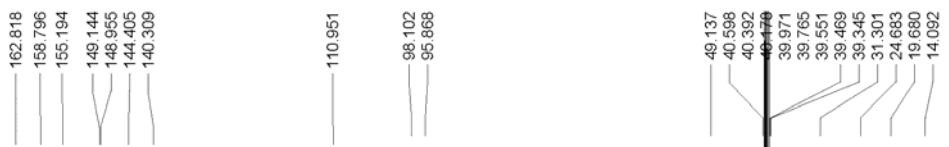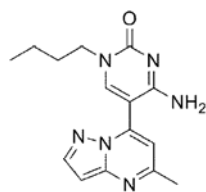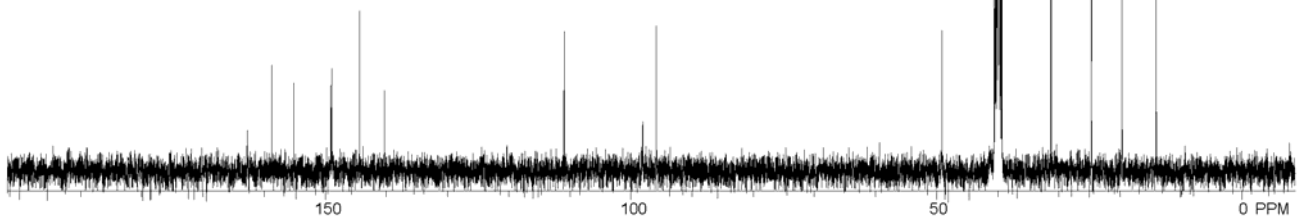

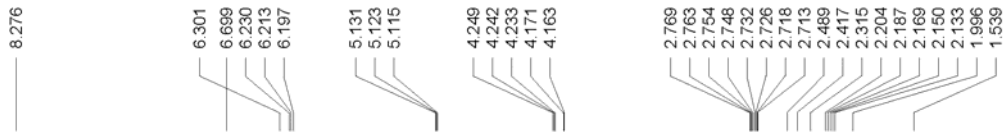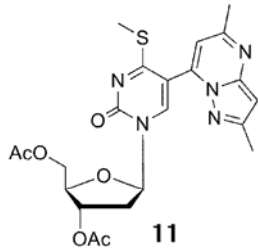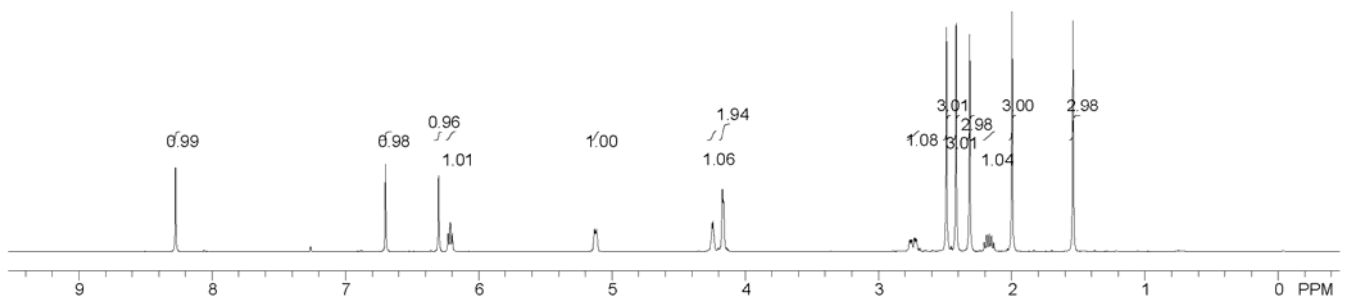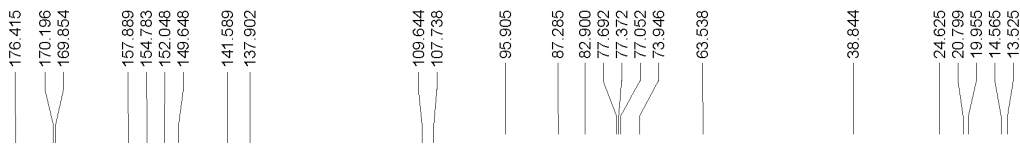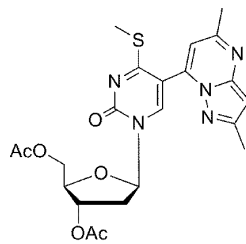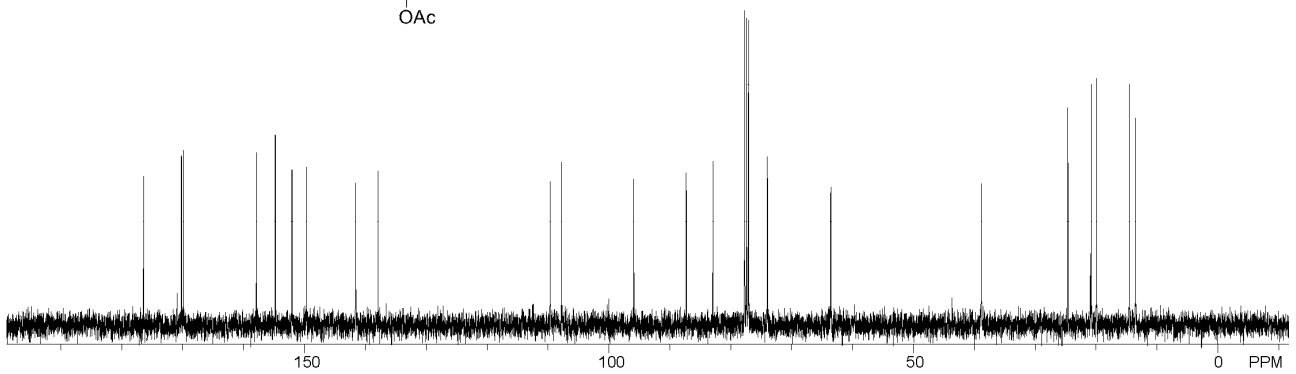

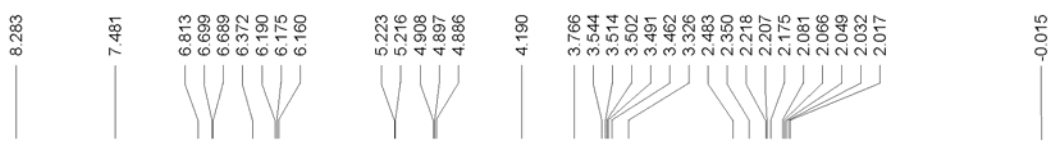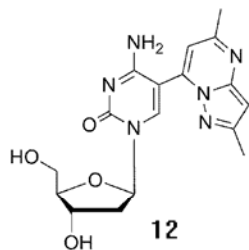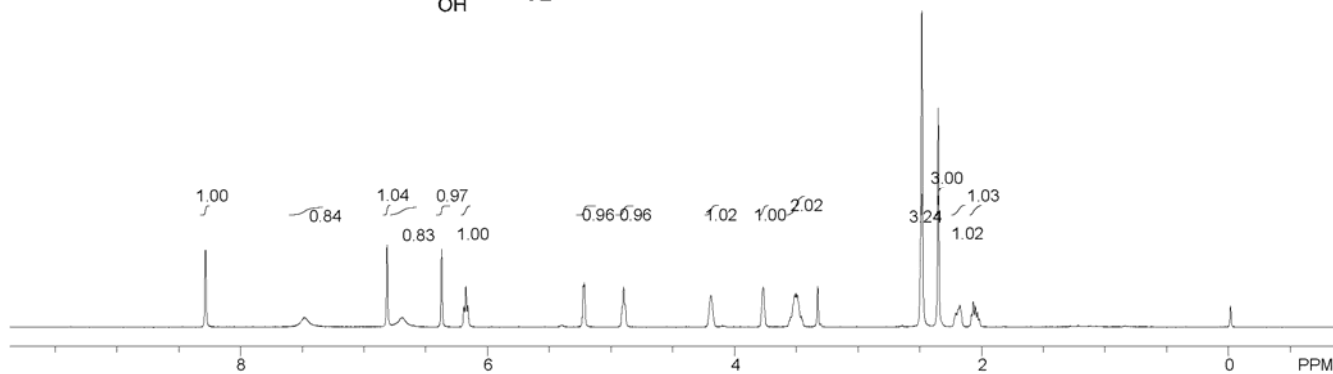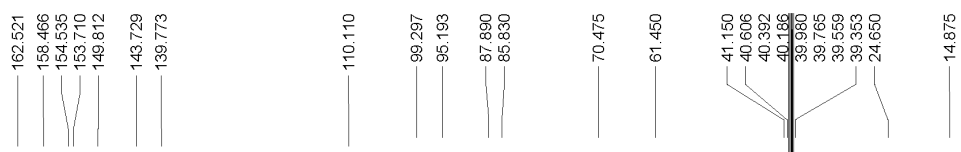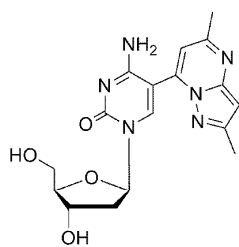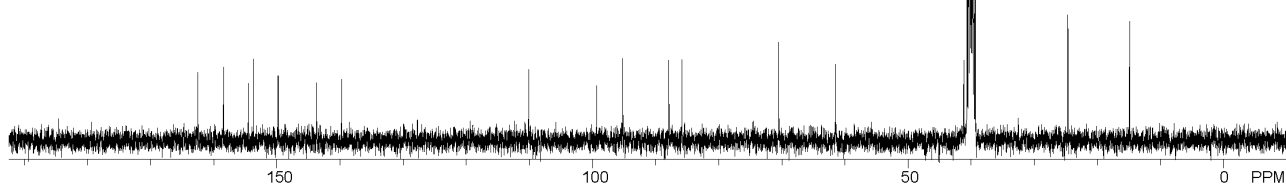

## IV. X-ray crystal structures and crystal data of 3jj and 4jj

### 4.1 X-ray crystal structure and data of 3jj

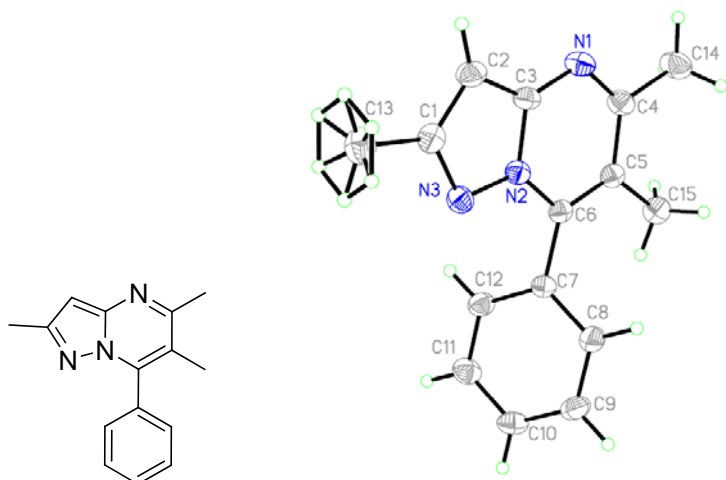

**Table 1** Crystal data and structure refinement of **3jj**

|                                 |                                                                                                                              |
|---------------------------------|------------------------------------------------------------------------------------------------------------------------------|
| Sum Formula                     | C <sub>15</sub> H <sub>15</sub> N <sub>3</sub>                                                                               |
| Formula weight                  | 237.30                                                                                                                       |
| Temperature                     | 296(2) K                                                                                                                     |
| Radiation type, wavelength      | Mo K $\alpha$ , 0.71073 Å                                                                                                    |
| Crystal system, space group     | Monoclinic, <i>P</i> 2 <sub>1</sub> / <i>n</i>                                                                               |
| Unit cell dimensions            | $a = 5.784(3)$ Å $\alpha = 90^\circ$<br>$b = 16.411(9)$ Å $\beta = 92.703(7)^\circ$<br>$c = 13.211(7)$ Å $\gamma = 90^\circ$ |
| Volume                          | 1252.6(12) Å <sup>3</sup>                                                                                                    |
| Z                               | 4                                                                                                                            |
| Calculated density              | 1.258 g/cm <sup>3</sup>                                                                                                      |
| Absorption coefficient          | 0.077 mm <sup>-1</sup>                                                                                                       |
| F(000)                          | 504                                                                                                                          |
| Crystal size                    | 0.39 × 0.11 × 0.09 mm                                                                                                        |
| Theta range for data collection | 2.48° to 25.50°                                                                                                              |
| Limiting indices                | $-6 \leq h \leq 6$ , $-19 \leq k \leq 19$ , $-15 \leq l \leq 15$                                                             |
| Reflection collected/unique     | 7574/2284 [R(int) = 0.050]                                                                                                   |
| Data completeness               | 0.985                                                                                                                        |
| Theta (max)                     | 25.50                                                                                                                        |

|                                      |                                     |
|--------------------------------------|-------------------------------------|
| Absorption correction                | Multi-scan                          |
| Refinement method                    | Full-matrix least-squares on $F^2$  |
| Data/restraints/parameters           | 2284/0/165                          |
| Goodness-of-fit on $F^2$             | 1.033                               |
| Final R indices [ $I > 2\sigma(I)$ ] | $R_1 = 0.0484$ , $wR_2 = 0.1084$    |
| R indices (all data)                 | $R_1 = 0.0804$ , $wR_2 = 0.1257$    |
| Largest diff. peak and hole          | 0.16 and -0.16 e. $\text{\AA}^{-3}$ |

## 4.2 X-ray crystal structure and data of 4jj

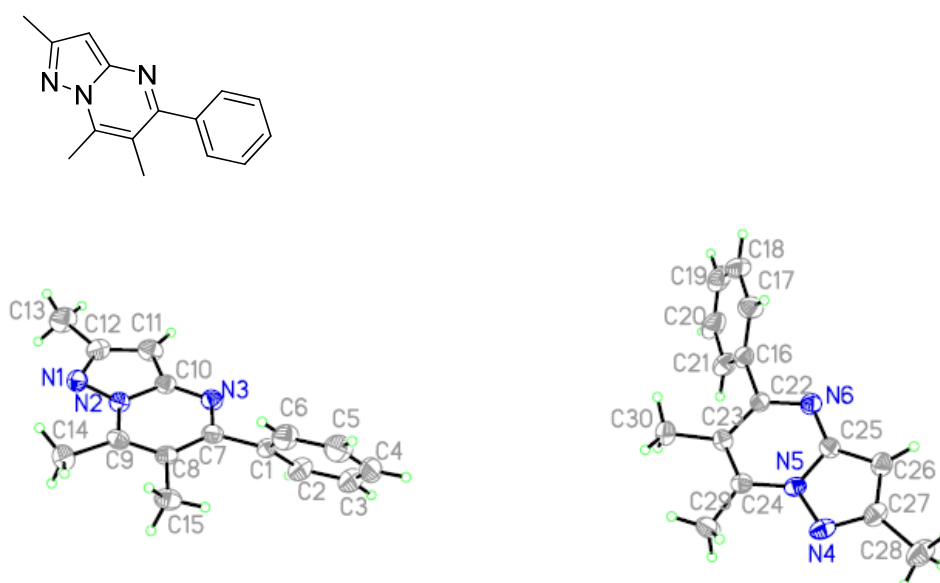

**Table 2** Crystal data and structure refinement of **4jj**

|                             |                                                                                                                                                           |
|-----------------------------|-----------------------------------------------------------------------------------------------------------------------------------------------------------|
| Sum Formula                 | $C_{30}H_{30}N_6$                                                                                                                                         |
| Formula weight              | 474.60                                                                                                                                                    |
| Temperature                 | 296(2) K                                                                                                                                                  |
| Radiation type, wavelength  | Mo $K\alpha$ , 0.71073 $\text{\AA}$                                                                                                                       |
| Crystal system, space group | Monoclinic, $P2_1/c$                                                                                                                                      |
| Unit cell dimensions        | $a = 25.257(13) \text{\AA}$ $\alpha = 90^\circ$<br>$b = 7.226(4) \text{\AA}$ $\beta = 106.999(6)^\circ$<br>$c = 14.807(8) \text{\AA}$ $\gamma = 90^\circ$ |
| Volume                      | $2584(2) \text{\AA}^3$                                                                                                                                    |
| Z                           | 4                                                                                                                                                         |
| Calculated density          | $1.220 \text{ g/cm}^3$                                                                                                                                    |

---

|                                   |                                                   |
|-----------------------------------|---------------------------------------------------|
| Absorption coefficient            | 0.075 mm <sup>-1</sup>                            |
| F(000)                            | 1008                                              |
| Crystal size                      | 0.33 × 0.25 × 0.11 mm                             |
| Theta range for data collection   | 2.88° to 21.86°                                   |
| Limiting indices                  | -30 ≤ h ≤ 30, -8 ≤ k ≤ 8, -17 ≤ l ≤ 17            |
| Reflection collected/unique       | 4741/4741 [R(int) = 0.0000]                       |
| Data completeness                 | 0.986                                             |
| Theta (max)                       | 25.50                                             |
| Absorption correction             | Multi-scan                                        |
| Refinement method                 | Full-matrix least-squares on F <sup>2</sup>       |
| Data/restraints/parameters        | 4741/0/333                                        |
| Goodness-of-fit on F <sup>2</sup> | 1.045                                             |
| Final R indices [I > 2σ(I)]       | R <sub>1</sub> = 0.0519, wR <sub>2</sub> = 0.1307 |
| R indices (all data)              | R <sub>1</sub> = 0.0849, wR <sub>2</sub> = 0.1477 |
| Largest diff. peak and hole       | 0.14 and -0.16 e.Å <sup>-3</sup>                  |

---
